# Supplementary material for: Rising global burden of migraine among adolescents and young adults: a 30-year analysis (1990–2021)
Source: Frontiers journal article supplement (doi:10.3389/fneur.2025.1652468), 2025-09-01
Supplement: Image_2.pdf [file Image_2.pdf]

A

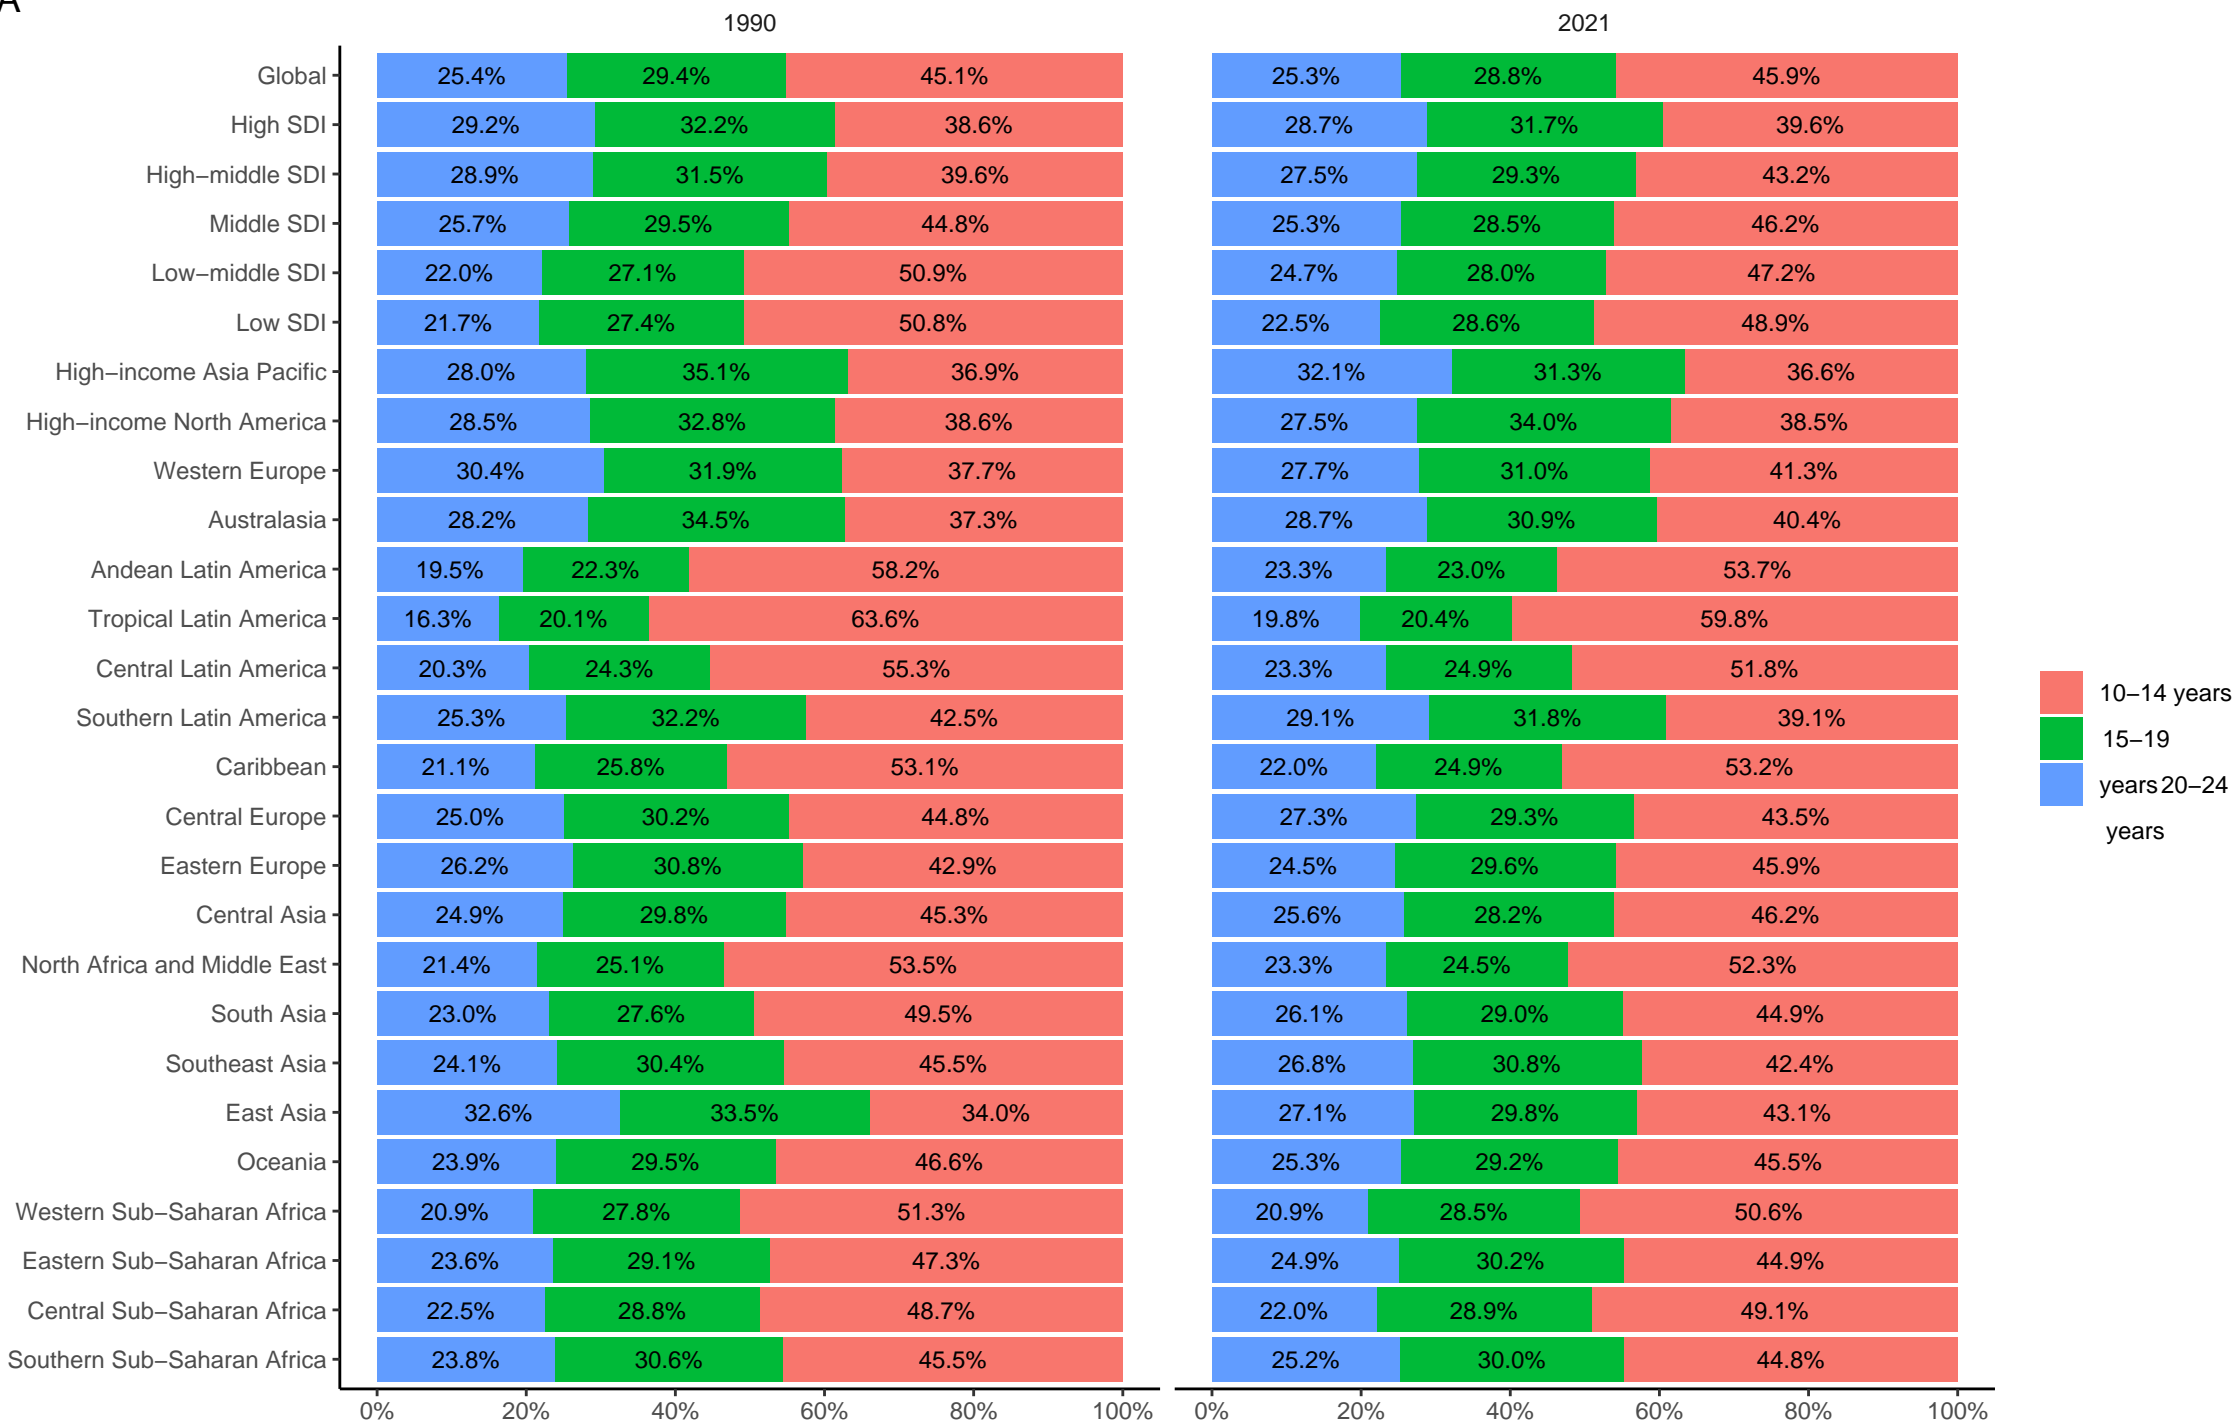

Incidence numbers in each age groups accounting for the total incidence numbers of the population aged 10-24 in 1990 and 2021

B

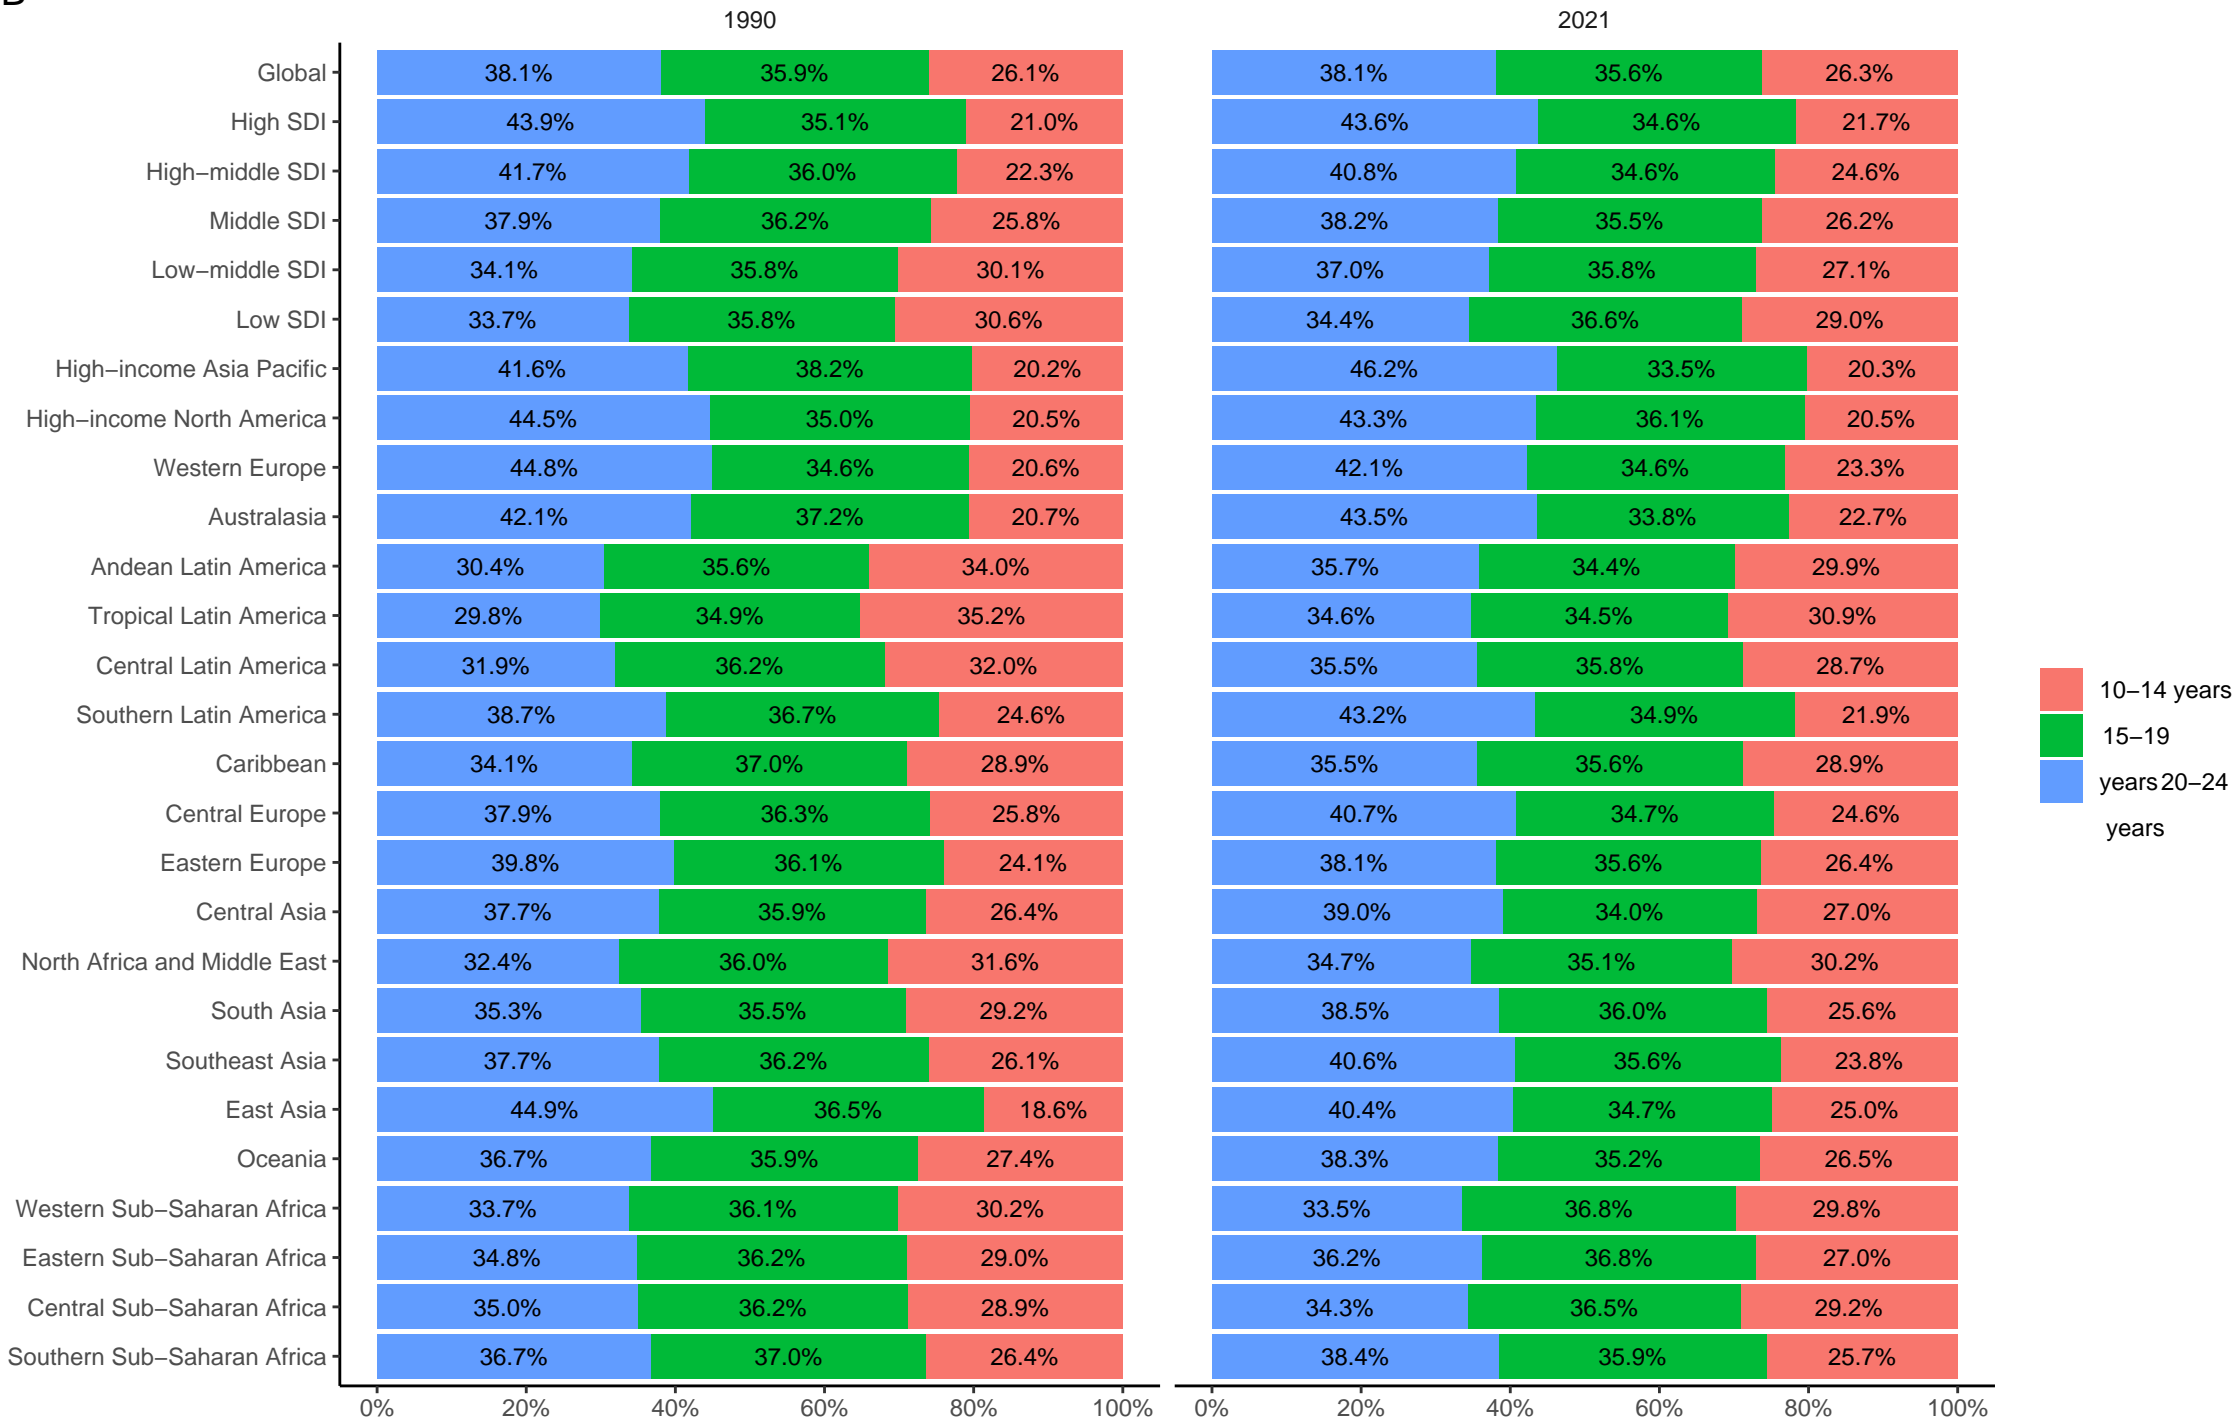

Prevalence numbers in each age groups accounting for the total prevalence numbers of the population aged 10-24 in 1990 and 2021

C

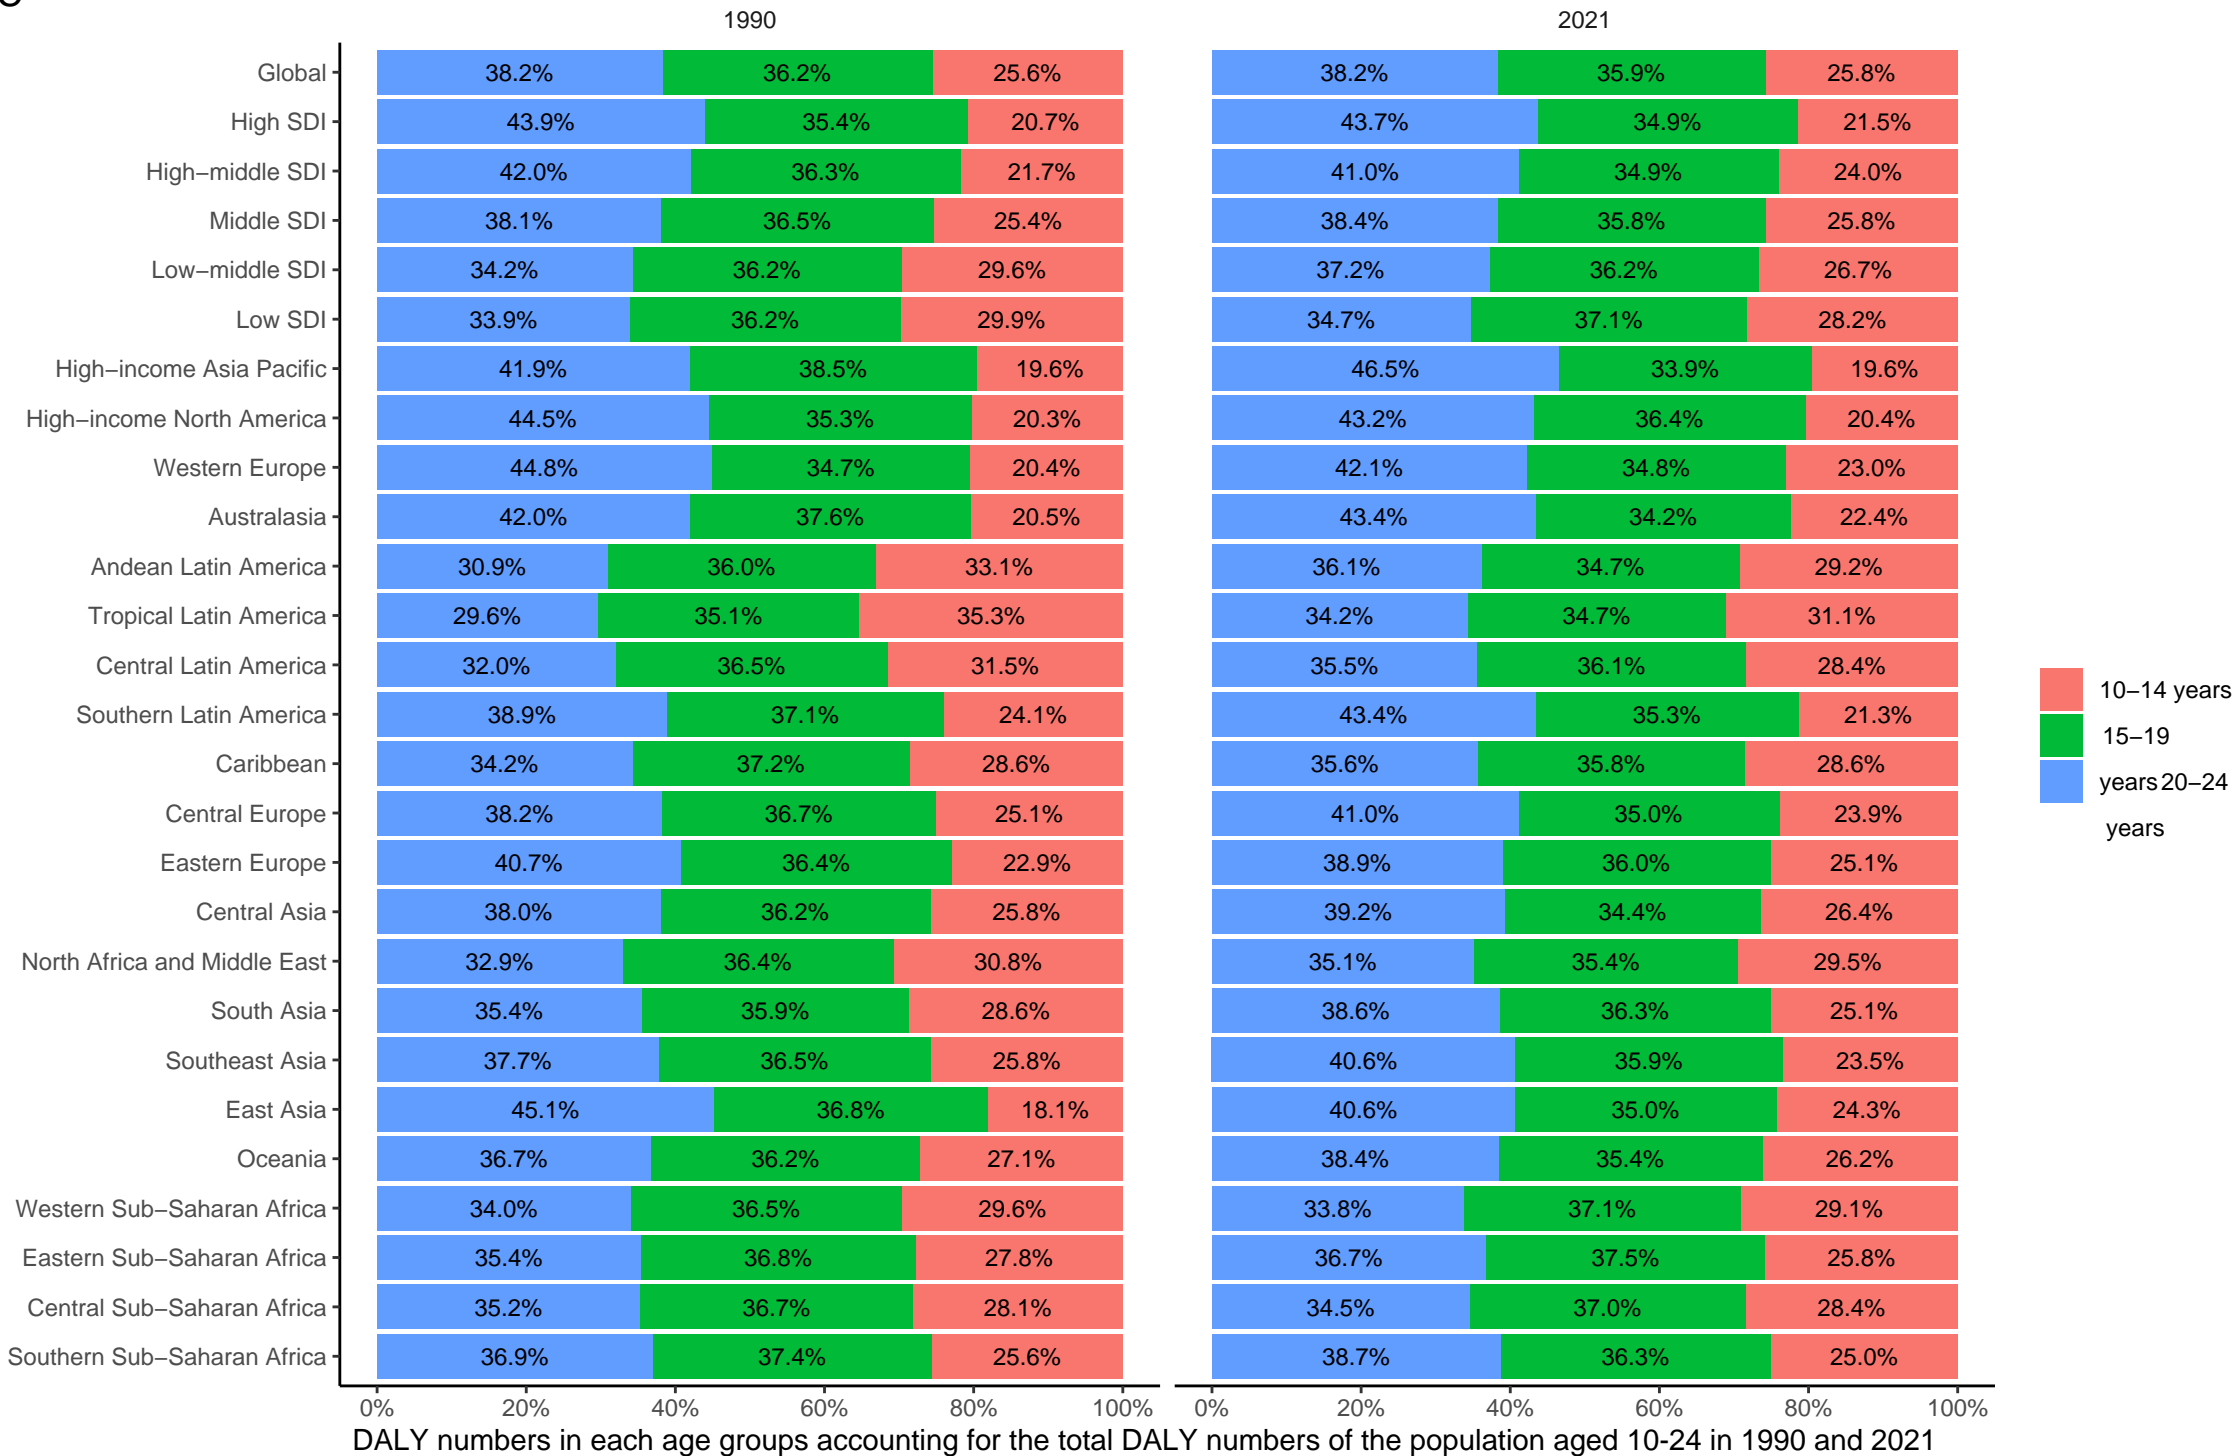

D

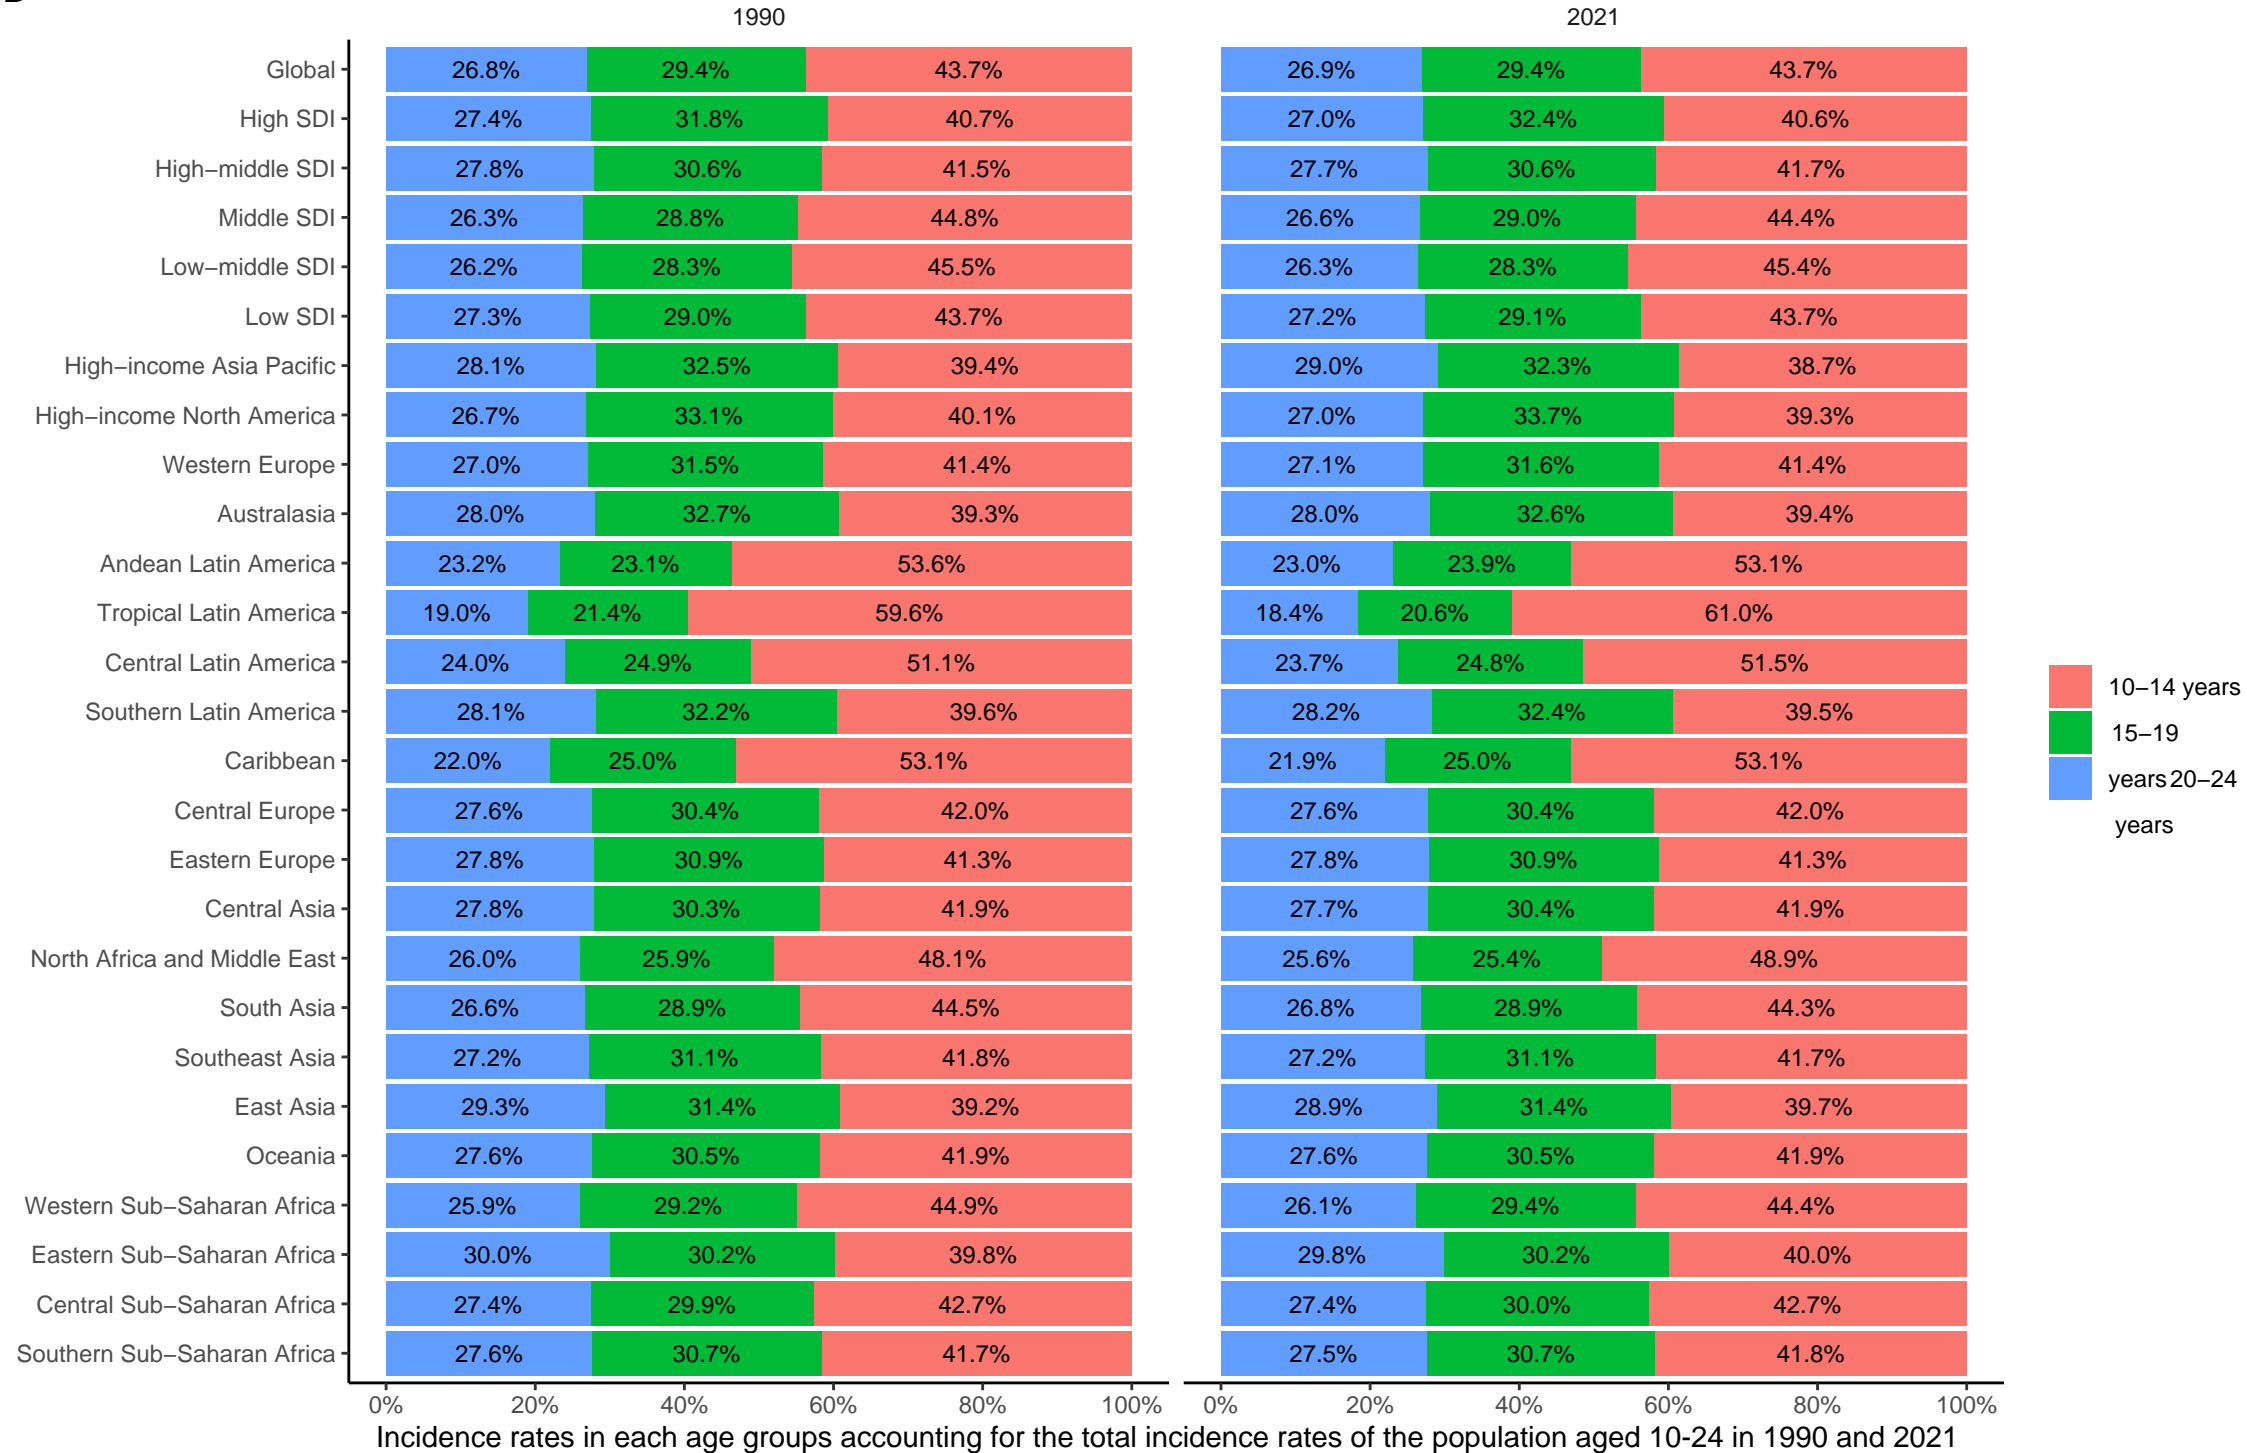

E

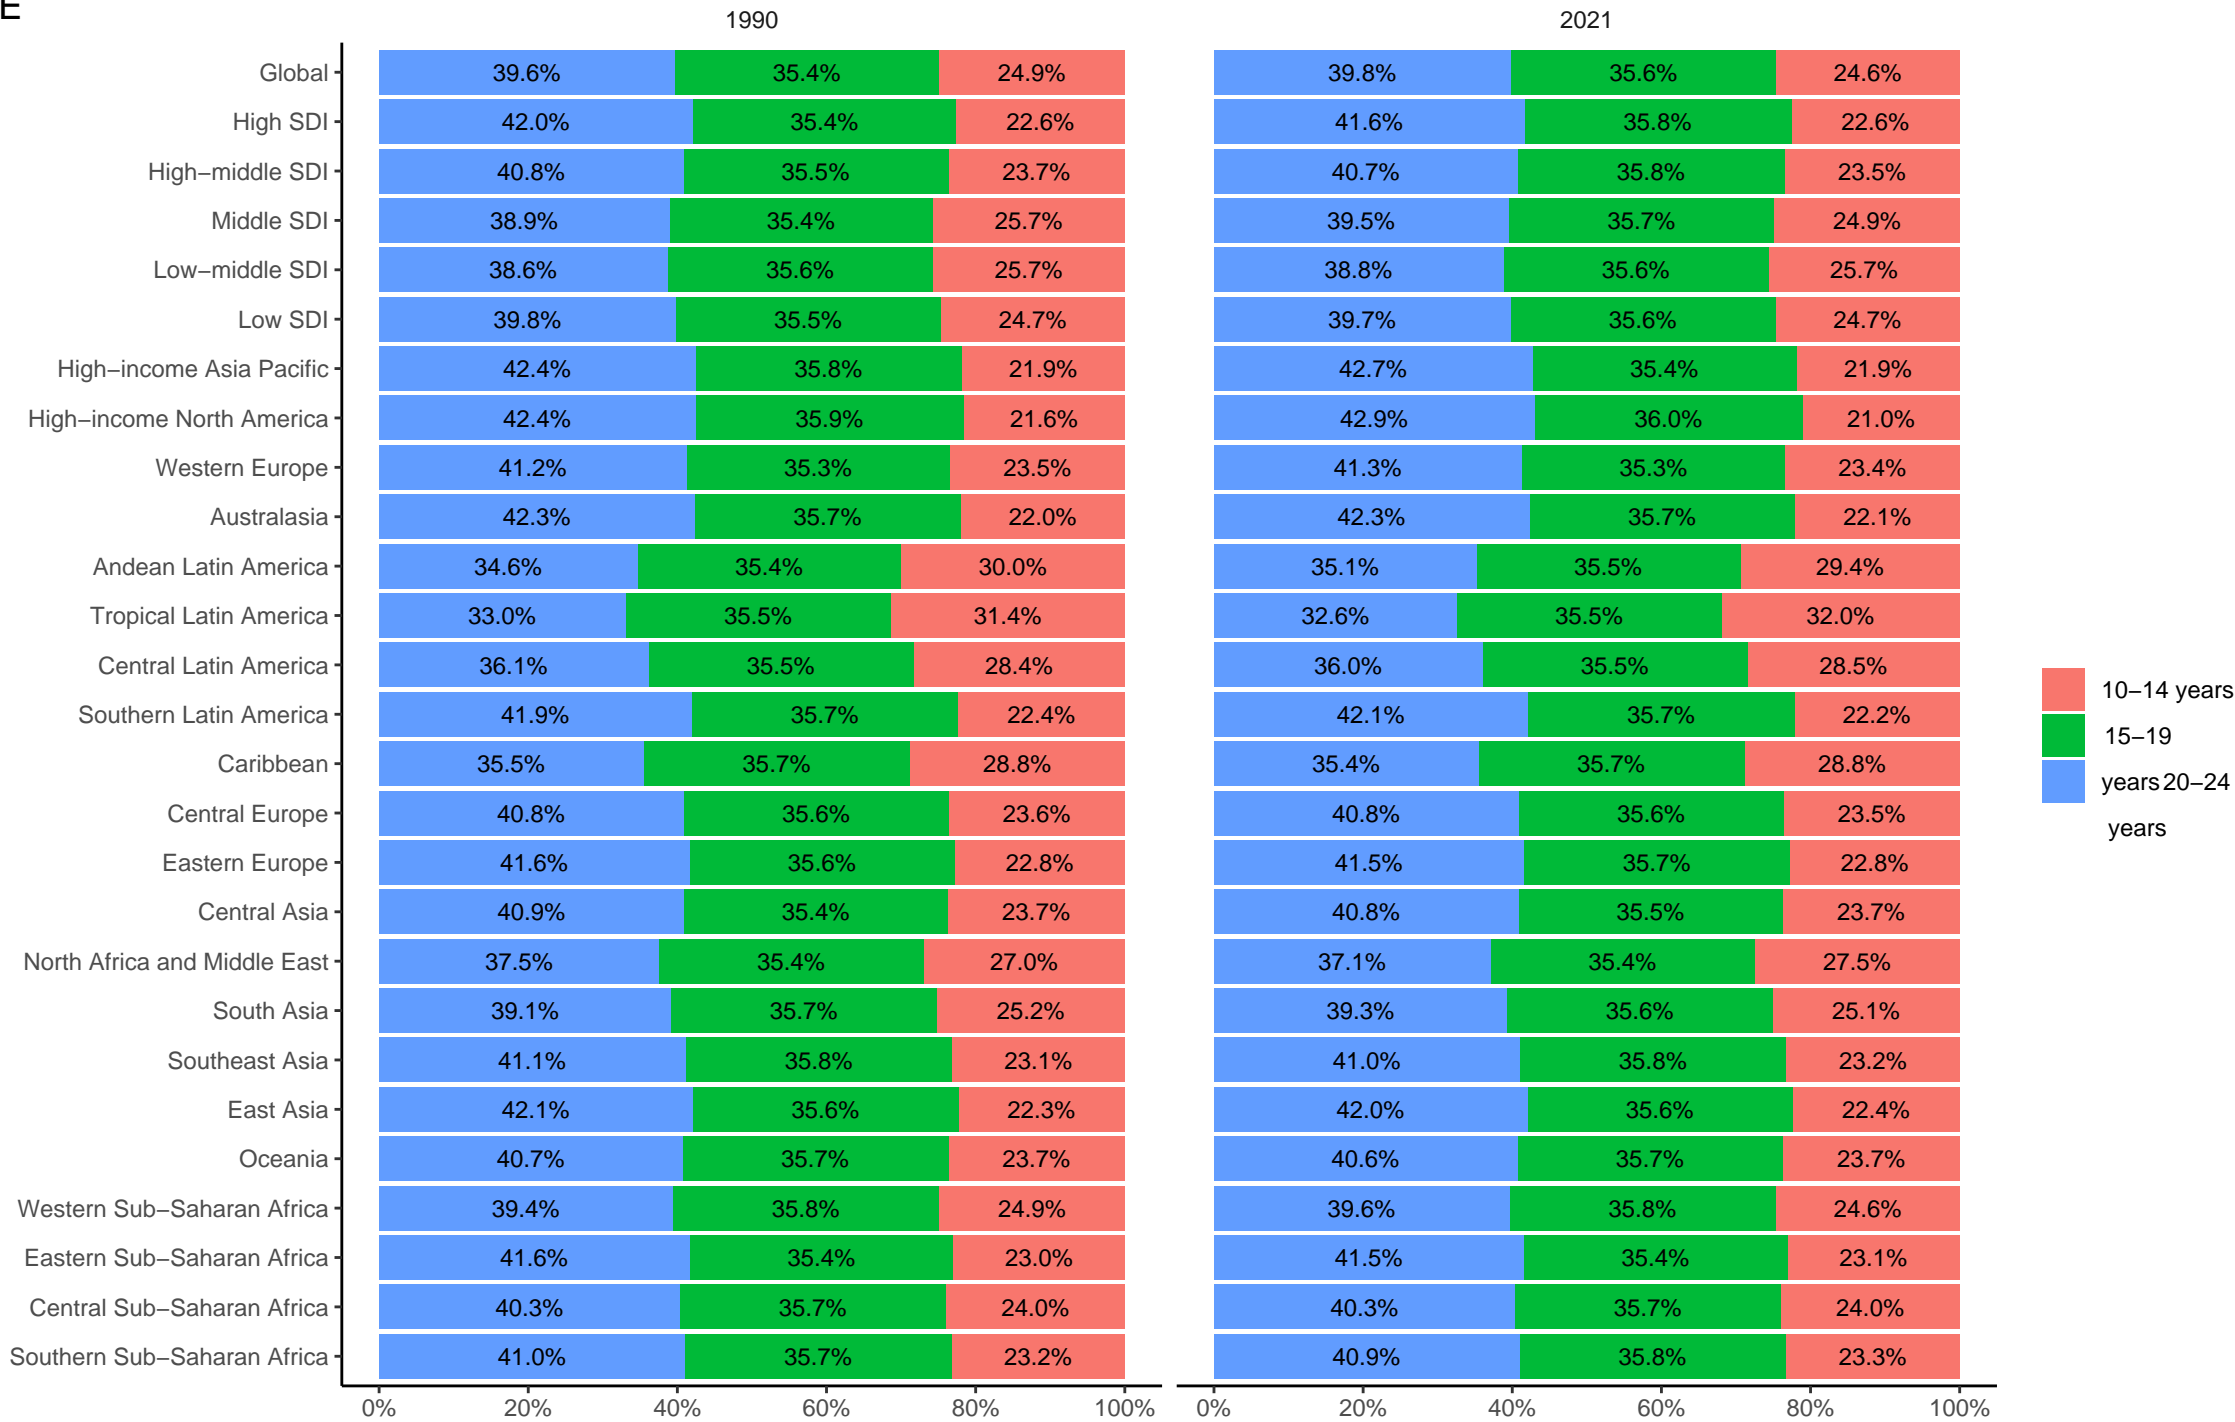

Prevalence rates in each age groups accounting for the total prevalence rates of the population aged 10-24 in 1990 and 2021

F

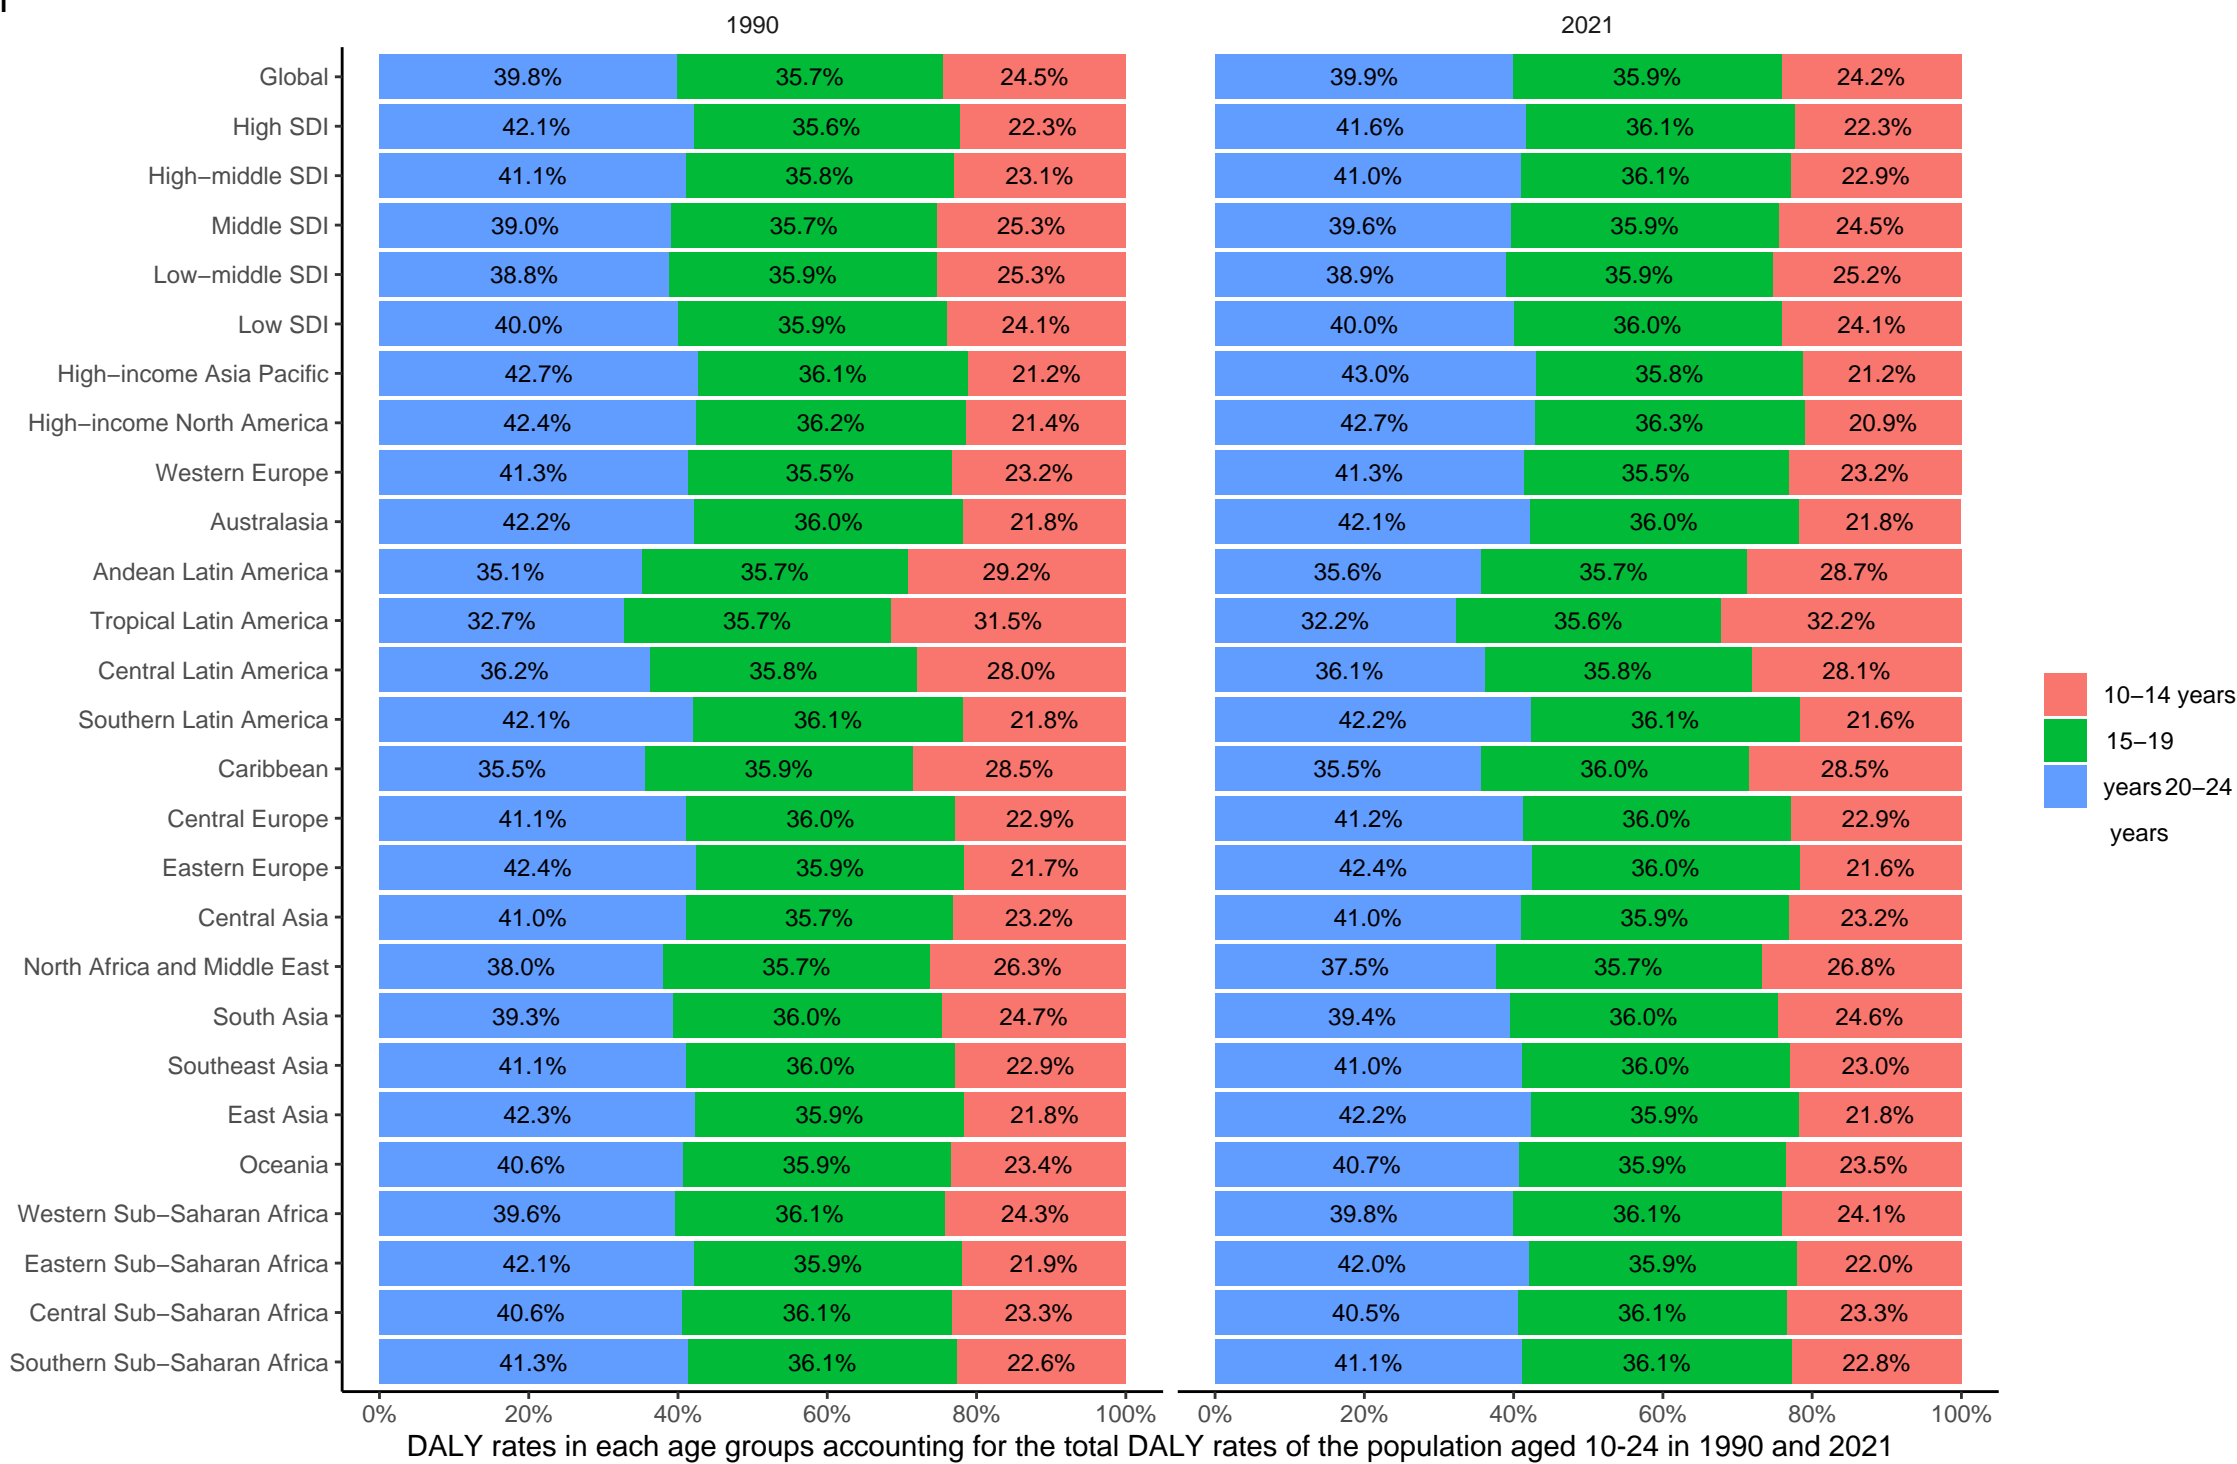

Supplementary figure 2: The percentage change of migraine incidence, prevalence, DALY numbers and rates in each age groups accounting for the total incidence, prevalence, DALY numbers and rates of the population aged 10-24 in 1990 and 2021, globally and by SDI quintile and GBD super-region: (A) incidence number; (B) prevalence number; (C) DALY number; (D) incidence rate; (E) prevalence rate; (F) DALY rate.
