# Supplementary material for: Rising global burden of migraine among adolescents and young adults: a 30-year analysis (1990–2021)
Source: Front Neurol. 2025 Sep 1;16:1652468. doi: 10.3389/fneur.2025.1652468 (PMC12434965; doi:10.3389/fneur.2025.1652468)
Supplement: Supplementary file 5 [file Table_1.xls]

## Sheet: Sheet1
Additional table 1: 1990 - 2021 data for 10 - 24-year-olds by regions
			1990												2021												EAPC_95%CI			1990-2021		1990-2021			1990-2021
			Incidence (95% UI)				Prevalence (95% UI)				DALYs (95% UI)				Incidence (95% UI)				Prevalence (95% UI)				DALYs (95% UI)							AAPC (95% UI)	P-Value	Net drift(% per year)			Percentage change
Location	Sex	Age	Counts	Counts (million)	Rate	ASIR (per 100 000)	Counts	Counts (million)	Rate	ASPR (per 100 000)	Counts	Counts (million)	Rate	ASDR (per 100 000)	Counts	Counts (million)	Rate	ASIR (per 100 000)	Counts	Counts (million)	Rate	ASPR (per 100 000)	Counts	Counts (million)	Rate	ASDR (per 100 000)	ASIR (per 100 000)	ASPR (per 100 000)	ASDR (per 100 000)	ASIR		Incidence	Prevalence	DALYs	Incidence	Prevalence	DALYs
Global	Both	10-24	27871854.95(22050317.58,34080340.81)	27.87(22.05, 34.08)	1801.445403 (1425.181184,2202.719316)	1811.89(1207.27,2535.54)	243622381.60(190056247.70,304400990.00)	243.62(190.06, 304.40)	15746.07862 (12283.93138,19674.39071)	15670.63(11887.87,20039.81)	8984237.22(723838.06,21849939.42)	8.98 (0.72, 21.85)	580.6794295 (46.78392437,1412.230115)	577.74(46.62,1405.99)	34420188.68(27308204.29,42202659.23)	34.42(27.31, 42.20)	1823.321503 (1446.582312,2235.577986)	1828.24(1216.56,2560.48)	304083779.80(235569666.70,379316809.00)	304.08(235.57, 379.32)	16108.06087 (12478.70089,20093.33827)	16068.23(12173.24,20581.24)	11220043.75(871491.61,27275920.03)	11.22(0.87, 27.28)	594.3531345 (46.16504036,1444.872136)	592.83(47.56,1445.15)	0.05(-0.39,0.50)	0.11(-0.35,0.57)	0.11(-0.33,0.56)	0.0282 (0.0155,0.0409)	1.3e-05	0.04357808(0.01997436,0.06718738)	0.09264102(0.07775362,0.1075306)	0.1037303(0.08789963,0.1195634)	1.21% (-0.09%,2.44%)	2.30% (0.67%,3.76%)	2.35% (-0.40%,4.10%)
	Female	10-24	17162112.90(13630945.87,20992781.50)	17.16(13.63, 20.99)	2254.896593 (1790.943434,2758.200681)	2270.98(1503.99,3180.91)	151331481.60(119022616.10,188258158.20)	151.33(119.02, 188.26)	19883.14867 (15638.14975,24734.8728)	19764.45(15013.87,25153.75)	5558492.26(417604.96,13400425.40)	5.56 (0.42, 13.40)	730.3194737 (54.86830305,1760.655798)	725.79(55.16,1766.55)	20709747.35(16430802.69,25466194.37)	20.71(16.43, 25.47)	2250.257073 (1785.320184,2767.07789)	2258.91(1496.50,3178.99)	184562017.30(144506483.00,230343947.00)	184.56(144.51, 230.34)	20053.93779 (15701.62735,25028.46062)	19982.87(15191.63,25518.51)	6780470.53(506040.72,16441141.53)	6.78(0.51, 16.44)	736.7449498 (54.98481905,1786.443571)	734.07(56.48,1784.99)	-0.00(-0.02,0.01)	0.05(0.04,0.06)	0.06(0.05,0.07)	-0.0194 (-0.0318,-0.007)	0.002081	-0.003993343(-0.02626515,0.01828343)	0.05056132(0.0343007,0.06682459)	0.06184416(0.0452408,0.07845027)	-0.21% (-2.03%,1.63%)	0.86% (-1.15%,2.69%)	0.88% (-1.66%,3.34%)
	Male	10-24	10709742.05(8452504.23,13092458.21)	10.71(8.45, 13.09)	1362.406987 (1075.259402,1665.516916)	1368.65(913.06,1926.31)	92290899.97(71564697.06,115655263.50)	92.29(71.56, 115.66)	11740.50378 (9103.883444,14712.72963)	11698.38(8807.39,15027.08)	8984237.22(723838.06,21849939.42)	8.98 (0.72, 21.85)	435.7956376 (38.95650462,1053.286119)	434.10(38.40,1054.70)	13710441.33(10792754.64,16827862.41)	13.71(10.79, 16.83)	1417.179119 (1115.592573,1739.411201)	1419.46(946.54,1993.82)	119521762.50(92445144.66,150305684.10)	119.52(92.45, 150.31)	12354.36132 (9555.588002,15536.33992)	12336.87(9243.96,15823.68)	4439573.21(367526.15,10776871.79)	4.44(0.37, 10.78)	458.8962751 (37.98932359,1113.950843)	458.21(38.15,1116.50)	0.13(0.11,0.15)	0.18(0.17,0.19)	0.18(0.18,0.19)	0.1172 (0.1063,0.1281)	0	0.1370882(0.109933,0.1642508)	0.1789744(0.1641216,0.1938293)	0.1885043(0.170922,0.2060897)	4.02% (2.14%,5.81%)	5.23% (3.07%,7.32%)	5.30% (-1.70%,8.69%)
High SDI	Both	10-24	4021672.18(3128653.81,4996473.93)	4.02(3.13, 4.99)	2053.367411 (1597.414081,2551.077335)	2089.17(1369.83,2957.63)	34660912.45(27257269.45,43219538.66)	34.66(27.26, 43.22)	17697.01381 (13916.89485,22066.83894)	17254.79(12977.12,22119.94)	1259879.49(102559.08,3058864.27)	1.26 (0.10, 3.06)	643.2636408 (52.36415598,1561.781254)	626.84(50.37,1521.20)	3965361.29(3078187.15,4938604.96)	3.97(3.08, 4.94)	1875.34422 (1495.436701,2303.049074)	2169.76(1430.09,3081.44)	33512614.25(26174122.81,42022876.69)	33.51(26.17, 42.02)	18058.81551 (14104.35042,22644.7084)	17679.21(13343.22,22720.91)	1213572.03(95016.80,2904709.48)	1.21(0.10, 2.90)	653.952963 (51.20134154,1565.249798)	640.04(50.46,1545.09)	0.15(-0.52,0.83)	0.13(-0.49,0.76)	0.13(-0.48,0.74)	0.1212 (0.1007,0.1418)	0	0.1603409(0.1159102,0.2047913)	0.1700561(0.1419384,0.1981817)	0.1705332(0.1449255,0.1961474)	4.06% (2.11%,6.29%)	2.04% (0.09%,4.30%)	1.66% (-2.47%,5.29%)
	Female	10-24	2686854.88(2103348.13,3372700.07)	26.87(21.03, 33.73)	2817.118213 (2205.322061,3536.214358)	2860.99(1887.49,4041.28)	22758662.22(18089979.91,28336934.45)	22.76(18.09, 28.34)	23862.04125 (18967.0132,29710.7577)	23219.33(17523.82,29621.15)	824402.82(62341.45,1993514.03)	0.82 (0.06, 1.99)	864.3712874 (65.36387141,2090.163018)	840.75(60.41,2017.95)	2628766.06(2054205.93,3259583.07)	2.63(2.05, 3.26)	2927.811586 (2287.89013,3630.389648)	2967.97(1966.00,4193.74)	21801997.37(17043887.82,27232013.05)	21.80(17.04, 27.23)	24282.16855 (18982.78171,30329.89683)	23755.98(17954.57,30439.48)	785634.53(55369.08,1905717.36)	0.79(0.06, 1.91)	875.0074449 (61.66780316,2122.50967)	855.94(61.37,2052.78)	0.14(0.11,0.18)	0.12(0.06,0.18)	0.12(0.05,0.18)	0.1198 (0.1104,0.1292)	0	0.1548001(0.1021204,0.2075075)	0.1782141(0.1405727,0.2158696)	0.1782883(0.1428995,0.2136895)	3.93% (1.44%,6.88%)	1.76% (-1.05%,4.62%)	1.23% (-3.24%,5.39%)
	Male	10-24	1334817.30(1030526.17,1649512.30)	1.33(1.03, 1.65)	1328.422275 (1025.588985,1641.609589)	1356.72(889.72,1916.36)	11902250.23(9119435.23,15011987.18)	11.90(9.12, 15.01)	11845.22729 (9075.744588,14940.06568)	11592.63(8621.49,15043.44)	435476.67(40605.36,1073740.31)	0.44 (0.04, 1.07)	433.3903259 (40.41081766,1068.596088)	423.78(39.68,1046.68)	1336595.24(1025662.67,1655124.80)	1.34(1.03, 1.66)	1395.356778 (1070.754491,1727.89005)	1420.53(942.86,2015.79)	11710616.88(8972359.34,14805511.66)	11.71(8.97, 14.81)	12225.45779 (9366.816581,15456.4153)	11992.42(8977.13,15558.43)	427937.50(38698.90,1047206.24)	0.43(0.04, 1.05)	446.7511765 (40.40024243,1093.245205)	438.00(39.59,1069.11)	0.18(0.14,0.21)	0.15(0.11,0.20)	0.15(0.11,0.20)	0.1496 (0.142,0.1572)	0	0.2072825(0.1719456,0.2426319)	0.1862239(0.1734198,0.1990297)	0.1866243(0.1701067,0.2031446)	5.04% (2.48%,7.90%)	3.21% (0.27%,6.07%)	3.08% (-2.20%,8.11%)
High- middle SDI	Both	10-24	4696034.24(3648771.45,5807342.76)	4.70(3.65, 5.81)	1654.789245 (1285.754628,2046.392307)	1682.63(1115.20,2373.14)	40464326.03(31381364.73,50868362.63)	40.46(31.38, 50.87)	14258.82524 (11058.16998,17925.00121)	13971.56(10572.50,17921.71)	1514520.94(147900.42,3614575.39)	1.51 (0.15, 3.61)	533.687116 (52.11717072,1273.704614)	522.35(51.48,1250.48)	3893188.47(3043370.75,4776575.12)	3.89(3.04, 4.78)	1723.563941 (1347.338849,2114.650421)	1733.13(1143.26,2443.34)	33222161.11(25700883.62,41798565.49)	33.22(25.70, 41.80)	14707.87231 (11378.10732,18504.75537)	14600.53(10952.23,18769.41)	1244458.50(116794.11,3004428.22)	1.24(0.12, 3.00)	550.9375687 (51.70623535,1330.098499)	546.76(52.57,1316.75)	0.16(-0.36,0.68)	0.19(-0.32,0.70)	0.20(-0.30,0.71)	0.0943 (0.0694,0.1191)	0	0.1416115(0.1038748,0.1793624)	0.1949749(0.1761563,0.2137971)	0.2069764(0.1855331,0.2284243)	4.16% (1.70%,6.67%)	3.15% (0.82%,5.33%)	3.23% (-2.73%,7.10%)
	Female	10-24	2967993.29(2303137.11,3653256.30)	2.97(2.30, 3.65)	2132.006566 (1654.418651,2624.253382)	2168.44(1421.47,3057.38)	25510832.23(19912089.06,31904898.59)	25.51(19.91, 31.90)	18325.26444 (14303.50426,22918.33125)	17933.10(13576.97,22938.61)	951185.80(86532.43,2294068.17)	0.95 (0.09, 2.29)	683.2678449 (62.15907469,1647.904133)	668.01(61.18,1599.35)	2393398.99(1872818.82,2953153.40)	2.39(1.87, 2.95)	2228.084035 (1743.46097,2749.17554)	2239.05(1462.17,3160.57)	20285632.86(15801333.49,25357008.84)	20.29(15.80, 25.36)	18884.47976 (14709.91636,23605.5697)	18749.35(14029.02,24085.45)	757336.30(69338.29,1836191.13)	0.76(0.07, 1.84)	705.0261723 (64.54901192,1709.3632)	699.85(63.76,1683.18)	0.15(0.10,0.19)	0.17(0.13,0.20)	0.18(0.15,0.21)	0.1014 (0.076,0.1268)	0	0.1557355(0.1270287,0.1844504)	0.1985878(0.1817583,0.21542)	0.2108411(0.1923319,0.2293537)	4.51% (1.26%,7.42%)	3.05% (-0.26%,5.73%)	3.18% (-3.40%,7.85%)
	Male	10-24	1728040.95(1338194.47,2138091.33)	1.73(1.34, 2.14)	1195.270873 (925.6174579,1478.89915)	1215.89(808.93,1725.75)	14953493.79(11519297.88,18920420.51)	14.95(11.52, 18.92)	10343.20139 (7967.797997,13087.09004)	10151.84(7619.28,13103.48)	563335.14(61389.62,1344728.31)	0.56 (0.06, 1.34)	389.6540094 (42.46266288,930.1368546)	381.90(42.31,928.21)	1499789.49(1163612.58,1850677.94)	1.50(1.16, 1.85)	1266.06685 (982.2787295,1562.27391)	1274.11(842.04,1803.30)	12936528.25(9938661.88,16417454.49)	12.94(9.94, 16.42)	10920.539 (8389.851013,13859.00827)	10841.10(8088.70,14011.24)	487122.19(50029.50,1157784.52)	0.49(0.05, 1.16)	411.2105515 (42.23305251,977.3588981)	408.05(42.20,980.15)	0.20(0.16,0.24)	0.24(0.20,0.28)	0.24(0.20,0.29)	0.15 (0.1197,0.1803)	0	0.2126169(0.1592346,0.2660276)	0.2795026(0.2531698,0.3058424)	0.2898256(0.2557265,0.3239363)	5.92% (2.46%,9.30%)	5.58% (2.28%,8.77%)	5.53% (-3.37%,11.08%)
Middle SDI	Both	10-24	9570278.57(7585856.74,11641448.37)	9.57(7.59, 11.64)	1743.770767 (1382.195421,2121.15219)	1766.25(1188.17,2458.48)	85013021.18(66959217.04,106029528.00)	85.01(66.96, 106.03)	15489.95884 (12200.4312,19319.31133)	15356.36(11683.90,19599.29)	3160638.75(241400.11,7557824.58)	3.16 (0.24, 7.56)	575.8901816 (43.9847649,1377.087769)	570.65(43.70,1394.79)	10090570.85(8049203.38,12292941.62)	10.09(8.05, 12.29)	1825.538082 (1456.223589,2223.980525)	1834.41(1228.13,2558.20)	90958861.47(70952688.32,113481519.60)	90.96(70.95, 113.48)	16455.84456 (12836.42288,20530.53674)	16388.79(12442.87,20941.49)	3380477.74(247317.01,8152235.28)	3.38(0.25, 8.15)	611.5799531 (44.74341741,1474.863631)	609.01(45.96,1489.18)	0.15(-0.28,0.59)	0.23(-0.23,0.69)	0.23(-0.21,0.68)	0.1184 (0.0854,0.1514)	0	0.1422236(0.1128219,0.1716339)	0.2086014(0.1871001,0.2301073)	0.216155(0.1927002,0.2396153)	4.69% (2.92%,6.34%)	6.24% (4.02%,8.12%)	6.20% (0.65%,8.53%)
	Female	10-24	5849766.28(4655430.99,7130735.09)	5.85(4.66, 7.13)	2166.356694 (1724.055904,2640.740664)	2197.80(1467.34,3053.29)	52684711.55(41946614.00,65563540.96)	52.68(41.95, 65.56)	19510.84402 (15534.18096,24280.28898)	19331.67(14757.20,24608.75)	1948979.36(136878.05,4673233.37)	1.95 (0.14, 4.67)	721.7697747 (50.69034732,1730.648695)	714.90(49.37,1754.58)	6017485.09(4818841.96,7346978.38)	6.02(4.82, 7.35)	2252.224522 (1803.596331,2749.827317)	2266.74(1514.62,3160.69)	54964692.77(43196166.24,68340422.19)	54.96(43.19, 68.34)	20572.18706 (16167.46256,25578.45552)	20467.05(15562.74,26113.49)	2034177.49(139775.92,4906414.61)	2.03(0.14, 4.91)	761.3520211 (52.31533563,1836.373023)	757.40(53.25,1840.57)	0.12(0.09,0.14)	0.19(0.18,0.20)	0.20(0.18,0.21)	0.0981 (0.0714,0.1249)	0	0.1149964(0.0904175,0.1395813)	0.1836761(0.1610125,0.2063449)	0.1949256(0.1712566,0.2186002)	3.96% (1.29%,6.24%)	5.44% (2.70%,7.54%)	5.48% (1.30%,9.21%)
	Male	10-24	3720512.29(2933467.25,4558667.99)	3.72(2.93, 4.56)	1334.479309 (1052.180733,1635.110339)	1349.64(907.55,1888.78)	32328309.63(25247563.16,40538233.60)	32.33(25.25, 40.54)	11595.56989 (9055.836405,14540.31858)	11502.18(8721.66,14773.24)	1211659.39(105963.65,2927160.70)	1.21 (0.11, 2.93)	434.5999315 (38.00721238,1049.918689)	430.81(37.78,1045.92)	4073085.77(3204242.39,5014073.72)	4.07(3.20, 5.01)	1426.323308 (1122.069574,1755.840812)	1431.23(960.47,1999.85)	35994168.70(28163024.62,45012942.64)	35.99(28.16, 45.01)	12604.52756 (9862.19804,15762.74426)	12566.77(9495.61,16090.19)	1346300.25(108884.48,3276945.06)	1.35(0.11, 3.28)	471.4507698 (38.1294366,1147.528776)	469.96(38.21,1156.30)	0.20(0.18,0.23)	0.28(0.27,0.30)	0.28(0.27,0.30)	0.1852 (0.1566,0.2137)	0	0.2087394(0.1695729,0.2479213)	0.2755008(0.2557012,0.2953043)	0.2762803(0.2528265,0.2997396)	6.88% (4.34%,9.31%)	8.70% (5.58%,11.47%)	8.48% (-2.78%,12.42%)
Low- middle SDI	Both	10-24	6977923.17(5562408.33,8510899.77)	6.98(5.56, 8.51)	1929.133093 (1537.796523,2352.943418)	1902.73(1262.20,2662.67)	61508384.53(48181259.54,77011725.01)	61.51(48.18, 77.01)	17004.75303 (13320.30463,21290.84309)	17165.94(12930.95,22035.08)	2248677.46(160833.58,5426783.76)	2.25 (0.16, 5.43)	621.6746743 (44.4644318,1500.301436)	627.85(45.31,1528.45)	10365876.81(8265955.91,12729995.24)	10.37(8.27, 12.73)	1875.34422 (1495.436701,2303.049074)	1884.19(1259.96,2631.49)	94334638.99(74073265.19,117364712.10)	94.33(74.07, 117.36)	17066.56592 (13400.97632,21233.05518)	17013.66(12916.84,21786.73)	3467951.73(246874.39,8410857.48)	3.47(0.25, 8.41)	627.4050275 (44.66331935,1521.651593)	625.36(45.56,1525.92)	-0.04(-0.40,0.32)	-0.03(-0.43,0.38)	-0.01(-0.40,0.39)	-0.0315 (-0.035,-0.0279)	0	-0.03977921(-0.07892142,-0.000621657)	-0.04397356(-0.06378168,-0.02416151)	-0.01689686(-0.03727239,0.00348282)	-2.79% (-5.22%,-0.36%)	0.36% (-2.48%,2.65%)	0.92% (-2.36%,6.26%)
	Female	10-24	4121500.90(3296479.81,5047795.02)	4.12(3.30, 5.05)	2309.618146 (1847.290528,2828.697421)	2282.31(1512.07,3190.71)	37215459.83(29370364.15,46543392.25)	37.22(29.37, 46.54)	20854.90296 (16458.64641,26082.1157)	21003.98(15845.01,26929.25)	1356456.67(92342.91,3255844.60)	1.36 (0.09, 3.26)	760.1349645 (51.74737892,1824.519261)	765.76(54.38,1858.01)	6063890.24(4834982.25,7480829.39)	6.06(4.83, 7.48)	2234.852933 (1781.937639,2757.067301)	2250.88(1495.46,3161.21)	56385851.72(44875671.49,69988409.49)	56.39(44.88, 69.99)	20781.06317 (16538.9745,25794.29971)	20690.07(15752.66,26401.77)	2064904.15(146648.65,5022336.52)	2.06(0.15, 5.02)	761.0225318 (54.04751022,1850.987248)	757.58(54.91,1841.78)	-0.06(-0.07,-0.04)	-0.05(-0.07,-0.03)	-0.03(-0.05,-0.01)	-0.0445 (-0.0538,-0.0352)	0	-0.04801933(-0.09409458,-0.001922838)	-0.06647401(-0.08823842,-0.04470485)	-0.03973892(-0.06151538,-0.01795772)	-3.24% (-6.29%,-0.31%)	-0.35% (-3.91%,2.76%)	0.12% (-3.79%,6.69%)
	Male	10-24	2856422.27(2260283.31,3495994.86)	2.86(2.26, 3.50)	1558.642682 (1233.351973,1907.6335)	1535.01(1021.03,2157.17)	24292924.69(18986940.78,30352680.18)	24.29(18.99, 30.35)	13255.73944 (10360.46269,16562.32113)	13416.32(10099.09,17310.02)	892220.79(66369.52,2180058.64)	0.89 (0.07, 2.18)	486.8514812 (36.21535939,1189.576374)	493.13(35.59,1203.73)	4301986.58(3395256.49,5258049.45)	4.30(3.39, 5.26)	1528.712327 (1206.505497,1868.44958)	1532.47(1023.20,2144.54)	37948787.27(29534585.15,47618864.45)	37.95(29.53, 47.62)	13485.11388 (10495.12442,16921.37895)	13462.23(10152.42,17348.46)	1403047.57(100225.74,3403207.63)	1.40(0.10, 3.40)	498.5734114 (35.61524978,1209.330936)	497.66(35.92,1210.24)	-0.02(-0.05,0.00)	0.00(-0.01,0.01)	0.02(0.01,0.04)	-0.0055 (-0.0109,0)	0.048347	-0.01835793(-0.05200684,0.01530231)	0.001546807(-0.01867987,0.02177758)	0.02841097(0.007055051,0.04977144)	-1.92% (-4.89%,1.37%)	1.73% (-1.82%,5.41%)	2.41% (-2.20%,7.62%)
Low SDI	Both	10-24	2580924.60(2028559.12,3162615.81)	2.58(2.03, 3.16)	1658.046969 (1303.194331,2031.739158)	1625.16(1058.45,2300.16)	21750428.13(16746211.23,27394697.66)	21.75(16.75, 27.40)	13972.98917 (10758.16195,17599.00134)	14238.57(10603.60,18453.94)	792195.23(69845.18,1912079.88)	0.79 (0.07, 1.91)	508.9249405 (44.87019527,1228.365315)	519.19(47.44,1252.12)	6079489.08(4755969.94,7485557.58)	6.08(4.76, 7.49)	1645.700325 (1287.427473,2026.319049)	1626.58(1064.06,2303.44)	51820792.91(39902946.28,65466946.87)	51.82(39.90, 65.47)	14027.74058 (10801.61355,17721.71547)	14189.03(10582.12,18432.64)	1904862.12(167749.05,4608310.01)	1.90(0.17, 4.61)	515.6407343 (45.40918743,1247.456353)	521.91(47.65,1263.41)	0.00(-0.34,0.35)	-0.01(-0.38,0.36)	0.03(-0.33,0.38)	0.0038 (-0.0111,0.0186)	0.62005	0.01260098(-0.006008006,0.03121343)	-0.01100392(-0.01928385,-0.002723309)	0.02767073(0.01902447,0.03631773)	-0.74% (-2.38%,0.69%)	0.39% (-1.52%,2.11%)	1.32% (-1.43%,4.41%)
	Female	10-24	1520384.28(1194935.51,1875936.43)	1.52(1.19, 1.88)	1965.064622 (1544.428949,2424.608267)	1930.59(1253.54,2736.62)	13019931.81(10062138.11,16456045.66)	13.02(10.06, 16.46)	16827.98727 (13005.10129,21269.09195)	17083.05(12757.46,22166.06)	472249.51(41070.62,1147640.95)	0.47 (0.04, 1.15)	610.3725303 (53.08291078,1483.301722)	620.11(56.13,1491.86)	3590493.29(2815297.89,4422406.18)	3.59(2.82, 4.42)	1952.202477 (1530.717669,2404.525393)	1933.31(1251.24,2744.94)	30979415.47(23925311.98,38980256.11)	30.98(23.93, 38.98)	16843.9506 (13008.53379,21194.12191)	17000.23(12692.29,22025.64)	1133079.04(98558.54,2740803.51)	1.13(0.10, 2.74)	616.0712546 (53.58768771,1490.214007)	622.05(57.20,1505.31)	0.01(-0.01,0.02)	-0.01(-0.02,-0.01)	0.02(0.02,0.03)	0.0048 (-0.0137,0.0233)	0.611724	0.01636358(-0.00668078,0.03941326)	-0.01864893(-0.02915463,-0.008142135)	0.01980166(0.008603965,0.03100061)	-0.65% (-2.85%,1.18%)	0.09% (-2.24%,2.12%)	0.93% (-2.36%,4.50%)
	Male	10-24	1060540.31(830178.56,1309831.33)	1.06(0.83, 1.31)	1354.633697 (1060.39143,1673.054419)	1324.43(866.45,1881.13)	8730496.32(6708361.19,11031454.07)	8.73(6.71, 11.03)	11151.50868 (8568.624889,14090.53407)	11405.67(8483.81,14819.85)	319945.72(29112.08,770036.55)	0.32 (0.03, 0.77)	408.6683429 (37.18501447,983.5717233)	418.71(38.00,1015.10)	2488995.79(1938834.74,3077879.79)	2.49(1.94, 3.08)	1341.80271 (1045.214186,1659.266545)	1323.21(863.97,1876.91)	20841377.44(16015830.85,26378112.95)	20.84(16.02, 26.38)	11235.46163 (8634.038395,14220.28255)	11388.31(8446.73,14842.05)	771783.08(68614.63,1858348.52)	0.77(0.07, 1.86)	416.0636341 (36.98973388,1001.824549)	422.14(37.95,1019.44)	-0.00(-0.02,0.02)	-0.00(-0.02,0.01)	0.03(0.02,0.05)	-0.0026 (-0.014,0.0088)	0.652861	0.006324917(-0.004417112,0.0170681)	-0.0005110572(-0.005580528,0.00455867)	0.03827007(0.02466353,0.05187846)	-0.95% (-2.72%,1.07%)	0.75% (-1.48%,3.43%)	1.81% (-1.85%,6.31%)
Andean Latin America	Both	10-24	158162.44(125559.03,194187.60)	0.16(0.13, 0.19)	1284.790301 (1019.945215,1577.431097)	1265.28(833.00,1799.08)	1577509.29(1229556.45,2000199.15)	1.58(1.23, 2.00)	12814.47523 (9987.973256,16248.08334)	12844.52(9665.32,16574.95)	57814.88(5745.47,138492.80)	0.06 (0.01, 0.14)	469.6437692 (46.67175819,1125.009297)	471.08(44.59,1137.04)	225265.80(176489.14,279407.68)	0.23(0.18, 0.28)	1304.809506 (1022.27991,1618.416118)	1328.34(853.18,1903.65)	2327964.15(1772965.53,3003887.54)	2.33(1.77, 3.00)	13484.29169 (10269.56721,17399.44998)	13438.92(9902.88,17761.31)	85573.46(8129.77,205218.78)	0.09(0.008, 0.21)	495.6680625 (47.09016742,1188.690914)	493.67(44.51,1210.01)	0.20(-0.35,0.76)	0.20(-0.40,0.81)	0.21(-0.38,0.81)	0.1553 (0.1422,0.1684)	0	0.1732239(0.1103858,0.2361015)	0.1607156(0.1328823,0.1885567)	0.1777865(0.1423358,0.2132499)	1.56% (-3.18%,7.53%)	5.23% (-1.64%,13.12%)	5.54% (-5.97%,15.50%)
	Female	10-24	102724.49(82591.29,124934.82)	0.10(0.83, 1.25)	1659.758266 (1334.458653,2018.618962)	1642.09(1086.93,2319.24)	1047132.66(823380.92,1319878.43)	1.05(0.82, 1.32)	16918.9172 (13303.67598,21325.77341)	16936.86(12839.36,21731.01)	38191.01(3539.85,92066.84)	0.04 (0.00, 0.09)	617.0665276 (57.19467078,1487.558595)	617.96(54.26,1494.88)	142628.93(112238.97,175383.89)	0.14(0.11, 0.18)	1706.368386 (1342.792279,2098.23858)	1739.65(1120.82,2493.86)	1502315.94(1150989.41,1931668.78)	1.50(1.15, 1.93)	17973.24349 (13770.08144,23109.88816)	17923.30(13263.77,23595.29)	54930.98(4988.51,130561.71)	0.05(0.005, 0.13)	657.1772096 (59.68104687,1561.999991)	655.02(55.88,1588.18)	0.21(0.17,0.26)	0.21(0.17,0.25)	0.22(0.18,0.27)	0.1871 (0.1687,0.2055)	0	0.205874(0.1360989,0.2756978)	0.1989475(0.1651768,0.2327294)	0.2157286(0.1718618,0.2596146)	2.81% (-2.96%,9.48%)	6.23% (-2.79%,15.26%)	6.50% (-6.34%,17.66%)
	Male	10-24	55437.95(43280.47,70350.65)	0.06(0.43, 0.70)	905.6644142 (707.0532654,1149.286415)	887.81(581.61,1274.93)	530376.63(407994.04,688699.62)	0.53(0.41, 0.69)	8664.520159 (6665.211757,11250.97026)	8701.41(6454.84,11493.45)	19623.88(2167.29,46956.12)	0.02 (0.00, 0.05)	320.5862778 (35.40603782,767.1005818)	322.38(33.30,788.25)	82636.87(63607.24,103958.65)	0.08(0.06, 0.10)	927.9158858 (714.2352163,1167.334566)	943.43(594.49,1367.30)	825648.21(620571.73,1088971.98)	0.83(0.62, 1.09)	9271.068236 (6968.298055,12227.88762)	9233.14(6708.02,12355.74)	30642.48(3136.71,75095.59)	0.03(0.003, 0.08)	344.0794158 (35.22160274,843.2360654)	342.35(33.60,848.22)	0.22(0.17,0.27)	0.22(0.17,0.26)	0.23(0.18,0.28)	0.1981 (0.1785,0.2177)	0	0.2138905(0.1651605,0.2626443)	0.2012176(0.1811639,0.2212753)	0.2171248(0.1568584,0.2774274)	2.46% (-4.05%,9.60%)	7.00% (0.03%,15.20%)	7.33% (-5.85%,19.99%)
Australasia	Both	10-24	89793.14(67386.77,114826.16)	0.09(0.67, 1.15)	1866.365762 (1400.645622,2386.681416)	1888.63(1196.90,2720.96)	738974.56(558022.64,942903.17)	0.74(0.56, 0.94)	15359.71268 (11598.5961,19598.40389)	15018.86(10871.52,19830.42)	26341.79(2301.64,66005.85)	0.03 (0.00, 0.07)	547.5185773 (47.84005464,1371.94279)	535.17(45.59,1331.47)	107241.57(80617.46,135814.04)	0.11(0.08, 0.14)	1869.242526 (1405.178835,2367.266504)	1883.98(1194.24,2714.07)	870907.67(660872.93,1111975.38)	0.87(0.66, 1.11)	15180.09901 (11519.15049,19381.95854)	14979.78(10846.02,19779.84)	31128.99(2703.15,77564.57)	0.03(0.003, 0.08)	542.5845882 (47.11652494,1351.966275)	535.52(44.07,1320.28)	0.00(-0.49,0.49)	0.00(-0.42,0.42)	0.01(-0.40,0.42)	-0.008 (-0.0108,-0.0052)	0	0.001100426(-0.02971013,0.03192048)	0.0002355515(-0.01088248,0.01135482)	0.007858622(-0.05105291,0.06680488)	0.15% (-1.42%,1.69%)	-1.17% (-1.77%,-0.53%)	-0.90% (-8.24%,6.26%)
	Female	10-24	56074.64(41528.27,71457.55)	0.06(0.42, 0.71)	2373.541652 (1757.819381,3024.673516)	2397.70(1509.60,3493.71)	448888.10(338558.61,577358.72)	0.45(0.34, 0.58)	19000.65033 (14330.59543,24438.58773)	18514.92(13415.04,24489.27)	15924.98(1308.18,39179.73)	0.02 (0.00, 0.04)	674.076621 (55.37285491,1658.409789)	656.71(52.11,1607.56)	66369.20(49521.56,83603.42)	0.07(0.05, 0.08)	2380.300285 (1776.06774,2998.397471)	2397.63(1509.33,3493.98)	524012.95(396076.85,673438.89)	0.52(0.39, 0.67)	18793.47994 (14205.11124,24152.57147)	18516.01(13415.42,24490.31)	18637.61(1480.11,45158.49)	0.02(0.001, 0.05)	668.4290209 (53.08346423,1619.587994)	658.77(52.18,1641.74)	0.00(-0.00,0.01)	0.00(-0.00,0.01)	0.01(0.00,0.02)	3e-04 (-0.0013,0.0019)	0.745692	0.007621798(-0.03132516,0.04658393)	0.005765656(-0.008635481,0.02016887)	0.01757363(-0.05890198,0.09410777)	0.28% (-1.34%,1.78%)	-1.09% (-1.71%,-0.41%)	-0.84% (-10.31%,7.53%)
	Male	10-24	33718.50(25420.89,42932.02)	0.03(0.25, 0.43)	1377.032974 (1038.166105,1753.304703)	1398.28(885.23,2029.27)	290086.46(220007.64,370567.17)	0.29(0.22, 0.37)	11846.86791 (8984.912682,15133.62708)	11631.89(8422.03,15458.24)	10416.81(971.20,26418.13)	0.01 (0.00, 0.03)	425.4130091 (39.66287286,1078.892616)	417.43(38.63,1066.94)	40872.37(31148.42,51224.16)	0.04(0.03, 0.05)	1386.022246 (1056.273362,1737.061654)	1398.49(885.73,2029.18)	346894.72(263899.30,442735.14)	0.35(0.26, 0.44)	11763.54009 (8949.083914,15013.58272)	11634.29(8427.59,15461.98)	12491.38(1220.67,31213.99)	0.01(0.001, 0.03)	423.594942 (41.39427074,1058.497104)	418.92(37.52,1053.97)	0.00(-0.00,0.01)	0.00(-0.00,0.01)	0.01(0.01,0.02)	0.0011 (-0.0014,0.0037)	0.372563	0.0112018(-0.03925142,0.06168048)	0.008382635(-0.009138466,0.02590681)	0.009417328(-0.08308231,0.1020026)	0.65% (-0.91%,2.25%)	-0.70% (-1.31%,-0.12%)	-0.43% (-10.20%,11.20%)
Caribbean	Both	10-24	190801.86(150134.96,238076.37)	0.19(0.15, 0.24)	1786.739681 (1405.919697,2229.435793)	1825.27(1174.47,2612.98)	2008300.61(1524127.94,2571297.41)	2.01(1.52, 2.57)	18806.47478 (14272.50153,24078.58642)	18712.39(13582.94,24756.44)	73787.69(4785.87,176527.88)	0.07 (0.00, 0.18)	690.9753867 (44.81666982,1653.072795)	687.28(43.97,1673.53)	201249.95(158740.72,249932.49)	0.20(0.16, 0.25)	1776.648262 (1401.37382,2206.42098)	1817.45(1169.24,2601.49)	2119137.46(1609934.01,2710829.21)	2.12(1.61, 2.71)	18707.88943 (14212.60682,23931.3845)	18616.64(13514.89,24625.67)	77811.31(5146.58,187895.35)	0.08(0.005, 0.19)	686.9235311 (45.4343184,1658.752891)	683.34(43.32,1661.62)	-0.01(-0.48,0.47)	-0.01(-0.55,0.53)	-0.00(-0.53,0.53)	-0.014 (-0.0153,-0.0128)	0	-0.01969194(-0.04256998,0.003191332)	-0.02240126(-0.02900083,-0.01580125)	-0.01969108(-0.05412543,0.01475515)	-0.56% (-1.13%,0.16%)	-0.52% (-0.75%,-0.24%)	-0.59% (-3.85%,3.72%)
	Female	10-24	120335.55(95171.05,151899.14)	0.12(0.95, 1.52)	2238.624185 (1770.484376,2825.807458)	2294.32(1477.16,3274.36)	1300246.23(989169.90,1656713.96)	1.30(0.99, 1.66)	24188.71789 (18401.70819,30820.152)	24071.54(17454.56,31707.58)	47614.45(3106.51,115415.10)	0.05 (0.00, 0.12)	885.7803164 (57.7908822,2147.088089)	881.27(54.44,2131.40)	125396.22(99514.57,157761.05)	0.13(0.10, 0.16)	2238.528059 (1776.498219,2816.293289)	2294.32(1477.16,3274.36)	1354460.20(1030303.35,1724884.01)	1.35(1.03, 1.72)	24179.33432 (18392.6034,30792.0065)	24071.54(17454.56,31707.58)	49489.40(3173.79,120197.90)	0.05(0.003, 0.12)	883.4669625 (56.65735784,2145.729523)	879.37(54.99,2131.85)	-0.00(-0.00,0.00)	0.00(0.00,0.00)	-0.00(-0.01,0.00)	0 (0,0)	0	-3.946843e-11(-0.02890206,0.02891041)	3.768097e-11(-0.008222834,0.00822351)	-0.0008315677(-0.04381731,0.04217266)	0.00% (-0.53%,0.70%)	-0.04% (-0.21%,0.18%)	-0.26% (-4.89%,5.02%)
	Male	10-24	70466.31(54148.05,89439.60)	0.07(0.54, 0.89)	1328.713731 (1021.016364,1686.474278)	1352.46(861.80,1971.44)	708054.38(535444.98,909659.55)	0.71(0.54, 0.91)	13351.08298 (10096.35774,17152.55272)	13281.03(9762.29,17681.28)	26173.24(1774.65,64207.35)	0.03 (0.00, 0.07)	493.522913 (33.4627512,1210.694649)	490.69(32.27,1205.37)	75853.73(58420.17,95894.44)	0.08(0.06, 0.09)	1324.775465 (1020.300667,1674.783723)	1352.46(861.80,1971.44)	764677.26(578618.32,981431.49)	0.76(0.58, 0.98)	13354.98783 (10105.49294,17140.57212)	13281.03(9762.29,17681.28)	28321.91(1911.63,69199.85)	0.03(0.002, 0.07)	494.6383723 (33.38632975,1208.566204)	491.61(33.21,1209.86)	0.00(0.00,0.00)	-0.00(-0.00,0.00)	0.01(0.01,0.01)	0 (0,0)	0	4.232836e-10(-0.03746755,0.03748159)	4.464651e-10(-0.01107167,0.0110729)	0.007790146(-0.0497761,0.06538955)	-0.30% (-0.94%,0.53%)	0.03% (-0.23%,0.38%)	0.23% (-5.58%,7.56%)
Central Asia	Both	10-24	345735.96(264277.42,440461.60)	0.35(0.26, 0.44)	1743.390328 (1332.631674,2221.048928)	1738.65(1074.38,2569.40)	2910569.98(2185073.14,3779795.14)	2.91(2.19, 3.78)	14676.68999 (11018.33708,19059.79996)	14728.24(10621.75,19520.47)	106154.47(9925.40,263742.68)	0.11 (0.01, 0.26)	535.2890635 (50.04929499,1329.935219)	537.24(50.87,1317.20)	384318.56(295417.32,487549.59)	0.38(0.30, 0.49)	1736.84481 (1335.074841,2203.37516)	1728.71(1068.17,2555.17)	3224895.03(2424237.84,4195137.82)	3.22(2.42, 4.20)	14574.21727 (10955.81988,18959.02023)	14644.16(10557.95,19411.80)	117705.29(10863.45,290387.75)	0.12(0.01, 0.29)	531.9436543 (49.09503567,1312.344792)	534.71(50.30,1323.15)	-0.01(-0.48,0.47)	-0.01(-0.53,0.52)	0.01(-0.50,0.51)	-0.0185 (-0.0191,-0.0179)	0	-0.02207341(-0.03798643,-0.006157859)	-0.02200652(-0.02742535,-0.0165874)	-0.002417167(-0.03084575,0.0260195)	-0.38% (-1.02%,0.51%)	-0.70% (-0.99%,-0.39%)	-0.62% (-4.40%,2.53%)
	Female	10-24	219614.79(168671.44,279615.54)	0.22(0.17, 0.28)	2234.238888 (1715.969504,2844.653237)	2229.81(1371.10,3267.59)	1854690.63(1396265.34,2403448.51)	1.85(1.40, 2.40)	18868.59224 (14204.82799,24451.35008)	18913.90(13732.95,25085.39)	67115.83(6012.63,164874.10)	0.07 (0.01, 0.16)	682.7992122 (61.16913971,1677.3375)	684.50(62.10,1681.03)	240533.78(185204.03,304616.36)	0.24(0.19, 0.30)	2238.466737 (1723.554411,2834.835066)	2229.81(1371.10,3267.59)	2025095.43(1524923.18,2628587.96)	2.03(1.52, 2.63)	18846.03818 (14191.31173,24462.28876)	18913.90(13732.95,25085.39)	73264.74(6416.43,179749.91)	0.07(0.006, 0.18)	681.8197497 (59.71289422,1672.79705)	684.46(60.12,1685.47)	0.00(0.00,0.00)	-0.00(-0.00,0.00)	0.01(0.01,0.01)	0 (0,0)	0.000112	3.885781e-11(-0.0199756,0.01997959)	6.344282e-06(-0.006807719,0.006820872)	0.0140971(-0.02176874,0.0499758)	0.19% (-0.41%,0.97%)	-0.12% (-0.38%,0.15%)	-0.14% (-5.26%,4.36%)
	Male	10-24	126121.17(94437.21,162560.34)	0.13(0.94, 1.63)	1260.993577 (944.208718,1625.322181)	1256.26(773.19,1871.36)	1055879.35(792612.40,1391358.65)	1.06(0.79, 1.39)	10556.96715 (7924.75308,13911.17986)	10604.05(7551.45,14308.91)	39038.64(3934.35,98453.21)	0.04 (0.00, 0.10)	390.3188581 (39.33667698,984.3617655)	392.15(39.56,967.33)	143784.78(108045.98,183925.90)	0.14(0.11, 0.18)	1263.272694 (949.2766811,1615.946823)	1256.26(773.19,1871.36)	1199799.60(900287.29,1579289.75)	1.20(0.90, 1.58)	10541.26903 (7909.796374,13875.4156)	10604.05(7551.45,14308.91)	44440.55(4468.09,110786.58)	0.04(0.004, 0.11)	390.448365 (39.25604818,973.3551699)	393.03(39.09,969.46)	0.00(0.00,0.00)	-0.00(-0.00,0.00)	0.02(0.01,0.02)	0 (0,0)	0	2.83773e-11(-0.02635236,0.0263593)	1.550171e-07(-0.008944492,0.008945602)	0.02703058(-0.01962403,0.07370695)	0.18% (-0.56%,1.30%)	-0.15% (-0.50%,0.22%)	0.03% (-6.26%,6.04%)
Central Europe	Both	10-24	502392.14(386684.54,631618.53)	0.50(0.39, 0.63)	1720.619805 (1324.338154,2163.20133)	1719.14(1102.57,2488.18)	4263307.93(3269777.63,5370853.11)	4.26(3.27, 5.37)	14601.20772 (11198.51139,18394.38837)	14620.48(10727.03,19081.05)	156915.21(17689.14,392747.67)	0.16 (0.02, 0.39)	537.4116896 (60.58273805,1345.103461)	538.14(61.42,1332.20)	309508.13(238088.70,387679.40)	0.31(0.24, 0.39)	1706.57393 (1312.779637,2137.596641)	1716.32(1104.23,2473.30)	2666104.83(2048812.93,3352954.20)	2.67(2.05, 3.35)	14700.43751 (11296.79756,18487.60525)	14591.69(10738.22,19005.67)	98155.43(11256.33,244555.75)	0.10(0.01, 0.24)	541.2119336 (62.06546061,1348.437782)	537.01(62.32,1324.05)	-0.00(-0.56,0.55)	-0.00(-0.54,0.54)	0.01(-0.50,0.52)	-0.0053 (-0.0064,-0.0042)	0	-0.01050773(-0.02583948,0.004826378)	-0.01155289(-0.01687135,-0.006234151)	0.0003645917(-0.02743454,0.02817146)	-0.82% (-2.07%,0.65%)	0.68% (-0.04%,1.48%)	0.71% (-1.52%,3.79%)
	Female	10-24	320821.97(247165.83,406869.40)	0.32(0.25, 0.41)	2244.885651 (1729.492032,2846.984833)	2243.92(1431.59,3228.41)	2704645.35(2064722.36,3382345.54)	2.70(2.06, 3.38)	18925.19895 (14447.46961,23667.26654)	18944.66(13905.09,24599.37)	98370.25(11061.59,246665.69)	0.10 (0.01, 0.25)	688.3255373 (77.40118491,1725.992347)	689.04(75.05,1723.05)	196604.91(152124.48,247915.15)	0.19(0.15, 0.25)	2235.271188 (1729.55729,2818.635514)	2246.80(1441.88,3229.19)	1681140.97(1281801.73,2101938.15)	1.68(1.28, 2.10)	19113.48975 (14573.2599,23897.68268)	18960.71(13959.70,24621.20)	61116.31(7004.13,152818.49)	0.06(0.007, 0.15)	694.8530672 (79.63243604,1737.447795)	689.10(76.19,1704.37)	0.00(-0.00,0.00)	0.00(-0.00,0.00)	0.01(0.00,0.01)	0.0044 (0.0031,0.0057)	0	0.002614802(-0.01653113,0.0217644)	0.001310857(-0.005388389,0.008010552)	0.0111772(-0.02402792,0.04639472)	-0.43% (-1.64%,1.13%)	0.99% (0.19%,1.85%)	0.95% (-1.78%,4.63%)
	Male	10-24	181570.18(139257.30,230113.82)	0.18(0.14, 0.23)	1218.01261 (934.1685323,1543.65402)	1216.15(786.13,1773.14)	1558662.58(1182789.41,2014897.34)	1.56(1.18, 2.01)	10455.85071 (7934.410958,13516.37357)	10471.32(7746.25,13861.01)	58544.96(6853.08,146511.09)	0.06 (0.01, 0.15)	392.7324469 (45.9719387,982.82857)	393.35(46.93,975.65)	112903.22(86517.75,142980.40)	0.11(0.09, 0.14)	1208.729233 (926.2492723,1530.732147)	1216.98(788.98,1770.96)	984963.86(750324.12,1267376.46)	0.98(0.75, 1.27)	10544.91253 (8032.885811,13568.39006)	10475.35(7763.68,13829.68)	37039.12(4442.84,92116.81)	0.04(0.004, 0.09)	396.5366536 (47.56456536,986.1922471)	393.72(47.84,972.02)	-0.00(-0.01,-0.00)	-0.00(-0.00,-0.00)	0.01(0.01,0.01)	0.002 (9e-04,0.0032)	0.000647	-0.001051593(-0.02668673,0.02459011)	-0.003630268(-0.01238051,0.005120737)	0.01032452(-0.03499137,0.05566096)	-0.76% (-2.01%,0.62%)	0.85% (0.09%,1.72%)	0.97% (-2.85%,5.23%)
Central Latin America	Both	10-24	960804.17(771931.53,1153983.55)	0.96(0.77, 1.15)	1770.88764 (1422.770691,2126.942474)	1751.74(1183.24,2437.80)	9465089.55(7507987.95,11830754.80)	9.47(7.51, 11.83)	17445.3969 (13838.2029,21805.62708)	17502.10(13213.98,22463.27)	351536.94(24133.16,854608.96)	0.35 (0.02, 0.85)	647.9285231 (44.48056243,1575.155987)	650.16(46.43,1584.98)	1120692.93(891908.66,1354360.05)	1.12(0.89, 1.35)	1723.265219 (1371.468611,2082.570076)	1754.53(1170.77,2453.39)	11528529.22(9024861.48,14496587.80)	11.53(9.02, 14.50)	17727.16938 (13877.33378,22291.08869)	17639.83(13229.67,22833.67)	428447.54(31402.07,1041340.79)	0.43(0.03, 1.04)	658.8144971 (48.2862858,1601.247145)	655.38(46.49,1604.65)	0.03(-0.53,0.60)	0.06(-0.52,0.65)	0.07(-0.51,0.65)	0.0046 (9e-04,0.0083)	0.015068	0.0005783598(-0.009179437,0.01033711)	0.04560601(0.04272439,0.04848772)	0.04943797(0.03449746,0.06438072)	-2.69% (-5.58%,0.59%)	1.62% (-2.03%,5.05%)	1.68% (-2.28%,8.03%)
	Female	10-24	629780.39(506894.82,758076.66)	0.63(0.51, 0.76)	2293.441294 (1845.934741,2760.65168)	2281.63(1529.48,3193.61)	6266638.97(4972865.09,7793597.35)	6.27(4.97, 7.79)	22820.92091 (18109.44617,28381.57259)	22858.35(17251.91,29158.55)	232555.38(15560.06,564181.89)	0.23 (0.02, 0.56)	846.8858696 (56.66433797,2054.55433)	848.30(57.50,2078.61)	722945.38(578588.57,872215.37)	0.72(0.58, 0.87)	2237.955969 (1791.083781,2700.037427)	2283.64(1514.89,3189.31)	7496129.78(5896045.54,9356043.35)	7.50(5.90, 9.36)	23205.08403 (18251.84945,28962.64851)	23077.84(17359.34,29852.73)	278066.01(19453.15,676084.61)	0.28(0.02, 0.68)	860.7835331 (60.21933051,2092.893367)	855.93(57.63,2095.51)	0.00(0.00,0.01)	0.04(0.04,0.05)	0.05(0.04,0.06)	0.0028 (0.0017,0.004)	1e-06	-0.01030986(-0.02227227,0.001653979)	0.04771139(0.04301814,0.05240486)	0.0519955(0.0335481,0.07044631)	-2.42% (-5.77%,1.28%)	1.68% (-2.52%,6.11%)	1.64% (-3.18%,9.00%)
	Male	10-24	331023.78(262838.41,408865.69)	0.33(0.26, 0.41)	1235.373028 (980.9068192,1525.877224)	1212.38(818.87,1689.88)	3198450.59(2525448.97,4060967.44)	3.20(2.53, 4.06)	11936.54317 (9424.916784,15155.43597)	11989.81(9055.56,15535.36)	118981.56(9119.35,287428.04)	0.12 (0.01, 0.29)	444.0364149 (34.03319518,1072.67475)	446.27(34.96,1076.80)	397747.55(316403.24,485537.56)	0.40(0.32, 0.49)	1215.265086 (966.7283003,1483.495869)	1235.08(828.72,1735.26)	4032399.44(3135998.67,5158092.13)	4.03(3.14, 5.16)	12320.46376 (9581.629635,15759.86908)	12269.04(9145.77,16080.64)	150381.54(11397.72,365256.17)	0.15(0.01, 0.37)	459.4709166 (34.82422236,1115.991978)	457.33(34.48,1124.18)	0.08(0.07,0.10)	0.10(0.09,0.12)	0.11(0.09,0.13)	0.0594 (0.0533,0.0656)	0	0.1005919(0.08364824,0.1175385)	0.1138803(0.1062878,0.1214735)	0.1160398(0.09054244,0.1415437)	-1.63% (-6.30%,3.47%)	3.22% (-2.09%,9.94%)	3.48% (-2.60%,11.28%)
Central Sub-Saharan Africa	Both	10-24	281125.14(214400.79,360318.65)	0.28(0.21, 0.36)	1624.262597 (1238.747923,2081.820584)	1601.40(985.02,2353.09)	2331030.96(1747285.15,3027461.42)	2.33(1.75, 3.03)	13468.04622 (10095.32586,17491.82707)	13680.23(9838.82,18142.78)	84476.33(8096.60,202447.64)	0.08 (0.01, 0.20)	488.0806759 (46.77988555,1169.68596)	496.21(47.07,1199.12)	731002.66(555950.77,936853.50)	0.73(0.56, 0.94)	1626.476383 (1236.987016,2084.493224)	1600.84(984.63,2352.32)	6038831.52(4523707.30,7844112.35)	6.04(4.52, 7.84)	13436.36272 (10065.22071,17453.10137)	13676.68(9836.21,18138.12)	221199.82(20958.21,532938.29)	0.22(0.02, 0.53)	492.1682377 (46.63189058,1185.784399)	501.41(49.12,1206.10)	-0.00(-0.34,0.34)	0.00(-0.36,0.36)	0.05(-0.30,0.40)	-0.0012 (-0.0021,-3e-04)	0.008532	-0.0002633093(-0.01543569,0.01491138)	-0.0004398346(-0.005422739,0.004543318)	0.05598276(0.02983114,0.08214122)	0.14% (-0.20%,0.43%)	-0.24% (-0.43%,-0.09%)	0.84% (-4.52%,6.99%)
	Female	10-24	166310.80(128469.13,213531.14)	0.17(0.13, 0.21)	1928.970006 (1490.060188,2476.659091)	1902.19(1169.90,2814.33)	1390208.04(1053554.98,1809578.20)	1.39(1.05, 1.81)	16124.44653 (12219.74729,20988.54702)	16368.76(11877.36,21750.78)	50187.42(4636.45,120984.43)	0.05 (0.00, 0.12)	582.1031186 (53.77629894,1403.248241)	591.32(54.73,1435.55)	431762.59(333074.83,555500.75)	0.43(0.33, 0.56)	1931.700955 (1490.173051,2485.304097)	1902.19(1169.90,2814.33)	3597618.71(2726418.77,4685103.96)	3.60(2.73, 4.69)	16095.70568 (12197.96694,20961.10245)	16368.76(11877.36,21750.78)	131086.93(11953.54,315683.99)	0.13(0.01, 0.32)	586.4814709 (53.48000607,1412.366626)	596.81(55.04,1442.48)	-0.00(-0.00,0.00)	0.00(0.00,0.00)	0.04(0.04,0.05)	0 (0,0)	0.000203	5.127454e-10(-0.01970952,0.01971341)	-3.785083e-10(-0.00645133,0.006451746)	0.05309653(0.01916334,0.08704123)	0.14% (-0.20%,0.42%)	-0.18% (-0.38%,-0.05%)	0.75% (-6.77%,9.11%)
	Male	10-24	114814.34(86061.28,149711.71)	0.11(0.86, 1.50)	1321.813643 (990.7905847,1723.573677)	1302.85(793.83,1912.91)	940822.92(689186.79,1213694.67)	0.94(0.69, 1.21)	10831.33482 (7934.344175,13972.80305)	11009.24(7809.01,14762.70)	34288.91(3401.33,81416.10)	0.03 (0.00, 0.08)	394.7551162 (39.15819117,937.3124212)	401.73(40.19,961.73)	299240.07(223906.35,389709.77)	0.30(0.22, 0.39)	1324.509152 (991.0638436,1724.949998)	1302.85(793.83,1912.91)	2441212.81(1787558.76,3150728.71)	2.44(1.79, 3.15)	10805.40012 (7912.168718,13945.88962)	11009.24(7809.01,14762.70)	90112.89(8532.94,216498.41)	0.09(0.009, 0.22)	398.8615101 (37.76885385,958.2744889)	406.88(40.87,987.44)	-0.00(-0.00,0.00)	-0.00(-0.00,0.00)	0.05(0.04,0.06)	0 (0,0)	0	1.435074e-10(-0.0237699,0.02377555)	8.668621e-11(-0.007845234,0.00784585)	0.06137623(0.02033894,0.1024304)	0.20% (-0.13%,0.51%)	-0.24% (-0.44%,-0.07%)	1.04% (-8.31%,11.06%)
East Asia	Both	10-24	5156131.71(4015394.52,6386700.23)	5.16(4.02, 6.39)	1385.389184 (1078.887128,1716.027814)	1414.26(936.38,1992.06)	43235732.95(34122614.99,54231836.05)	43.24(34.12, 54.23)	11616.90976 (9168.327033,14571.42744)	11166.29(8471.76,14459.65)	1611888.67(155855.65,3868004.71)	1.61 (0.16, 3.87)	433.094665 (41.87649723,1039.2853)	415.53(39.15,1008.13)	3634270.36(2838514.15,4440531.45)	3.63(2.84, 4.44)	1495.518926 (1168.061596,1827.299063)	1493.36(993.70,2103.32)	28837662.12(22365216.11,36607412.09)	28.84(22.37, 36.61)	11866.83025 (9203.389029,15064.11801)	11891.65(8921.20,15362.06)	1074832.79(95951.28,2603773.75)	1.07(0.10, 2.60)	442.2986243 (39.48439308,1071.464841)	443.31(38.87,1062.96)	0.22(-0.26,0.70)	0.27(-0.22,0.77)	0.28(-0.19,0.75)	0.1738 (0.136,0.2116)	0	0.2173977(0.1708561,0.2639609)	0.2823656(0.2517784,0.312962)	0.2862196(0.259853,0.3125931)	7.95% (1.40%,14.30%)	2.15% (-3.80%,8.22%)	2.13% (-8.80%,8.57%)
	Female	10-24	3186225.00(2478703.14,3935409.23)	3.19(2.48, 3.94)	1756.772147 (1366.669538,2169.845924)	1798.10(1181.72,2514.64)	26923843.01(21233489.21,34033929.60)	26.92(21.23, 34.03)	14844.85796 (11707.39747,18765.10908)	14282.16(10823.21,18536.32)	993450.68(78785.13,2380437.76)	0.99 (0.08, 2.38)	547.7536837 (43.43934288,1312.489472)	526.44(41.35,1280.20)	2158936.88(1698402.70,2629898.44)	2.16(1.70, 2.63)	1902.981167 (1497.046244,2318.107231)	1900.10(1259.64,2677.56)	17170428.55(13417347.85,21620566.36)	17.17(13.42, 21.62)	15134.76488 (11826.6358,19057.31052)	15161.85(11275.98,19566.13)	634947.27(48190.53,1541226.99)	0.63(0.05, 1.54)	559.6702228 (42.47723816,1358.504713)	560.79(41.37,1346.35)	0.19(0.14,0.24)	0.23(0.18,0.28)	0.24(0.20,0.29)	0.1782 (0.1506,0.2059)	0	0.2176453(0.167672,0.2676435)	0.2660157(0.2372096,0.2948301)	0.2752674(0.249135,0.3014066)	8.32% (-0.27%,16.64%)	1.95% (-7.04%,9.97%)	2.18% (-10.15%,11.66%)
	Male	10-24	1969906.72(1516763.33,2434828.19)	1.97(1.52, 2.43)	1032.385514 (794.9028641,1276.040808)	1050.46(694.31,1480.12)	16311889.94(12608877.87,20333667.45)	16.31(12.61, 20.33)	8548.708803 (6608.040249,10656.43543)	8203.62(6228.73,10676.23)	618438.00(73635.92,1497682.23)	0.62 (0.07, 1.50)	324.1099822 (38.59099485,784.9028731)	310.08(36.94,752.51)	1475333.48(1134747.49,1844578.08)	1.48(1.13, 1.84)	1138.722479 (875.8443349,1423.720508)	1137.27(751.70,1619.02)	11667233.57(8948308.52,15144036.10)	11.67(8.95, 15.14)	9005.246158 (6906.669046,11688.78399)	9027.42(6778.71,11728.16)	439885.53(46359.42,1086536.63)	0.44(0.05, 1.09)	339.5215688 (35.78208746,838.6332301)	340.43(36.56,830.96)	0.27(0.21,0.33)	0.35(0.29,0.41)	0.34(0.29,0.40)	0.2565 (0.2127,0.3004)	0	0.3114954(0.2460134,0.3770202)	0.4081297(0.3699429,0.4463311)	0.3998304(0.3654345,0.4342382)	10.30% (1.55%,18.90%)	5.34% (-3.24%,13.14%)	4.76% (-8.83%,14.87%)
Eastern Europe	Both	10-24	794188.26(627500.31,970576.88)	0.79(0.63, 0.97)	1681.582841 (1328.644353,2055.061136)	1687.37(1129.85,2375.32)	6784270.55(5335596.63,8474843.50)	6.78(5.34, 8.47)	14364.74642 (11297.3815,17944.29877)	14297.86(10801.69,18053.72)	260230.68(38869.19,618079.55)	0.26 (0.04, 0.62)	551.0021548 (82.30008515,1308.697225)	548.16(81.34,1316.32)	560749.70(444388.31,682087.81)	0.56(0.44, 0.68)	1699.509196 (1346.843378,2067.258358)	1687.95(1132.84,2373.71)	4676643.05(3674894.62,5846326.07)	4.68(3.67, 5.85)	14173.87806 (11137.79857,17718.93042)	14310.18(10812.94,18070.93)	179129.81(25973.38,427478.22)	0.18(0.03, 0.43)	542.9031244 (78.71962064,1295.59261)	548.69(81.76,1301.23)	0.01(-0.54,0.57)	0.02(-0.52,0.56)	0.03(-0.53,0.60)	0.0015 (-0.0016,0.0047)	0.33855	-0.003283041(-0.01502016,0.008455458)	1.677702e-05(-0.009629404,0.009663888)	0.02118184(0.0002675053,0.04210054)	1.07% (-0.39%,2.31%)	-1.33% (-2.01%,-0.64%)	-1.47% (-3.74%,0.39%)
	Female	10-24	511480.68(403725.96,630866.57)	0.51(0.40, 0.63)	2202.472923 (1738.473276,2716.557267)	2209.40(1470.07,3108.40)	4343999.85(3410433.97,5409871.76)	4.34(3.41, 5.41)	18705.57872 (14685.57625,23295.30053)	18616.74(14050.11,23505.40)	167716.02(25803.82,397122.88)	0.17 (0.03, 0.40)	722.1973441 (111.1131399,1710.039961)	718.39(106.52,1688.74)	358056.87(283705.24,437424.77)	0.36(0.28, 0.44)	2226.730995 (1764.343352,2720.31452)	2213.02(1474.67,3110.76)	2970285.30(2335731.94,3682227.03)	2.97(2.34, 3.68)	18471.99965 (14525.756,22899.5162)	18648.18(14079.35,23548.04)	114371.58(17131.45,270274.52)	0.11(0.02, 0.27)	711.2689852 (106.5393313,1680.818632)	718.81(106.80,1695.32)	-0.00(-0.01,0.01)	0.00(-0.00,0.00)	0.02(0.01,0.03)	0.0048 (0.0021,0.0075)	0.000482	0.00244445(-0.01220028,0.01709132)	0.004997892(-0.0047787,0.01477544)	0.02395176(-0.002247809,0.05015819)	1.10% (-0.35%,2.33%)	-1.25% (-1.89%,-0.55%)	-1.51% (-4.13%,0.64%)
	Male	10-24	282707.58(220836.26,349828.66)	0.28(0.22, 0.35)	1177.673681 (919.9366068,1457.279637)	1182.24(791.94,1655.52)	2440270.70(1919548.07,3071327.74)	2.44(1.92, 3.07)	10165.42446 (7996.25257,12794.21587)	10119.66(7616.44,12945.64)	92514.66(13396.21,226344.82)	0.09 (0.01, 0.23)	385.3878975 (55.80452771,942.8835839)	383.47(56.06,942.07)	202692.83(158245.19,250780.88)	0.20(0.16, 0.25)	1198.311593 (935.5389813,1482.606154)	1188.89(797.91,1664.05)	1706357.74(1341523.65,2151470.59)	1.71(1.34, 2.15)	10087.91605 (7931.032029,12719.40473)	10182.83(7660.09,13019.30)	64758.23(9328.61,160633.54)	0.06(0.009, 0.16)	382.8479711 (55.15032781,949.6588342)	386.81(55.58,943.67)	0.04(0.00,0.08)	0.04(0.00,0.08)	0.05(0.03,0.08)	0.0196 (0.0116,0.0276)	2e-06	0.01655083(-0.00309052,0.03619604)	0.01941065(0.01052486,0.02829723)	0.04545475(0.01070988,0.0802117)	1.75% (0.26%,3.07%)	-0.76% (-1.50%,-0.01%)	-0.66% (-3.99%,2.56%)
Eastern Sub-Saharan Africa	Both	10-24	715547.38(552635.81,893751.35)	0.72(0.55, 0.89)	1153.485395 (890.8667004,1440.755926)	1138.17(727.24,1646.12)	5651750.73(4337168.57,7170939.94)	5.65(4.34, 7.17)	9110.803964 (6991.655234,11559.78583)	9348.79(6874.17,12241.26)	208895.28(28071.76,511431.84)	0.21 (0.03, 0.51)	336.7459087 (45.25257413,824.4445698)	346.32(48.52,836.83)	1677937.57(1290180.51,2102499.60)	1.68(1.29, 2.10)	1153.726468 (887.1101237,1445.649399)	1146.43(729.86,1656.18)	13481012.79(10341872.16,17136270.99)	13.48(10.34, 17.14)	9269.356355 (7110.927045,11782.66091)	9391.98(6890.52,12319.15)	502100.53(67668.53,1249878.42)	0.50(0.07, 1.25)	345.2373218 (46.52793852,859.3989671)	350.17(47.28,860.27)	0.05(-0.34,0.44)	0.05(-0.33,0.43)	0.08(-0.29,0.45)	0.0224 (0.012,0.0329)	2.5e-05	0.0540297(0.04395204,0.06410837)	0.05781914(0.05290773,0.06273079)	0.09599909(0.07911911,0.1128819)	0.02% (-1.53%,1.57%)	1.74% (0.12%,3.31%)	2.52% (-0.77%,5.27%)
	Female	10-24	435766.01(336424.92,545246.27)	0.44(0.34, 0.55)	1389.007139 (1072.356724,1737.976209)	1375.23(878.00,2000.14)	3457334.60(2652267.32,4375832.45)	3.46(2.65, 4.38)	11020.27769 (8454.120254,13947.99588)	11237.67(8286.38,14777.05)	127001.62(16836.25,311623.09)	0.13 (0.02, 0.31)	404.8185274 (53.66566071,993.300742)	413.45(56.74,1002.30)	1015155.89(776923.11,1272012.08)	1.02(0.78, 1.27)	1392.481936 (1065.699767,1744.809711)	1386.58(883.00,2005.34)	8166648.65(6232742.39,10414771.93)	8.17(6.23, 10.41)	11202.13247 (8549.407334,14285.8668)	11312.57(8269.88,14895.43)	302361.79(40452.62,751463.43)	0.30(0.04, 0.75)	414.7474659 (55.48857029,1030.776918)	419.13(56.87,1033.44)	0.05(0.04,0.06)	0.05(0.03,0.06)	0.08(0.07,0.10)	0.025 (0.0196,0.0304)	0	0.05611841(0.04407343,0.06816484)	0.06238769(0.05798618,0.0667894)	0.1061085(0.08440359,0.1278182)	0.25% (-1.53%,2.05%)	1.65% (-0.31%,3.79%)	2.45% (-1.90%,6.15%)
	Male	10-24	279781.37(215592.76,348899.54)	0.28(0.22, 0.35)	912.4985791 (703.1493453,1137.925426)	895.07(571.03,1290.60)	2194416.14(1675146.79,2818753.03)	2.19(1.68, 2.82)	7157.022603 (5463.441163,9193.278694)	7379.29(5420.20,9658.09)	81893.66(11211.64,199864.70)	0.08 (0.01, 0.20)	267.0937259 (36.56643011,651.8527525)	276.30(39.50,665.77)	662781.68(511510.03,828069.69)	0.66(0.51, 0.83)	913.756682 (705.2031144,1141.634169)	904.94(573.81,1301.42)	5314364.14(4063029.46,6791204.13)	5.31(4.06, 6.79)	7326.750085 (5601.573517,9362.823881)	7443.20(5481.13,9747.27)	199738.74(26319.39,492216.43)	0.20(0.03, 0.49)	275.3736471 (36.28573873,678.6036254)	280.17(37.30,682.60)	0.06(0.05,0.08)	0.06(0.04,0.07)	0.08(0.07,0.10)	0.0353 (0.0291,0.0415)	0	0.07344187(0.05807875,0.08880735)	0.07218178(0.0666373,0.07772656)	0.1005512(0.07367301,0.1274366)	0.14% (-2.03%,2.17%)	2.37% (0.33%,4.66%)	3.10% (-2.01%,7.55%)
High-income Asia Pacific	Both	10-24	650045.86(499785.24,820006.61)	0.65(0.50, 0.82)	1543.020694 (1186.345465,1946.458301)	1562.28(1021.14,2220.77)	5375248.50(4187003.90,6723524.18)	5.38(4.19, 6.72)	12759.28382 (9938.735131,15959.69994)	12459.34(9323.53,16055.14)	193764.15(20836.90,499470.63)	0.19 (0.02, 0.50)	459.9400089 (49.46077602,1185.59868)	448.50(47.17,1138.89)	399970.37(305714.36,501574.31)	0.40(0.31, 0.50)	1532.162825 (1171.097194,1921.376113)	1554.13(1026.89,2217.11)	3310645.22(2607749.04,4180403.18)	3.31(2.61, 4.18)	12682.05832 (9989.480382,16013.83216)	12301.61(9285.16,15905.70)	119475.80(13176.09,308644.97)	0.12(0.01, 0.31)	457.6748526 (50.4735089,1182.323443)	443.37(47.14,1115.98)	-0.02(-0.68,0.64)	-0.04(-0.63,0.56)	-0.03(-0.58,0.52)	-0.0142 (-0.0358,0.0073)	0.195428	-0.04220863(-0.09065502,0.006261256)	-0.07815236(-0.1216811,-0.03460465)	-0.06825711(-0.1104966,-0.02599975)	-0.70% (-5.37%,4.59%)	-0.61% (-5.22%,4.20%)	-0.49% (-6.02%,6.56%)
	Female	10-24	436314.96(332814.87,548689.17)	0.44(0.33, 0.55)	2126.479719 (1622.048605,2674.160858)	2149.93(1393.81,3052.55)	3521734.53(2737128.32,4365881.94)	3.52(2.74, 4.37)	17163.97038 (13340.01444,21278.11387)	16734.23(12507.46,21580.09)	124841.76(10934.15,319999.11)	0.12 (0.01, 0.32)	608.4445607 (53.2900421,1559.588112)	592.63(49.85,1492.12)	264325.56(202112.22,333351.04)	0.26(0.20, 0.33)	2083.160706 (1592.854827,2627.153414)	2109.44(1388.30,3016.22)	2127496.94(1677712.61,2660079.74)	2.13(1.68, 2.66)	16766.8918 (13222.12286,20964.19901)	16233.59(12201.22,21070.00)	75552.01(6851.14,195743.33)	0.08(0.007, 0.20)	595.4285257 (53.99410983,1542.661322)	576.01(50.57,1448.33)	-0.12(-0.15,-0.09)	-0.16(-0.18,-0.13)	-0.15(-0.17,-0.12)	-0.0542 (-0.07,-0.0383)	0	-0.115619(-0.1652191,-0.06599437)	-0.1768629(-0.2275372,-0.1261629)	-0.1634231(-0.2108653,-0.1159584)	-2.04% (-7.55%,5.02%)	-2.31% (-8.08%,4.19%)	-2.14% (-9.00%,6.28%)
	Male	10-24	213730.90(163155.21,271055.83)	0.21(0.16, 0.27)	989.0390798 (755.0002319,1254.310006)	1004.60(658.98,1444.33)	1853513.97(1456729.58,2360586.21)	1.85(1.46, 2.36)	8577.130033 (6741.011532,10923.60518)	8398.03(6246.84,11010.30)	68922.40(9628.51,172792.23)	0.07 (0.01, 0.17)	318.9381772 (44.55588899,799.5955171)	311.57(42.77,787.98)	135644.81(102910.77,171884.76)	0.14(0.10, 0.17)	1011.046834 (767.0592635,1281.166149)	1029.09(671.37,1482.95)	1183148.28(918563.61,1503785.36)	1.18(0.92, 1.50)	8818.754821 (6846.637396,11208.66638)	8584.14(6414.06,11183.17)	43923.79(6167.95,110392.08)	0.04(0.006, 0.11)	327.39188 (45.97368118,822.8221812)	317.97(42.88,798.74)	0.11(0.09,0.13)	0.12(0.09,0.14)	0.11(0.09,0.13)	0.0752 (0.0558,0.0945)	0	0.1176853(0.07512577,0.160263)	0.114751(0.08022844,0.1492855)	0.1096259(0.06619892,0.1530718)	2.23% (-3.33%,8.72%)	2.82% (-3.33%,9.74%)	2.65% (-5.17%,10.53%)
High-income North America	Both	10-24	1441498.43(1142774.51,1759841.05)	1.44(1.14, 1.76)	2356.421066 (1868.096342,2876.816545)	2395.69(1602.52,3326.44)	12012490.77(9459631.32,14871532.33)	12.01(9.46, 14.87)	19636.84856 (15463.68286,24310.53091)	19143.62(14494.62,24310.65)	435346.38(30985.72,1056269.82)	0.44 (0.03, 1.06)	711.6618047 (50.65243428,1726.686905)	693.67(49.08,1668.44)	1695678.02(1331713.32,2089187.21)	1.70(1.33, 2.09)	2378.92227 (1868.304269,2930.989209)	2404.68(1610.22,3341.64)	13640936.67(10715264.17,17014383.82)	13.64(10.72, 17.01)	19137.31715 (15032.7953,23870.03673)	18754.06(14285.77,24050.59)	488365.00(35465.34,1160357.53)	0.49(0.04, 1.16)	685.1432685 (49.75548451,1627.903617)	671.43(48.82,1620.81)	0.07(-0.69,0.84)	0.02(-0.69,0.74)	0.00(-0.70,0.71)	0.0141 (0.0059,0.0222)	0.000731	0.1326484(0.02796694,0.2374394)	0.1547007(0.09663788,0.2127973)	0.1352806(0.07855824,0.192035)	0.95% (-3.18%,6.15%)	-2.54% (-6.73%,2.63%)	-3.73% (-9.35%,1.91%)
	Female	10-24	993312.58(793872.07,1226322.23)	0.99(0.79, 1.23)	3322.71377 (2655.568566,4102.150578)	3375.99(2248.59,4686.60)	8149859.82(6422057.09,10011749.88)	8.15(6.42, 10.01)	27261.96375 (21482.31892,33490.14198)	26520.96(20175.94,33552.23)	294796.69(17758.35,724538.90)	0.29 (0.02, 0.72)	986.1196355 (59.4031584,2423.643317)	959.46(58.24,2316.75)	1163207.95(923817.13,1423579.64)	1.16(0.92, 1.42)	3337.004257 (2650.241254,4083.957055)	3372.79(2244.07,4694.03)	9271912.11(7336329.74,11529455.59)	9.27(7.34, 11.53)	26599.20796 (21046.42044,33075.63569)	26044.63(19711.23,33512.95)	330580.30(20308.48,806597.74)	0.33(0.02, 0.81)	948.3668633 (58.26083629,2313.962944)	928.79(57.10,2230.78)	0.06(-0.01,0.13)	0.07(-0.07,0.20)	0.03(-0.11,0.17)	-0.002 (-0.0134,0.0094)	0.73332	0.1108037(-0.006417621,0.2281624)	0.2075168(0.1331547,0.2819342)	0.1826337(0.1116172,0.2537005)	0.43% (-4.58%,6.92%)	-2.43% (-8.41%,3.65%)	-3.83% (-11.07%,4.01%)
	Male	10-24	448185.85(346333.58,553997.46)	0.45(0.35, 0.55)	1432.883659 (1107.254342,1771.171265)	1460.26(957.18,2045.77)	3862630.96(2974530.35,4885797.48)	3.86(2.97, 4.89)	12349.11982 (9509.795799,15620.25965)	12085.41(9031.71,15741.50)	140549.68(12659.51,344661.15)	0.14 (0.01, 0.34)	449.3478368 (40.47338542,1101.907449)	439.40(38.91,1077.28)	532470.07(409239.59,665952.30)	0.53(0.41, 0.67)	1461.97025 (1123.623924,1828.464195)	1478.47(975.41,2096.38)	4369024.57(3393954.37,5496970.58)	4.37(3.39, 5.50)	11995.76149 (9318.571345,15092.69333)	11774.76(8870.51,15296.60)	157784.70(14650.99,393467.13)	0.16(0.01, 0.39)	433.2197274 (40.22633248,1080.318447)	425.06(39.15,1039.14)	0.08(-0.01,0.18)	-0.03(-0.15,0.09)	-0.04(-0.16,0.08)	0.0477 (0.0035,0.0919)	0.034346	0.1753303(0.06425579,0.2865281)	0.039692(0.0004100924,0.07898934)	0.03116813(-0.01138883,0.07374319	2.03% (-4.21%,9.65%)	-2.86% (-10.47%,5.03%)	-3.59% (-11.05%,4.37%)
North Africa and Middle East	Both	10-24	2087219.94(1638836.46,2561749.04)	2.09(1.64, 2.56)	1916.532046 (1504.816303,2352.255287)	1885.86(1213.29,2698.51)	19518146.61(14949317.61,24834035.46)	19.52(14.95, 24.83)	17921.99893 (13726.79792,22803.16702)	18068.72(13297.57,23560.03)	758931.12(73251.91,1853894.09)	0.76 (0.07, 1.85)	696.8675374 (67.26154506,1702.287038)	703.22(70.54,1702.30)	3078834.33(2422470.80,3777982.72)	3.08(2.42, 3.78)	1897.03618 (1492.615148,2327.819282)	1890.65(1220.86,2713.00)	29847281.98(23325251.44,37879550.50)	29.85(23.33, 37.88)	18390.52311 (14371.9477,23339.63774)	18413.94(13729.29,23771.93)	1160507.38(113027.96,2836296.66)	1.16(0.11, 2.84)	715.0513009 (69.64263057,1747.595622)	716.07(71.55,1728.27)	0.01(-0.43,0.46)	0.08(-0.27,0.44)	0.09(-0.25,0.43)	0.0066 (0.0014,0.0118)	0.013165	-0.004274111(-0.04723709,0.03870734)	0.09466019(0.08139893,0.1079232)	0.09841678(0.08443213,0.1124034)	-1.02% (-3.03%,1.26%)	2.61% (0.42%,5.14%)	2.61% (-0.86%,6.12%)
	Female	10-24	1263725.49(983871.08,1564449.91)	1.26(0.98, 1.56)	2375.691711 (1849.590271,2941.026935)	2348.77(1478.82,3386.47)	11350130.00(8709215.95,14393975.05)	11.35(8.71, 14.39)	21337.23667 (16372.55274,27059.39511)	21541.05(15836.95,28128.66)	438881.05(43600.54,1068246.37)	0.44 (0.04, 1.07)	825.0574067 (81.96514453,2008.208339)	833.42(85.44,1999.77)	1860624.24(1465341.49,2290182.68)	1.86(1.47, 2.29)	2368.091043 (1864.998849,2914.807289)	2362.25(1493.78,3399.10)	17320788.03(13506227.34,21798621.92)	17.32(13.51, 21.80)	22044.86117 (17189.91689,27743.97985)	22073.09(16508.83,28482.85)	668608.71(65642.00,1618775.06)	0.67(0.07, 1.62)	850.9651107 (83.54520927,2060.279903)	852.14(86.95,2023.68)	0.03(0.02,0.04)	0.11(0.09,0.14)	0.11(0.09,0.13)	0.0173 (0.0116,0.023)	0	0.01944696(-0.02622548,0.06514027)	0.1271362(0.1107172,0.143558)	0.1272706(0.1102743,0.1442698)	-0.32% (-3.00%,2.27%)	3.32% (0.66%,6.43%)	3.14% (-1.00%,7.79%)
	Male	10-24	823494.45(644880.46,1017028.41)	0.82(0.64, 1.02)	1478.125504 (1157.523594,1825.507908)	1443.30(936.22,2052.30)	8168016.61(6240654.72,10557338.05)	8.17(6.24, 10.56)	14661.1233 (11201.61879,18949.81881)	14741.73(10834.52,19292.27)	320050.07(29842.89,784375.63)	0.32 (0.03, 0.78)	574.4716008 (53.56628034,1407.909449)	578.50(56.50,1410.29)	1218210.09(954542.37,1506907.66)	1.22(0.95, 1.51)	1454.988482 (1140.072778,1799.798993)	1447.94(944.30,2051.87)	12526493.95(9714631.58,16104495.26)	12.53(9.71, 16.10)	14961.21613 (11602.82384,19234.65857)	14976.37(11132.81,19510.33)	491898.67(47385.95,1212241.19)	0.49(0.05, 1.21)	587.5069497 (56.59616103,1447.859433)	588.25(56.57,1438.72)	0.00(-0.02,0.02)	0.06(0.03,0.08)	0.06(0.04,0.08)	0.0057 (-0.0091,0.0205)	0.449448	-0.01421529(-0.05434432,0.02592984)	0.06861043(0.05682182,0.08040043)	0.07704981(0.06227263,0.09182917)	-1.57% (-3.86%,1.06%)	2.05% (-0.94%,5.53%)	2.27% (-2.51%,7.25%)
Oceania	Both	10-24	39184.24(29691.10,50092.04)	0.04(0.03, 0.05)	1873.128962 (1419.327529,2394.555781)	1858.33(1160.52,2740.48)	320376.47(241898.51,413113.98)	0.32(0.24, 0.41)	15314.99558 (11563.50431,19748.13828)	15463.59(11180.08,20670.88)	11793.74(812.45,29143.84)	0.01 (0.00, 0.03)	563.7778028 (38.83782101,1393.166605)	569.34(38.06,1401.57)	75013.54(56801.86,96321.55)	0.08(0.06, 0.09)	1860.280614 (1408.64417,2388.703587)	1854.87(1158.71,2735.02)	620013.45(467465.21,798975.01)	0.62(0.47, 0.80)	15375.87699 (11592.79283,19813.99174)	15425.56(11153.48,20620.70)	22927.33(1554.98,57317.01)	0.02(0.002, 0.06)	568.5807881 (38.56247652,1421.419614)	570.48(37.99,1380.60)	-0.00(-0.34,0.34)	-0.00(-0.37,0.37)	0.02(-0.35,0.39)	-0.0061 (-0.0064,-0.0057)	0	-0.008347489(-0.05055911,0.03388196)	-0.009183755(-0.02349509,0.005129628)	0.01665751(-0.05786986,0.09124046)	-0.69% (-1.47%,0.17%)	0.40% (-0.01%,0.91%)	0.85% (-5.00%,6.88%)
	Female	10-24	22543.28(16959.05,29041.91)	0.02(0.17, 0.29)	2234.569026 (1681.039934,2878.73532)	2220.26(1355.71,3300.89)	187524.66(142009.28,240106.91)	0.19(0.14, 0.24)	18588.09931 (14076.45511,23800.23529)	18718.08(13416.63,25049.55)	6893.49(450.37,17349.23)	0.01 (0.00, 0.02)	683.3065911 (44.6425811,1719.716567)	688.08(42.02,1694.29)	42785.43(32254.65,55155.45)	0.04(0.03, 0.05)	2225.081739 (1677.42248,2868.392294)	2220.26(1355.71,3300.89)	359209.38(272480.54,459351.57)	0.36(0.27, 0.46)	18680.8997 (14170.51406,23888.85418)	18718.08(13416.63,25049.55)	13261.23(832.02,33094.86)	0.01(0.001, 0.03)	689.6584221 (43.26976699,1721.118153)	691.07(42.31,1685.36)	0.00(0.00,0.00)	0.00(0.00,0.00)	0.02(0.01,0.02)	0 (0,0)	0	-4.956036e-10(-0.05568054,0.05571156)	-2.459699e-10(-0.01873309,0.0187366)	0.0226707(-0.074934,0.1203707)	-0.42% (-1.16%,0.44%)	0.50% (0.14%,0.97%)	0.93% (-7.12%,9.43%)
	Male	10-24	16640.95(12467.56,21566.05)	0.02(0.12, 0.22)	1536.460221 (1151.130594,1991.194961)	1522.49(948.25,2256.66)	132851.80(99719.59,172599.77)	0.13(0.10, 0.17)	12266.21427 (9207.114964,15936.14653)	12419.25(8909.00,16746.68)	4900.26(363.17,12161.02)	0.00 (0.00, 0.01)	452.4409291 (33.53133931,1122.827604)	458.31(33.56,1118.11)	32228.12(24158.37,41739.93)	0.03(0.02, 0.04)	1527.755175 (1145.213622,1978.657218)	1522.49(948.25,2256.66)	260804.07(195829.26,339759.94)	0.26(0.19, 0.34)	12363.26531 (9283.17222,16106.12252)	12419.25(8909.00,16746.68)	9666.09(717.03,23918.93)	0.01(0.001, 0.02)	458.2154665 (33.99042799,1133.863112)	460.39(34.10,1119.71)	0.00(0.00,0.00)	0.00(-0.00,0.00)	0.03(0.02,0.03)	0 (0,0)	1	-6.159517e-11(-0.06473799,0.06477993)	-9.809931e-11(-0.02218392,0.02218884)	0.02976559(-0.0856397,0.1453042)	-0.57% (-1.48%,0.44%)	0.79% (0.28%,1.40%)	1.28% (-7.76%,11.42%)
South Asia	Both	10-24	6481046.60(5208078.63,7934629.44)	6.48(5.21, 7.93)	1937.70865 (1557.115636,2372.302044)	1917.31(1278.56,2687.79)	55926520.09(44417501.67,70293197.09)	55.93(44.42, 70.29)	16720.95702 (13279.98122,21016.31794)	16859.97(12758.60,21669.43)	2014066.56(138792.96,4930425.16)	2.01 (0.14, 4.93)	602.1672795 (41.49643416,1474.102573)	607.44(41.52,1465.54)	9965719.11(7974116.38,12238919.08)	9.97(7.97, 12.24)	1895.087927 (1516.363397,2327.361181)	1914.20(1281.15,2670.90)	88900819.43(70297083.35,110776714.10)	88.90(70.30, 110.78)	16905.44032 (13367.7412,21065.37533)	16771.78(12809.06,21468.37)	3220724.00(215334.14,7803031.37)	3.22(0.22, 7.80)	612.4550673 (40.9480868,1483.829754)	607.37(40.91,1474.12)	-0.03(-0.36,0.30)	-0.05(-0.45,0.35)	-0.03(-0.42,0.37)	-0.0046 (-0.0108,0.0015)	0.141817	-0.0157262(-0.06877944,0.03735521)	-0.05892702(-0.08606149,-0.03178519)	-0.03203104(-0.05686743,-0.007188487)	-2.20% (-6.04%,2.15%)	1.10% (-4.06%,5.45%)	1.71% (-4.30%,7.07%)
	Female	10-24	3713973.26(2995083.93,4591099.33)	3.71(3.00, 4.59)	2300.673891 (1855.347606,2844.022188)	2276.05(1513.99,3178.51)	33161916.71(26189494.50,41745686.13)	33.16(26.19, 41.75)	20542.62394 (16223.45721,25859.96277)	20680.00(15649.43,26484.97)	1189921.05(77723.38,2914924.62)	1.19 (0.08, 2.91)	737.1136253 (48.14685743,1805.691777)	742.25(50.05,1794.54)	5677100.41(4546572.83,6980615.30)	5.68(4.55, 6.98)	2231.286469 (1786.95209,2743.610532)	2260.99(1509.23,3149.39)	52430163.64(41478779.57,65323089.42)	52.43(41.48, 65.32)	20606.77217 (16302.51941,25674.11443)	20432.69(15614.99,26228.55)	1893087.11(125943.09,4555677.22)	1.89(0.13, 4.56)	489.1099516 (32.89613609,1180.845563)	737.52(48.99,1795.70)	-0.05(-0.07,-0.02)	-0.07(-0.09,-0.05)	-0.04(-0.07,-0.02)	-0.02 (-0.0254,-0.0146)	0	-0.0278114(-0.09132023,0.0357378)	-0.08805438(-0.1181777,-0.05792201)	-0.05660631(-0.08403921,-0.02916589)	-3.02% (-8.80%,2.27%)	0.31% (-5.74%,6.27%)	0.94% (-5.69%,8.37%)
	Male	10-24	2767073.35(2189545.06,3413756.04)	2.77(2.19, 3.41)	1599.096365 (1265.341794,1972.815389)	1583.66(1055.27,2231.17)	22764603.37(17942479.81,28879225.91)	22.76(17.94, 28.88)	13155.70277 (10368.98941,16689.35347)	13292.45(9986.43,17067.25)	824145.51(58230.16,1996596.48)	0.82 (0.06, 2.00)	476.2750857 (33.65130904,1153.836481)	481.55(32.77,1157.87)	4288618.70(3361396.54,5269657.39)	4.29(3.36, 5.27)	1579.954656 (1238.36006,1941.375606)	1591.24(1067.39,2222.86)	36470655.79(28551228.19,45491923.49)	36.47(28.55, 45.49)	13436.02368 (10518.45573,16759.51661)	13338.42(10140.01,17297.32)	1327636.89(89293.06,3205279.56)	1.33(0.09, 3.21)	489.1099516 (32.89613609,1180.845563)	485.33(32.27,1168.78)	-0.02(-0.07,0.02)	-0.03(-0.06,0.01)	-0.01(-0.04,0.02)	0.0145 (0.0104,0.0186)	0	-0.005885924(-0.0502883,0.03853618)	-0.02354065(-0.04781859,0.0007431894)	-0.003650243(-0.02656922,0.01927399)	-1.20% (-5.97%,4.57%)	2.13% (-4.16%,9.04%)	2.69% (-4.67%,10.75%)
Southeast Asia	Both	10-24	3215040.15(2532717.22,3945737.83)	3.22(2.53, 3.95)	2166.96247 (1707.07142,2659.458478)	2157.61(1407.83,3059.29)	26573504.54(20392311.44,33393554.29)	26.57(20.39, 33.39)	17910.75207 (13744.57907,22507.51949)	18009.39(13422.33,23259.38)	993994.43(58505.71,2453687.95)	0.99 (0.06, 2.45)	669.9601029 (39.43330901,1653.80507)	673.71(40.18,1655.44)	3616095.99(2822562.77,4454215.84)	3.62(2.82, 4.45)	2114.561484 (1650.532106,2604.663508)	2131.67(1390.46,3019.99)	30429115.24(23322816.46,38409516.78)	30.43(23.32, 38.41)	17793.84046 (13638.33525,22460.48918)	17616.06(13125.45,22740.66)	1142119.26(68944.19,2825526.03)	1.14(0.07, 2.83)	667.8698268 (40.31605773,1652.264912)	661.08(40.18,1623.92)	-0.02(-0.41,0.36)	-0.05(-0.46,0.36)	-0.03(-0.45,0.38)	-0.0386 (-0.0412,-0.0361)	0	-0.0340416(-0.03946624,-0.02861667)	-0.06550356(-0.06778584,-0.06322122)	-0.04521069(-0.05446869,-0.03595184)	-2.42% (-3.92%,-0.77%)	-0.65% (-1.88%,0.58%)	-0.31% (-2.42%,4.93%)
	Female	10-24	1947168.79(1540538.14,2393318.97)	1.95(1.54, 2.39)	2622.137612 (2074.552051,3222.941803)	2618.69(1713.29,3708.42)	16407549.37(12549044.26,20510305.77)	16.41(12.55, 20.51)	22095.0811 (16899.05934,27620.02167)	22128.65(16583.12,28483.71)	615254.18(33410.47,1541548.35)	0.62 (0.03, 1.54)	828.5265999 (44.99191638,2075.912432)	829.78(45.12,2051.10)	2136436.79(1688747.45,2643912.28)	2.14(1.69, 2.64)	2559.600349 (2023.237286,3167.5914)	2583.31(1694.92,3640.86)	18189954.17(13900725.04,22668757.96)	18.19(13.90, 22.67)	21792.83438 (16654.03858,27158.75385)	21561.36(16108.49,27696.09)	683692.94(37972.88,1698442.53)	0.68(0.04, 1.70)	523.666413 (35.30961863,1270.790481)	810.34(44.98,2012.37)	-0.04(-0.06,-0.03)	-0.09(-0.11,-0.06)	-0.07(-0.09,-0.05)	-0.0426 (-0.0526,-0.0325)	0	-0.03135711(-0.03806826,-0.02464552)	-0.07408147(-0.0771451,-0.07101775)	-0.05615647(-0.06802605,-0.04428549)	-2.38% (-3.91%,-0.64%)	-1.37% (-2.90%,0.34%)	-1.14% (-3.75%,4.65%)
	Male	10-24	1267871.36(986404.18,1590031.34)	1.27(0.99, 1.59)	1710.857088 (1331.047165,2145.577593)	1698.91(1097.19,2429.20)	10165955.17(7789730.93,12940175.10)	10.17(7.79, 12.94)	13717.87153 (10511.41052,17461.38525)	13849.54(10207.28,18141.22)	378740.25(25733.76,919463.04)	0.38 (0.03, 0.92)	511.0695439 (34.72495622,1240.717239)	516.12(34.89,1254.96)	1479659.20(1144529.08,1862399.67)	1.48(1.14, 1.86)	1690.234158 (1307.410617,2127.443622)	1702.00(1103.76,2419.14)	12239161.07(9480292.32,15442441.43)	12.24(9.48, 15.44)	13980.95459 (10829.46255,17640.10386)	13849.80(10262.00,18009.64)	458426.32(30910.63,1112471.20)	0.46(0.03, 1.11)	523.666413 (35.30961863,1270.790481)	518.60(34.83,1261.86)	0.01(0.00,0.01)	-0.00(-0.00,0.00)	0.02(0.02,0.03)	0.0059 (0.0053,0.0065)	0	0.008791144(0.0005856445,0.01699732)	0.0001934412(-0.002665297,0.003052261)	0.0248082(0.01000274,0.03961585)	-1.21% (-3.15%,0.86%)	1.92% (0.19%,3.55%)	2.46% (-0.76%,6.85%)
Southern Latin America	Both	10-24	211710.10(160780.02,273460.34)	0.21(0.16, 0.27)	1599.412508 (1214.649527,2065.918837)	1596.91(996.59,2350.53)	1676201.91(1270565.53,2126514.17)	1.68(1.27, 2.13)	12663.25175 (9598.778714,16065.239)	12696.11(9223.38,16779.97)	60974.13(5883.63,151658.41)	0.06 (0.01, 0.15)	460.6430855 (44.44922338,1145.738272)	461.85(46.33,1141.53)	247767.57(184386.86,322150.81)	0.25(0.18, 3.22)	1615.54518 (1202.277226,2100.554115)	1631.97(1020.54,2410.23)	2019673.23(1528199.56,2633399.96)	2.02(1.53, 2.63)	13169.08982 (9964.481813,17170.83736)	12935.44(9324.96,17278.04)	73167.48(7302.14,181537.51)	0.07(0.007, 0.18)	477.0816804 (47.61294156,1183.698326)	468.33(45.80,1158.78)	0.12(-0.49,0.73)	0.11(-0.46,0.68)	0.10(-0.45,0.64)	0.0699 (0.0625,0.0773)	0	0.1264578(0.1066009,0.1463187)	0.1035439(0.09431946,0.1127693)	0.1014866(0.06403285,0.1389544)	1.01% (-4.59%,6.49%)	3.99% (-0.84%,9.52%)	3.57% (-4.57%,13.08%)
	Female	10-24	139844.41(105915.29,181139.23)	0.14(0.11, 0.18)	2114.044749 (1601.134194,2738.303529)	2112.54(1314.09,3137.99)	1094241.22(838872.97,1399088.09)	1.09(0.84, 1.40)	16541.77591 (12681.34335,21150.18263)	16557.00(12034.03,22023.52)	39466.82(3390.80,97154.83)	0.04 (0.00, 0.10)	596.6246375 (51.25914598,1468.701234)	597.13(52.93,1473.61)	162130.39(120475.42,210598.53)	0.16(0.12, 2.11)	2146.1478 (1594.753731,2787.728855)	2168.17(1347.80,3200.25)	1303568.63(987100.35,1689879.26)	1.30(0.99, 1.69)	17255.56148 (13066.41657,22369.22156)	16922.88(12199.05,22713.14)	46809.56(4237.20,115106.53)	0.05(0.004, 0.12)	619.6261756 (56.08858818,1523.684851)	607.33(53.78,1483.99)	0.12(0.10,0.14)	0.11(0.09,0.13)	0.10(0.08,0.12)	0.0846 (0.0772,0.0919)	0	0.1391812(0.1147093,0.1636591)	0.1122127(0.101388,0.1230387)	0.1133623(0.06648883,0.1602578)	1.52% (-5.24%,9.22%)	4.32% (-1.69%,11.27%)	3.86% (-5.88%,15.71%)
	Male	10-24	71865.69(54055.69,92154.19)	0.07(0.54, 0.92)	1085.301631 (816.3385127,1391.694638)	1082.54(662.66,1586.59)	581960.68(436953.75,745584.85)	0.58(0.44, 0.75)	8788.656859 (6598.790362,11259.67707)	8822.69(6395.30,11722.70)	21507.32(2565.17,54092.73)	0.02 (0.00, 0.05)	324.799294 (38.73862896,816.8978803)	326.14(37.06,815.17)	85637.18(63689.84,111057.15)	0.09(0.06, 1.11)	1100.454291 (818.426781,1427.105914)	1112.13(691.25,1652.64)	716104.60(537540.14,937108.84)	0.72(0.54, 0.94)	9202.082798 (6907.494873,12042.03009)	9059.22(6512.58,12166.64)	26357.92(3101.56,65960.17)	0.03(0.003, 0.07)	338.7043565 (39.85570912,847.6009934)	333.21(37.04,830.03)	0.12(0.10,0.14)	0.11(0.10,0.12)	0.10(0.09,0.11)	0.0873 (0.0767,0.0979)	0	0.1308846(0.0968917,0.1648891)	0.1135421(0.1016085,0.1254772)	0.1048935(0.04256901,0.1672569)	1.40% (-4.76%,7.71%)	4.70% (-1.34%,11.92%)	4.28% (-7.99%,18.40%)
Southern Sub-Saharan Africa	Both	10-24	285792.89(224323.44,353277.21)	0.29(0.22, 0.35)	1672.903414 (1313.088841,2067.926338)	1663.63(1086.93,2358.98)	2365029.12(1841639.50,2961827.71)	2.37(1.84, 2.96)	13843.81981 (10780.13171,17337.2111)	13948.68(10427.62,17912.63)	86976.04(8884.26,207740.91)	0.09 (0.01, 0.21)	509.1187453 (52.00449651,1216.022147)	513.13(52.53,1226.07)	360743.71(282804.17,444549.29)	0.36(2.83, 4.45)	1653.685988 (1296.403186,2037.859337)	1651.84(1078.00,2349.22)	3017098.24(2340250.19,3787650.06)	3.02(2.34, 3.79)	13830.68638 (10727.94582,17362.97461)	13849.98(10345.95,17811.59)	110902.52(11244.55,264546.15)	0.11(0.01, 0.26)	508.3884534 (51.54617833,1212.706558)	509.13(52.47,1228.47)	-0.01(-0.35,0.33)	-0.01(-0.36,0.35)	0.00(-0.34,0.34)	-0.0229 (-0.0235,-0.0222)	0	-0.02511416(-0.04189458,-0.008330925)	-0.02230532(-0.02803821,-0.01657211)	-0.004973645(-0.0349346,0.02499629)	-1.15% (-1.90%,-0.30%)	-0.09% (-0.55%,0.44%)	-0.14% (-2.97%,3.02%)
	Female	10-24	172297.03(134480.65,214367.20)	0.17(0.13, 0.21)	1969.502569 (1537.228958,2450.400721)	1962.44(1290.35,2776.47)	1441851.40(1127072.09,1797185.57)	1.44(1.13, 1.80)	16481.59621 (12883.39923,20543.37012)	16562.77(12400.84,21456.37)	52723.63(5341.93,124653.26)	0.05 (0.01, 0.12)	602.676274 (61.0627798,1424.893507)	605.71(60.72,1449.72)	212573.40(165585.04,263879.98)	0.21(0.17, 2.64)	1959.901775 (1526.674668,2432.942432)	1958.61(1284.15,2779.15)	1793296.15(1400313.41,2239228.80)	1.79(1.40, 2.24)	16533.98011 (12910.72531,20645.42676)	16547.18(12355.51,21473.63)	65520.52(6910.50,156106.98)	0.07(0.007, 0.16)	604.0915377 (63.71401734,1439.288049)	604.59(60.91,1447.86)	-0.00(-0.01,-0.00)	-0.00(-0.00,-0.00)	0.01(0.00,0.02)	-0.0063 (-0.0068,-0.0058)	0	-0.004878597(-0.02656753,0.01681505)	-0.000441491(-0.007830827,0.006948391)	0.01955363(-0.019164,0.05828625)	-0.49% (-1.18%,0.29%)	0.32% (-0.19%,0.83%)	0.23% (-3.65%,4.49%)
	Male	10-24	113495.86(88713.57,142160.38)	0.11(0.89, 1.42)	1361.613555 (1064.299574,1705.502665)	1351.06(884.28,1911.27)	923177.72(713357.88,1173657.18)	0.92(0.71, 1.17)	11075.39302 (8558.177649,14080.40319)	11190.57(8326.23,14539.93)	34252.41(3430.16,82191.07)	0.03 (0.00, 0.08)	410.9272653 (41.15178791,986.0489021)	415.47(43.31,1007.58)	148170.31(115430.70,184250.72)	0.15(0.12, 1.84)	1350.883814 (1052.393421,1679.83262)	1348.77(880.23,1910.31)	1223802.09(944622.60,1558594.40)	1.22(0.94, 1.56)	11157.52826 (8612.220469,14209.86387)	11180.08(8312.76,14530.45)	45381.99(4669.37,108899.65)	0.05(0.005, 0.11)	413.7522418 (42.57110003,992.8492339)	414.64(42.91,1007.21)	-0.00(-0.01,-0.00)	-0.00(-0.00,0.00)	0.01(0.00,0.01)	-0.0054 (-0.0059,-0.0049)	0	-0.002608302(-0.0291177,0.02390813)	0.0004562935(-0.008636837,0.009550251)	0.01166862(-0.0356608,0.05902045)	-0.79% (-1.70%,0.28%)	0.74% (0.19%,1.39%)	0.69% (-4.13%,5.43%)
Tropical Latin America	Both	10-24	1092107.41(906655.16,1291631.59)	1.09(0.91, 1.29)	2281.900674 (1894.40801,2698.79588)	2244.59(1601.93,2973.39)	12665146.52(10264818.16,15429962.11)	12.67(10.26, 15.43)	26463.15375 (21447.79459,32240.08967)	26488.67(20766.63,32950.25)	466303.15(20478.40,1136066.84)	0.47 (0.02, 1.14)	974.3157769 (42.78852582,2373.751573)	975.13(43.31,2423.02)	1096565.14(914405.25,1292190.25)	1.10(0.91, 1.29)	2168.126859 (1807.960627,2554.916526)	2272.50(1656.36,3006.48)	13931632.92(11358981.06,17067515.64)	13.93(11.36, 17.07)	27545.60268 (22458.95947,33745.86506)	27542.29(21720.24,34494.30)	511405.85(22351.73,1264211.92)	0.51(0.02, 1.26)	1011.150832 (44.19380832,2499.597811)	1011.78(43.09,2501.51)	0.11(-0.32,0.54)	0.32(-0.19,0.83)	0.34(-0.16,0.84)	0.0394 (0.0092,0.0696)	0.01052	-0.05445417(-0.2851479,0.1767733)	0.2888735(0.2264176,0.3513683)	0.3134491(0.2451668,0.3817779)	-4.99% (-8.84%,-0.68%)	4.09% (-0.65%,9.54%)	3.78% (-2.47%,11.60%)
	Female	10-24	677328.95(570276.86,799573.62)	0.68(0.57, 0.80)	2819.508731 (2373.884348,3328.375122)	2785.24(1974.74,3669.95)	8136804.97(6648208.86,9824986.83)	8.14(6.65, 9.82)	33870.9763 (27674.41589,40898.34981)	33883.57(26767.09,42142.56)	298271.61(12976.22,727472.16)	0.30 (0.01, 0.73)	1241.611506 (54.01595043,3028.239252)	1241.90(53.67,3069.56)	664447.31(556714.58,792476.03)	0.66(0.56, 0.79)	2664.759799 (2232.69868,3178.217799)	2799.46(2027.21,3690.57)	8694410.89(7149490.08,10611823.23)	8.70(7.15, 10.61)	34868.85476 (28672.96411,42558.6193)	34899.25(27585.26,43536.71)	317424.10(14190.72,791310.98)	0.32(0.01, 0.79)	1273.026424 (56.91173544,3173.545377)	1275.45(54.78,3171.24)	0.05(0.03,0.07)	0.25(0.14,0.36)	0.26(0.16,0.37)	0.0147 (0.0091,0.0202)	0	-0.07231236(-0.2983336,0.1542212)	0.2398311(0.17987,0.299828)	0.2638024(0.1980493,0.3295987)	-5.49% (-9.90%,-0.83%)	2.95% (-3.64%,11.18%)	2.53% (-5.92%,14.27%)
	Male	10-24	414778.47(339660.82,502540.95)	0.41(0.34, 0.50)	1740.090083 (1424.954453,2108.273684)	1704.54(1217.20,2305.19)	4528341.55(3596715.88,5666873.36)	4.53(3.60, 5.67)	18997.42354 (15089.04179,23773.82364)	19035.33(14646.96,24320.09)	168031.54(7406.81,416401.98)	0.17 (0.01, 0.42)	704.9305715 (31.0732628,1746.901101)	706.32(32.03,1769.41)	432117.83(355030.65,509761.79)	0.43(0.36, 0.51)	1685.194897 (1384.566413,1987.994739)	1763.08(1268.83,2361.08)	5237222.04(4149466.63,6563520.08)	5.24(4.15, 6.56)	20424.38256 (16182.29919,25596.74653)	20398.60(15833.24,25945.64)	193981.75(8374.87,482238.03)	0.19(0.008, 0.48)	756.499795 (32.66073629,1880.656182)	755.81(31.59,1868.19)	0.19(0.13,0.25)	0.41(0.26,0.57)	0.43(0.28,0.59)	0.101 (0.0496,0.1525)	0.000118	0.00192958(-0.2401122,0.2445586)	0.4119131(0.3475362,0.4763314)	0.4352194(0.3644058,0.5060829)	-3.15% (-8.71%,3.24%)	7.51% (0.23%,15.95%)	7.32% (-1.64%,17.51%)
Western Europe	Both	10-24	1997264.61(1539479.92,2524022.11)	1.997(1.54, 2.52)	2429.746918 (1872.834769,3070.567068)	2492.91(1608.98,3550.41)	18057538.87(14018058.94,22453595.58)	18.06(14.02, 22.45)	21967.6698 (17053.49174,27315.63681)	21285.85(15800.48,27578.34)	654104.47(42665.20,1616295.84)	0.65 (0.04, 1.62)	795.7424957 (51.90380235,1966.284193)	770.69(49.19,1880.99)	1778114.56(1369106.71,2229828.92)	1.78(1.37, 2.23)	2467.02001 (1899.547838,3093.744744)	2496.32(1609.35,3560.81)	15555526.91(12045489.46,19403500.30)	15.56(12.05, 19.40)	21582.29684 (16712.34478,26921.11334)	21262.28(15883.24,27426.76)	561663.64(36413.71,1389697.89)	0.56(0.04, 1.39)	779.2723065 (50.52169212,1928.116767)	767.59(49.70,1869.48)	0.02(-0.65,0.70)	0.02(-0.61,0.65)	0.02(-0.62,0.67)	-0.001 (-0.0182,0.0163)	0.913634	0.001318007(-0.01422442,0.01686285)	0.0132948(-0.0001255171,0.02671692)	0.01576788(0.002923623,0.02861378)	1.53% (-0.73%,3.92%)	-1.75% (-3.56%,0.42%)	-2.07% (-5.37%,1.37%)
	Female	10-24	1335338.75(1033452.60,1690156.66)	1.34(1.03, 1.69)	3320.501439 (2569.820466,4202.804431)	3400.01(2179.43,4865.42)	11900564.77(9314400.86,14681554.69)	11.90(9.31, 14.68)	29592.37307 (23161.52471,36507.68278)	28559.24(21353.73,36866.46)	433081.99(28951.34,1076773.96)	0.43 (0.03, 1.08)	1076.917288 (71.99143772,2677.544923)	1038.40(67.12,2513.56)	1180357.95(912792.62,1476856.70)	1.18(0.91, 1.48)	3375.082056 (2610.013323,4222.882152)	3409.95(2188.14,4873.06)	10163572.71(7893841.33,12624239.15)	10.16(7.89, 12.62)	29061.43158 (22571.42602,36097.39141)	28601.14(21412.49,36700.30)	368059.04(24369.85,906759.67)	0.37(0.02, 0.91)	1052.417584 (69.68245369,2592.762896)	1035.39(66.73,2523.70)	0.01(-0.01,0.04)	0.01(-0.01,0.04)	0.01(-0.01,0.04)	0.0054 (-0.0158,0.0266)	0.615929	-0.002861795(-0.02283149,0.01711189)	0.01221181(-0.001568207,0.02599372)	0.01458357(-0.001359256,0.03052894)	1.64% (-0.91%,4.45%)	-1.79% (-4.06%,0.64%)	-2.27% (-6.16%,1.33%)
	Male	10-24	661925.86(512985.77,827626.44)	0.66(0.51, 0.83)	1576.556454 (1221.815134,1971.217462)	1625.76(1051.06,2317.91)	6156974.10(4730592.34,7825358.74)	6.16(4.73, 7.83)	14664.50829 (11267.19222,18638.22006)	14310.92(10517.14,18818.71)	221022.48(14499.23,547622.84)	0.22 (0.01, 0.55)	526.4251404 (34.53386749,1304.312731)	513.95(32.48,1302.02)	597756.60(463521.69,745126.35)	0.60(0.46, 0.75)	1611.087316 (1249.294302,2008.28163)	1634.40(1059.96,2339.14)	5391954.20(4109765.21,6817883.66)	5.39(4.11, 6.82)	14532.51872 (11076.73353,18375.71654)	14353.72(10544.31,18873.68)	193604.60(12356.15,476779.85)	0.19(0.01, 0.48)	521.8075507 (33.3025751,1285.027985)	515.51(33.24,1292.12)	0.04(0.02,0.06)	0.03(0.02,0.05)	0.04(0.02,0.05)	0.0111 (-0.0084,0.0306)	0.265371	0.03599423(0.0203847,0.05160621)	0.03850965(0.0277837,0.04923676)	0.04200289(0.02026275,0.06374776)	2.19% (-0.45%,4.89%)	-0.90% (-4.08%,2.29%)	-0.88% (-5.72%,4.70%)
Western Sub-Saharan Africa	Both	10-24	1176262.51(924723.31,1455172.53)	1.18(0.92, 1.46)	1965.556319 (1545.229681,2431.620102)	1927.38(1269.06,2706.56)	10165641.05(7878825.92,12831723.98)	10.17(7.88, 12.83)	16986.97348 (13165.66327,21442.04718)	17252.44(12863.57,22410.59)	369941.07(30247.88,905423.46)	0.37 (0.03, 0.91)	618.1783471 (50.54476775,1512.979277)	628.40(51.99,1536.68)	3153449.12(2478121.13,3942378.04)	3.15(2.48, 3.94)	1954.226986 (1535.718829,2443.134882)	1918.89(1260.78,2710.03)	27039348.67(20875134.44,33675586.78)	27.04(20.88, 33.68)	16756.58076 (12936.54963,20869.13026)	17020.94(12666.64,22095.62)	992700.53(78429.34,2444639.26)	0.99(0.08, 2.44)	615.187397 (48.60352452,1514.969748)	625.43(51.10,1537.58)	-0.01(-0.33,0.31)	-0.04(-0.39,0.30)	-0.01(-0.34,0.33)	-0.0157 (-0.0228,-0.0085)	1.6e-05	-0.01070329(-0.02407048,0.002665693)	-0.05510165(-0.06236204,-0.04784073)	-0.01558158(-0.02796394,-0.003197691)	-0.58% (-2.97%,1.66%)	-1.36% (-4.20%,1.97%)	-0.48% (-4.05%,3.79%)
	Female	10-24	711131.11(561145.89,876053.48)	0.71(0.56, 0.88)	2286.189328 (1804.00735,2816.392223)	2248.89(1479.79,3162.85)	6241676.70(4835716.83,7939264.16)	6.24(4.84, 7.94)	20066.13756 (15546.16875,25523.64927)	20312.55(15251.82,26283.54)	226232.34(18070.08,553298.95)	0.23 (0.02, 0.55)	727.3060686 (58.09283268,1778.7805)	736.68(59.43,1801.15)	1887367.29(1492962.76,2382401.40)	1.89(1.49, 2.38)	2282.1006 (1805.208356,2880.668581)	2248.88(1475.18,3201.30)	16419508.22(12703914.92,20658450.54)	16.42(12.70, 20.66)	19853.56518 (15360.87437,24979.06082)	20093.36(15027.78,26168.85)	599602.39(49197.02,1490282.55)	0.60(0.05, 1.49)	725.0061873 (59.48632485,1801.967591)	734.17(59.89,1804.28)	-0.00(-0.01,0.00)	-0.03(-0.05,-0.02)	-0.00(-0.01,0.01)	3e-04 (-0.0021,0.0027)	0.786553	0.004008313(-0.007290781,0.01530868)	-0.04744578(-0.0534012,-0.04149001)	-0.01297586(-0.02888264,0.002933453)	-0.18% (-3.64%,3.05%)	-1.06% (-5.14%,2.57%)	-0.32% (-4.96%,4.75%)
	Male	10-24	465131.40(361353.04,579402.29)	0.47(0.36, 0.58)	1618.511313 (1257.395176,2016.138169)	1581.25(1032.17,2237.28)	3923964.35(3039734.39,4985377.63)	3.92(3.04, 4.99)	13654.16468 (10577.32186,17347.54983)	13915.12(10353.46,18252.58)	143708.73(12126.43,353168.84)	0.14 (0.01, 0.35)	500.0612799 (42.19618146,1228.91675)	510.33(41.80,1250.91)	1266081.83(985216.86,1589078.95)	1.27(0.99, 1.59)	1609.511747 (1252.460997,2020.12317)	1573.70(1024.86,2229.15)	10619840.45(8160299.29,13392353.34)	10.62(8.16, 13.39)	13500.51599 (10373.81413,17025.08443)	13762.40(10244.32,18039.53)	393098.14(31896.68,958425.12)	0.39(0.03, 0.96)	499.7276318 (40.54878048,1218.401887)	510.11(41.30,1248.96)	-0.02(-0.03,-0.01)	-0.04(-0.05,-0.03)	-0.00(-0.01,0.01)	-0.0156 (-0.017,-0.0142)	0	-0.02118033(-0.03784769,-0.004510199)	-0.05364671(-0.06547296,-0.04181906)	-0.006874618(-0.02660612,0.01286078)	-0.56% (-3.73%,2.76%)	-1.13% (-5.37%,3.33%)	-0.07% (-4.86%,5.16%)
