# Supplementary material for: Rising global burden of migraine among adolescents and young adults: a 30-year analysis (1990–2021)
Source: Front Neurol. 2025 Sep 1;16:1652468. doi: 10.3389/fneur.2025.1652468 (PMC12434965; doi:10.3389/fneur.2025.1652468)
Supplement: Supplementary file 8 [file Table_4.xls]

## Sheet: Additional table 2
Additional table 4: Migraine incidence counts and ASIR of 204 countries and territories in 1990, and 2021.
countries and territories_name	1990						2021						Percentage Change
	Incidence		Prevalence		DALYs		Incidence		Prevalence		DALYs
	Counts	ASIR	Counts	ASPR	Counts	ASDR	Counts	ASIR	Counts	ASPR	Counts	ASDR	ASIR	ASPR	ASDR
Afghanistan	64829(49827,81418)	1895.08(1192.38,2752.22)	609251(462299,790709)	18239.29(13255.52,24224.83)	23245(2186,56437)	695.90(69.78,1708.38)	201342(156062,251036)	1867.31(1176.84,2709.65)	1905805(1445779,2466848)	18004.09(13091.04,23909.98)	73626(7301,179672)	695.86(70.79,1719.07)	-0.0147	-0.0129	-0.0001
Albania	16562(12469,21417)	1698.41(1048.38,2503.53)	143384(107521,181514)	14567.81(10488.54,19205.44)	5281(604,13271)	536.33(59.23,1342.66)	8597(6501,11238)	1679.21(1036.96,2475.22)	78772(59286,99992)	14390.26(10360.52,18988.05)	2905(334,7259)	529.53(58.40,1314.55)	-0.0113	-0.0122	-0.0127
Algeria	161819(125714,201325)	1873.10(1180.19,2718.11)	1526239(1158977,1974104)	18050.17(13125.05,23966.21)	59496(5915,147931)	704.22(70.07,1732.78)	193983(151324,240182)	1870.54(1178.91,2714.07)	1817769(1383438,2348570)	18026.43(13106.62,23937.00)	70961(6912,174208)	704.42(69.56,1732.77)	-0.0014	-0.0013	0.0003
American Samoa	279(211,361)	1860.37(1161.51,2743.82)	2339(1763,3008)	15505.21(11207.29,20725.15)	87(6,217)	574.44(39.21,1402.98)	264(200,340)	1860.66(1161.73,2744.19)	2107(1592,2727)	15485.25(11194.57,20700.55)	78(5,197)	573.86(39.04,1410.10)	0.0002	-0.0013	-0.001
Andorra	286(216,364)	2417.86(1495.86,3512.24)	2587(1973,3264)	20647.43(15016.85,27163.83)	94(6,237)	747.93(47.29,1846.25)	312(235,393)	2426.78(1501.37,3525.05)	2749(2101,3477)	20739.30(15088.29,27289.48)	99(6,243)	749.16(46.94,1815.01)	0.0037	0.0044	0.0016
Angola	52131(39710,66761)	1600.84(984.73,2352.11)	430409(322534,559081)	13671.57(9831.69,18131.41)	15732(1457,36985)	500.11(46.18,1194.28)	174124(132239,222297)	1608.86(989.65,2365.04)	1412569(1060714,1835253)	13754.19(9898.09,18240.23)	51875(4969,126287)	505.68(49.03,1212.52)	0.005	0.006	0.0111
Antigua and Barbuda	312(247,387)	1823.60(1173.22,2610.52)	3260(2476,4170)	18695.27(13570.98,24730.22)	121(8,297)	691.41(43.12,1682.65)	342(268,425)	1814.96(1167.86,2597.47)	3692(2817,4716)	18575.62(13485.96,24569.52)	136(9,329)	684.65(42.85,1656.62)	-0.0047	-0.0064	-0.0098
Argentina	139225(106326,179286)	1586.88(989.38,2344.11)	1085977(825876,1381318)	12615.34(9137.84,16709.33)	39529(3743,97687)	459.41(44.90,1131.73)	172696(128725,224969)	1629.70(1007.23,2419.70)	1400061(1064218,1844610)	12883.76(9294.36,17324.34)	50798(4927,125195)	467.16(45.42,1150.43)	0.027	0.0213	0.0169
Armenia	15059(11493,19212)	1734.34(1071.72,2563.53)	128519(96467,167280)	14698.78(10596.82,19481.21)	4685(439,11506)	535.78(51.82,1326.71)	9271(7116,11776)	1714.46(1059.30,2535.06)	78037(58632,101574)	14530.39(10469.07,19262.46)	2856(269,7052)	531.96(52.19,1313.53)	-0.0115	-0.0115	-0.0071
Australia	73443(54137,94662)	1872.63(1157.15,2732.20)	606960(456348,779183)	14952.10(10657.94,19886.98)	21644(1844,54452)	533.01(44.87,1332.96)	87670(65237,111629)	1869.05(1154.88,2726.92)	713542(539124,916113)	14921.02(10635.56,19844.36)	25510(2197,63507)	533.58(43.13,1323.39)	-0.0019	-0.0021	0.0011
Austria	36713(27483,47367)	2339.58(1467.74,3361.06)	334903(255589,424480)	19593.83(14300.79,25909.72)	12113(873,30015)	707.81(48.40,1749.92)	32175(24314,41001)	2328.35(1460.77,3345.00)	283463(216560,359481)	19473.34(14206.90,25763.46)	10208(741,24859)	700.88(48.77,1721.17)	-0.0048	-0.0061	-0.0098
Azerbaijan	36394(27623,46764)	1736.02(1072.77,2566.25)	314829(236110,410179)	14720.78(10611.09,19507.51)	11497(1103,28613)	537.35(52.26,1330.65)	37832(29093,48054)	1714.17(1059.06,2534.80)	320879(241114,418268)	14532.94(10470.31,19265.64)	11724(1080,29222)	531.10(49.26,1319.47)	-0.0126	-0.0128	-0.0116
Bahamas	1442(1137,1792)	1821.63(1171.93,2607.76)	15158(11511,19395)	18671.70(13553.94,24701.03)	560(37,1354)	689.58(43.97,1673.48)	1787(1409,2228)	1825.88(1175.20,2613.71)	18612(14117,23832)	18710.42(13581.36,24757.59)	686(44,1654)	689.40(43.44,1681.01)	0.0023	0.0021	-0.0003
Bahrain	2397(1869,2995)	1864.11(1175.48,2701.98)	23292(17746,29954)	17959.38(13042.75,23841.46)	909(92,2253)	701.02(69.44,1700.55)	5831(4503,7403)	1818.91(1152.81,2633.62)	59911(45557,77161)	17570.67(12779.25,23351.79)	2347(243,5796)	686.73(67.95,1692.45)	-0.0242	-0.0216	-0.0204
Bangladesh	662643(511397,838566)	1869.41(1171.48,2768.93)	5843249(4383171,7548544)	16911.47(12165.89,22515.30)	211336(13508,516000)	611.92(38.18,1489.44)	851904(653244,1091325)	1872.64(1173.24,2774.08)	7798719(5845563,10045645)	16957.85(12202.35,22564.56)	283551(18317,693192)	616.46(40.77,1512.54)	0.0017	0.0027	0.0074
Barbados	1190(937,1480)	1817.33(1169.02,2601.46)	12661(9627,16195)	18620.01(13517.30,24629.15)	468(31,1134)	687.94(42.99,1673.44)	998(783,1243)	1813.35(1166.17,2596.13)	10700(8143,13680)	18576.82(13486.71,24568.01)	395(27,962)	685.59(44.96,1661.86)	-0.0022	-0.0023	-0.0034
Belarus	34754(26138,44717)	1577.95(975.00,2328.59)	302071(228336,384022)	13552.21(9834.04,17939.64)	11536(1656,27625)	517.19(71.95,1231.37)	22389(16989,28818)	1566.56(968.49,2310.76)	190043(143925,242120)	13435.48(9743.59,17789.20)	7229(990,17341)	511.36(68.52,1228.90)	-0.0072	-0.0086	-0.0113
Belgium	51767(39421,68211)	2644.89(1631.38,3844.39)	494061(380796,619715)	23877.07(17317.01,31340.35)	17975(1024,45408)	868.55(47.25,2123.96)	53656(41312,68499)	2758.02(1704.41,4043.35)	497605(381540,631394)	25068.37(18636.84,33045.05)	18020(928,44438)	907.91(46.91,2233.78)	0.0428	0.0499	0.0453
Belize	1172(923,1464)	1821.68(1172.03,2607.84)	11593(8800,14909)	18670.89(13553.27,24701.14)	428(27,1047)	689.21(43.74,1687.68)	2357(1853,2944)	1824.23(1173.67,2611.57)	24829(18842,31792)	18703.47(13576.53,24744.25)	913(64,2195)	687.53(44.18,1675.82)	0.0014	0.0017	-0.0024
Benin	27786(21313,35111)	1865.79(1153.46,2708.24)	238027(180548,308834)	16921.93(12239.44,22463.97)	8652(680,21198)	615.95(52.07,1527.04)	83078(63427,104218)	1864.51(1154.75,2704.53)	728395(553245,943506)	16856.82(12190.48,22382.23)	26776(2100,66899)	620.14(49.46,1510.24)	-0.0007	-0.0038	0.0068
Bermuda	214(168,267)	1818.16(1169.93,2602.21)	2346(1799,2990)	18617.01(13515.37,24625.66)	87(6,210)	689.32(44.64,1671.98)	164(130,204)	1819.43(1170.18,2604.58)	1717(1303,2196)	18652.10(13540.39,24668.87)	64(4,155)	691.46(44.06,1690.79)	0.0007	0.0019	0.0031
Bhutan	4194(3216,5337)	1843.65(1157.75,2730.39)	37684(28220,48674)	16571.15(11906.74,22096.82)	1368(87,3395)	601.46(36.43,1495.59)	3720(2856,4787)	1863.47(1169.54,2758.21)	34874(26095,44832)	16787.63(12068.64,22370.81)	1274(84,3139)	612.94(38.54,1502.53)	0.0108	0.0131	0.0191
Bolivia (Plurinational State of)	28285(22036,35196)	1369.57(881.21,1981.00)	277674(210786,360183)	13945.16(10173.49,18338.36)	10166(837,24253)	511.09(42.75,1240.09)	43585(33970,54079)	1363.91(878.02,1972.87)	449457(342330,579560)	13863.13(10114.17,18235.25)	16461(1459,39830)	507.54(43.32,1251.08)	-0.0041	-0.0059	-0.0069
Bosnia and Herzegovina	19135(14342,24699)	1689.27(1043.59,2489.07)	168991(126720,214444)	14462.24(10413.23,19080.54)	6221(721,15516)	531.77(60.01,1334.12)	9002(6759,11582)	1692.56(1045.20,2494.56)	80175(60170,101941)	14505.44(10444.18,19132.04)	2948(346,7384)	532.84(59.08,1319.19)	0.0019	0.003	0.002
Botswana	7418(5639,9495)	1614.37(992.97,2373.95)	60975(45756,79173)	13814.52(9942.98,18323.21)	2238(210,5433)	507.69(47.77,1221.61)	10430(7903,13451)	1600.59(984.39,2351.97)	89734(67524,116439)	13678.10(9837.28,18139.92)	3309(328,7885)	504.21(48.14,1215.69)	-0.0085	-0.0099	-0.0069
Brazil	1064329(883297,1258615)	2246.83(1605.60,2975.21)	12339086(10013592,15028092)	26489.23(20769.43,32957.72)	454228(20024,1107906)	975.01(43.50,2424.29)	1054668(879428,1241765)	2277.64(1661.25,3008.91)	13408268(10956120,16402416)	27592.69(21777.63,34545.14)	492088(21532,1216905)	1013.43(43.14,2506.39)	0.0137	0.0417	0.0394
Brunei Darussalam	1131(846,1465)	1493.14(927.53,2209.51)	9112(6807,11848)	11817.78(8524.82,15900.71)	330(33,834)	427.52(42.94,1073.29)	1536(1149,2002)	1476.19(917.80,2183.43)	12843(9599,16718)	11689.08(8427.16,15718.83)	466(51,1192)	423.42(43.88,1061.50)	-0.0114	-0.0109	-0.0096
Bulgaria	31067(23362,40202)	1694.20(1046.19,2496.95)	268974(201713,340609)	14520.05(10454.72,19150.35)	9904(1088,24877)	534.42(57.10,1335.93)	16408(12394,21174)	1690.39(1044.01,2491.21)	140610(105594,178119)	14482.19(10427.60,19103.48)	5161(587,12727)	531.54(60.13,1316.68)	-0.0022	-0.0026	-0.0054
Burkina Faso	56886(43608,72459)	1865.79(1154.55,2707.12)	479741(363778,621580)	16893.01(12217.89,22426.90)	17461(1381,42966)	616.05(50.96,1519.25)	138904(106092,174845)	1871.74(1158.70,2716.18)	1211170(918021,1568539)	16939.09(12250.91,22486.91)	44633(3546,108872)	624.76(49.89,1523.40)	0.0032	0.0027	0.0141
Burundi	19673(14985,25252)	1156.27(705.59,1721.12)	157248(118629,201771)	9586.03(6882.71,12695.69)	5842(799,14204)	356.96(49.39,862.33)	50660(38511,65132)	1157.17(706.35,1722.14)	404517(304870,519007)	9589.05(6884.37,12701.08)	15139(2056,37351)	359.69(48.21,877.06)	0.0008	0.0003	0.0076
Cabo Verde	2159(1650,2705)	1861.28(1153.34,2698.66)	18969(14416,24561)	16809.64(12156.20,22324.23)	701(56,1737)	621.42(49.87,1539.35)	2752(2086,3448)	1856.07(1150.74,2690.19)	25335(19345,32562)	16745.57(12108.98,22245.19)	938(73,2322)	619.41(49.09,1531.64)	-0.0028	-0.0038	-0.0032
Cambodia	68166(52011,87134)	2088.91(1277.47,3044.47)	552279(414053,708133)	17571.65(12549.66,23301.61)	20450(1151,50799)	650.69(38.47,1592.92)	95653(72520,122301)	2068.21(1264.45,3014.25)	805053(602346,1029118)	17362.15(12403.30,23016.09)	30101(1757,74789)	649.19(39.20,1595.33)	-0.0099	-0.0119	-0.0023
Cameroon	61461(46982,77297)	1865.31(1154.27,2706.52)	535207(405837,693902)	16888.76(12214.52,22422.14)	19544(1542,48458)	617.28(50.50,1506.36)	196546(149990,246870)	1858.99(1151.64,2695.39)	1720665(1305972,2229771)	16795.52(12146.03,22306.65)	63427(5033,156229)	619.58(49.51,1523.29)	-0.0034	-0.0055	0.0037
Canada	132122(102590,169776)	2298.51(1459.32,3346.38)	1107468(857264,1388793)	18582.29(13714.70,24301.28)	40233(2727,101524)	674.98(46.36,1668.51)	145452(110751,186948)	2275.03(1420.29,3308.04)	1198128(901544,1529652)	18223.21(13206.55,24001.16)	43345(2949,106566)	659.28(44.73,1578.62)	-0.0102	-0.0193	-0.0233
Central African Republic	13650(10449,17508)	1604.59(986.60,2358.80)	114353(85861,148433)	13731.44(9879.18,18210.06)	4144(403,9792)	497.95(49.07,1187.08)	29452(22442,37853)	1606.23(987.77,2361.05)	246248(184820,319700)	13740.90(9885.80,18222.50)	9018(855,21581)	503.42(48.79,1204.54)	0.001	0.0007	0.011
Chad	35053(26826,44307)	1868.35(1157.24,2710.50)	301976(228819,391251)	16890.95(12215.16,22426.34)	11015(844,27090)	616.67(49.67,1503.38)	112020(85746,142058)	1863.94(1154.64,2703.29)	960283(727578,1243767)	16844.25(12181.34,22366.21)	35267(2779,87169)	619.18(49.22,1505.18)	-0.0024	-0.0028	0.0041
Chile	59941(44785,77792)	1612.30(1005.82,2373.88)	490924(371945,625698)	12817.85(9189.91,17046.71)	17829(1806,44720)	465.16(46.16,1155.11)	63486(47494,81744)	1638.74(1025.08,2394.93)	524144(392350,669570)	13076.11(9444.67,17336.53)	18908(1920,47292)	471.43(46.24,1177.36)	0.0164	0.0201	0.0135
China	4979296(3881382,6165953)	1408.11(934.90,1981.18)	41714247(32919972,52307681)	11095.87(8424.35,14379.86)	1555381(151551,3728640)	412.94(39.18,1001.78)	3497950(2734784,4274705)	1491.27(993.66,2096.03)	27637742(21454997,35051646)	11851.82(8894.59,15301.11)	1030223(92181,2496311)	441.91(38.95,1058.07)	0.0591	0.0681	0.0702
Colombia	178702(141570,218656)	1752.19(1140.64,2504.40)	1854412(1447596,2364166)	18097.20(13491.41,23755.63)	68879(4758,167710)	672.15(42.87,1648.26)	199768(157448,255714)	1749.54(1135.23,2523.42)	2193821(1678314,2807945)	18165.76(13404.98,24130.60)	81546(5776,200531)	674.87(44.64,1658.40)	-0.0015	0.0038	0.004
Comoros	1796(1362,2310)	1151.17(702.63,1713.86)	14385(10835,18461)	9542.14(6848.66,12637.25)	538(75,1329)	357.86(49.72,883.36)	2529(1902,3233)	1149.01(701.47,1710.67)	20995(15817,27010)	9521.66(6832.48,12610.72)	790(106,1913)	358.17(48.09,858.09)	-0.0019	-0.0021	0.0009
Congo	13244(10074,17012)	1605.66(987.72,2359.92)	110237(82646,143147)	13719.14(9870.96,18194.14)	4039(389,9570)	502.90(47.95,1207.44)	27061(20621,34762)	1604.93(987.10,2358.95)	225830(169424,293220)	13720.15(9871.89,18195.37)	8310(795,20102)	505.26(48.07,1218.58)	-0.0005	0.0001	0.0047
Cook Islands	110(83,142)	1860.81(1161.83,2744.39)	909(684,1170)	15480.21(11191.47,20694.33)	34(2,85)	576.84(38.13,1428.97)	76(57,99)	1879.09(1171.58,2773.40)	644(485,827)	15689.59(11335.92,20973.20)	24(2,59)	582.58(37.87,1427.11)	0.0098	0.0135	0.01
Costa Rica	16048(12610,19771)	1728.60(1114.09,2505.40)	163444(123611,214473)	17775.49(13033.33,23794.04)	6076(422,14926)	660.95(43.24,1627.15)	18436(14426,22818)	1731.09(1115.68,2508.73)	195734(147914,255867)	17799.09(13050.83,23825.37)	7280(518,17847)	661.81(42.94,1628.58)	0.0014	0.0013	0.0013
Croatia	17345(13047,22354)	1694.93(1046.69,2497.98)	151744(113869,192315)	14525.50(10458.61,19156.97)	5597(624,13830)	535.43(57.75,1332.94)	10996(8366,13934)	1683.24(1034.53,2473.94)	96945(74044,124618)	14381.74(10504.51,19119.81)	3577(412,8889)	530.22(60.41,1301.29)	-0.0069	-0.0099	-0.0097
Cuba	51547(39867,65865)	1811.45(1164.99,2593.42)	588332(449168,751087)	18551.11(13468.39,24533.88)	21680(1494,52202)	682.86(43.14,1665.56)	33859(26621,41968)	1808.07(1163.11,2588.21)	364022(277993,464680)	18497.10(13430.04,24462.27)	13469(863,32419)	684.07(43.82,1663.19)	-0.0019	-0.0029	0.0018
Cyprus	4575(3444,5762)	2423.76(1499.59,3520.47)	39798(30389,50345)	20728.14(15079.30,27269.27)	1444(93,3550)	751.89(46.32,1818.16)	5166(3920,6514)	2425.49(1500.68,3522.90)	45902(35145,57997)	20751.02(15097.00,27299.26)	1661(109,4095)	750.75(46.67,1847.86)	0.0007	0.0011	-0.0015
Czechia	40388(30473,52355)	1694.40(1046.43,2497.09)	343059(257494,435426)	14518.41(10453.43,19148.70)	12638(1361,31398)	534.93(59.36,1337.07)	26663(20266,34377)	1692.81(1045.52,2494.69)	224387(168962,284613)	14502.53(10442.21,19128.99)	8240(882,20766)	532.85(59.00,1321.04)	-0.0009	-0.0011	-0.0039
CÔte d'Ivoire	72213(55329,90281)	1859.96(1151.97,2697.38)	635351(483253,822358)	16811.99(12157.80,22326.13)	23125(1873,56932)	612.35(49.36,1484.89)	161614(123354,202610)	1848.85(1145.79,2678.90)	1419005(1077456,1838034)	16689.97(12069.67,22178.15)	52278(4187,128984)	615.32(47.86,1505.56)	-0.006	-0.0073	0.0049
Democratic People's Republic of Korea	84190(63606,107791)	1553.44(953.97,2297.19)	720380(545015,931352)	12809.70(9172.64,17137.52)	26779(2198,64498)	475.88(38.10,1141.32)	81335(61313,104117)	1520.03(936.46,2243.72)	697109(527678,901847)	12472.39(8928.18,16676.28)	25934(2192,62062)	463.49(36.86,1122.64)	-0.0215	-0.0263	-0.026
Democratic Republic of the Congo	194974(148704,249898)	1600.72(984.60,2351.95)	1616588(1211731,2099638)	13672.91(9832.74,18133.13)	58400(5604,140549)	494.40(46.79,1193.38)	482661(367273,619353)	1597.97(982.84,2347.76)	4004112(2999835,5201241)	13648.17(9813.01,18100.58)	146479(13857,354331)	499.68(48.47,1197.74)	-0.0017	-0.0018	0.0107
Denmark	23516(17867,30377)	2201.50(1377.65,3225.09)	203771(154932,260877)	18047.52(13096.35,24009.43)	7427(526,18526)	657.48(45.31,1603.88)	23160(17413,29872)	2237.48(1416.81,3289.55)	197257(149778,250888)	18377.84(13478.60,24295.65)	7177(505,17984)	668.44(44.47,1638.73)	0.0163	0.0183	0.0167
Djibouti	1676(1264,2147)	1137.73(694.64,1694.46)	13795(10392,17698)	9430.59(6762.60,12493.30)	519(70,1264)	354.72(47.07,857.53)	4007(3027,5107)	1124.88(687.11,1675.19)	33145(25029,42575)	9319.98(6676.92,12354.48)	1250(173,3003)	351.41(48.86,846.26)	-0.0113	-0.0117	-0.0093
Dominica	411(323,514)	1805.37(1160.69,2585.34)	4223(3201,5417)	18484.80(13421.22,24442.16)	156(10,375)	682.26(43.36,1673.40)	292(230,365)	1811.23(1165.76,2591.77)	3065(2324,3927)	18516.82(13444.14,24492.10)	113(7,276)	681.62(44.68,1668.18)	0.0032	0.0017	-0.0009
Dominican Republic	43434(34325,54144)	1835.61(1181.18,2628.55)	449731(341300,575926)	18847.95(13678.99,24944.58)	16560(1081,39803)	693.93(43.06,1695.14)	50402(39688,62659)	1818.09(1169.54,2602.60)	535817(407412,685404)	18629.49(13523.94,24643.14)	19773(1290,48105)	687.21(42.40,1690.37)	-0.0095	-0.0116	-0.0097
Ecuador	48167(38578,59431)	1453.80(954.45,2058.16)	505095(394510,647344)	15521.44(11664.78,20160.48)	18542(1483,44569)	570.09(44.56,1393.44)	71625(55953,88224)	1488.36(952.51,2162.78)	772772(579409,998044)	15882.77(11575.05,21093.18)	28452(2285,67325)	584.66(43.70,1423.86)	0.0238	0.0233	0.0256
Egypt	328463(255982,413836)	1883.80(1193.61,2722.46)	3118914(2377319,3960493)	18246.37(13316.41,24018.01)	121424(11279,295005)	710.92(68.59,1731.61)	588431(474284,716627)	1955.09(1288.99,2776.04)	6006105(4835873,7431488)	20249.53(15700.88,25426.39)	233194(20178,568438)	786.56(70.41,1889.01)	0.0378	0.1098	0.1064
El Salvador	31629(24662,39095)	1739.16(1119.95,2521.01)	316649(239510,415577)	17920.62(13143.81,23982.40)	11637(819,28914)	658.75(44.96,1634.23)	29629(23180,36556)	1727.82(1113.43,2504.90)	312235(235760,408442)	17782.70(13039.86,23801.63)	11627(802,28533)	662.07(44.42,1639.96)	-0.0065	-0.0077	0.005
Equatorial Guinea	2134(1624,2733)	1610.55(990.28,2368.34)	17639(13226,22900)	13792.16(9924.89,18294.13)	637(63,1532)	498.92(49.88,1201.98)	8530(6477,11022)	1553.77(955.32,2280.17)	72284(54132,94011)	13245.02(9488.16,17562.15)	2665(267,6390)	488.36(46.96,1187.06)	-0.0353	-0.0397	-0.0212
Eritrea	13061(9912,16781)	1144.59(698.35,1704.91)	104683(78900,134416)	9495.08(6813.49,12573.97)	3850(510,9447)	349.70(48.61,856.36)	23862(17987,30516)	1142.16(697.56,1700.64)	196496(148109,252298)	9461.39(6785.55,12533.23)	7391(977,18206)	356.03(48.00,866.44)	-0.0021	-0.0035	0.0181
Estonia	5084(3817,6550)	1567.46(969.39,2311.35)	44220(33411,56268)	13429.82(9738.78,17784.45)	1688(238,3957)	512.08(71.32,1230.02)	3193(2422,4108)	1568.63(969.71,2313.94)	27010(20449,34429)	13453.54(9757.73,17812.98)	1029(141,2489)	512.85(72.22,1217.25)	0.0007	0.0018	0.0015
Eswatini	4542(3451,5806)	1615.24(993.26,2375.38)	37199(27933,48304)	13836.43(9955.76,18356.79)	1374(128,3293)	511.72(47.29,1236.06)	5886(4474,7586)	1596.79(981.67,2346.26)	50106(37664,65038)	13658.40(9821.16,18113.68)	1838(187,4437)	500.94(48.38,1203.32)	-0.0114	-0.0129	-0.0211
Ethiopia	173061(135904,212504)	1060.41(702.56,1498.58)	1315864(1033014,1659082)	8462.03(6412.34,10842.13)	48315(6420,119526)	311.57(43.19,766.39)	407137(317902,498113)	1076.50(718.24,1512.53)	3183604(2488006,3981217)	8503.65(6429.38,10915.76)	117279(15184,291795)	313.34(41.47,781.07)	0.0152	0.0049	0.0057
Fiji	4467(3386,5712)	1864.74(1164.14,2750.58)	36606(27653,47200)	15516.40(11217.15,20742.35)	1354(85,3409)	574.19(37.45,1410.98)	4481(3391,5748)	1864.12(1163.97,2749.56)	36940(27876,47611)	15501.89(11207.57,20723.67)	1366(90,3427)	573.27(38.47,1407.70)	-0.0003	-0.0009	-0.0016
Finland	23442(17676,29510)	2438.38(1508.66,3541.53)	206289(157883,260661)	20849.80(15172.72,27433.05)	7469(489,18364)	754.93(46.42,1850.58)	22167(16692,27947)	2435.69(1506.98,3537.72)	192724(147042,243762)	20817.62(15147.75,27390.00)	6962(436,17033)	752.04(45.80,1827.46)	-0.0011	-0.0015	-0.0038
France	301577(227883,385668)	2435.08(1524.46,3522.66)	2697221(2042128,3446766)	20795.03(15045.72,27436.73)	98119(7419,241237)	755.90(51.53,1846.63)	290749(223410,368393)	2394.57(1472.95,3464.09)	2512938(1940735,3206254)	20397.15(15111.67,26681.45)	91301(6546,224043)	740.90(53.78,1799.09)	-0.0166	-0.0191	-0.0198
Gabon	4992(3822,6407)	1609.66(990.19,2366.53)	41805(31393,54260)	13759.56(9904.35,18247.49)	1524(145,3615)	502.10(47.98,1210.00)	9175(6990,11808)	1619.17(996.14,2381.54)	77788(58538,100902)	13852.39(9973.91,18373.77)	2852(284,6860)	508.03(48.40,1214.88)	0.0059	0.0067	0.0118
Gambia	5955(4561,7468)	1866.31(1155.88,2707.28)	52074(39552,67468)	16873.42(12202.64,22403.29)	1909(149,4738)	619.19(48.19,1523.03)	15351(11675,19252)	1865.19(1155.49,2705.33)	136181(103473,176083)	16855.15(12189.04,22380.35)	4998(407,12557)	618.80(49.75,1511.25)	-0.0006	-0.0011	-0.0006
Georgia	22160(16847,28364)	1735.96(1072.80,2565.80)	190329(142754,247751)	14709.73(10605.16,19495.71)	6982(660,17228)	539.36(50.75,1330.71)	10717(8251,13589)	1713.90(1059.42,2533.79)	90047(67712,117287)	14504.16(10449.30,19230.61)	3289(303,8044)	530.02(48.37,1310.08)	-0.0127	-0.014	-0.0173
Germany	360026(274379,463524)	2519.57(1555.27,3660.14)	3454017(2643770,4319473)	22140.11(16175.98,29107.00)	124346(8335,302828)	796.37(48.03,1948.79)	314107(239152,404152)	2553.33(1579.86,3698.32)	2901765(2215205,3667951)	22334.21(16176.40,29228.00)	104051(6570,260235)	800.58(49.46,1971.06)	0.0134	0.0088	0.0053
Ghana	89214(68131,112017)	1859.59(1151.55,2696.42)	780185(592296,1011005)	16812.35(12159.11,22328.19)	28584(2178,70532)	616.38(49.74,1531.29)	196357(149560,245244)	1858.57(1151.24,2694.68)	1756254(1335641,2267250)	16794.93(12146.02,22306.47)	64645(5377,158227)	618.37(50.40,1518.32)	-0.0005	-0.001	0.0032
Greece	57427(44008,74844)	2483.08(1564.88,3594.60)	518777(399616,654564)	21808.61(15977.12,28832.94)	18741(1124,47282)	787.64(45.77,1946.75)	38168(28875,48436)	2492.85(1536.49,3593.51)	337283(256872,425847)	21629.13(15810.41,28543.71)	12123(723,29632)	777.26(46.37,1940.44)	0.0039	-0.0082	-0.0132
Greenland	301(226,392)	2275.57(1408.00,3353.88)	2667(2024,3408)	18188.61(13124.50,24071.35)	96(7,234)	655.58(44.90,1603.20)	256(193,331)	2300.07(1421.72,3390.15)	2113(1597,2708)	18473.26(13332.60,24426.33)	76(6,185)	663.60(44.93,1621.41)	0.0108	0.0156	0.0122
Grenada	489(384,612)	1816.54(1168.83,2599.95)	4862(3689,6248)	18598.76(13502.23,24602.21)	179(11,428)	683.38(43.18,1650.27)	435(342,542)	1801.81(1159.52,2578.43)	4721(3610,6023)	18397.90(13359.17,24326.53)	174(12,425)	677.91(43.45,1661.17)	-0.0081	-0.0108	-0.008
Guam	707(535,922)	1847.19(1155.11,2722.77)	6154(4638,7920)	15288.05(11049.90,20442.67)	230(15,568)	570.19(36.55,1406.97)	663(498,861)	1859.18(1161.35,2741.76)	5605(4224,7211)	15441.24(11162.77,20643.50)	208(14,524)	572.16(37.79,1420.58)	0.0065	0.01	0.0035
Guatemala	49580(38436,61346)	1747.14(1125.72,2531.63)	472914(357198,625394)	17982.08(13188.19,24066.06)	17300(1147,42460)	658.25(44.33,1628.56)	83885(65399,103975)	1734.77(1117.78,2514.13)	886840(668529,1162002)	17847.12(13087.28,23887.90)	32733(2313,80576)	658.55(44.77,1628.84)	-0.0071	-0.0075	0.0005
Guinea	32174(24635,40649)	1865.59(1154.30,2706.96)	276614(209703,358667)	16894.44(12218.93,22428.85)	10089(799,24697)	617.07(48.53,1519.06)	82850(63385,104426)	1866.76(1155.63,2708.43)	717750(544048,930268)	16891.26(12216.01,22425.70)	26339(2112,65670)	620.58(51.13,1543.51)	0.0006	-0.0002	0.0057
Guinea-Bissau	6207(4751,7850)	1866.86(1156.25,2708.06)	53396(40466,69190)	16877.63(12205.76,22408.50)	1948(146,4842)	616.51(47.59,1495.15)	12742(9730,16001)	1860.90(1152.85,2698.40)	111437(84590,144419)	16812.69(12158.40,22327.60)	4090(329,10023)	617.55(51.20,1504.72)	-0.0032	-0.0038	0.0017
Guyana	4727(3737,5895)	1829.32(1177.46,2618.73)	48667(36927,62314)	18752.82(13611.63,24813.98)	1783(121,4337)	686.88(45.35,1680.77)	3674(2891,4549)	1818.46(1169.94,2602.99)	39191(29845,50103)	18628.56(13523.29,24642.83)	1435(97,3516)	681.89(43.65,1689.00)	-0.0059	-0.0066	-0.0073
Haiti	36863(29059,45989)	1838.41(1183.18,2632.44)	363641(276207,467390)	18876.20(13699.28,24980.23)	13179(826,31790)	684.32(42.14,1682.85)	68163(53909,84988)	1822.76(1172.73,2609.33)	698998(530362,894802)	18683.53(13562.42,24716.80)	25402(1643,61601)	678.95(43.34,1636.51)	-0.0085	-0.0102	-0.0078
Honduras	27996(21706,34557)	1736.18(1118.25,2516.76)	270884(204789,357958)	17884.38(13116.53,23934.84)	10012(679,25001)	661.62(44.42,1636.25)	54349(42550,67129)	1731.90(1115.99,2510.24)	569363(429676,746472)	17819.54(13066.92,23851.05)	21074(1497,51776)	659.38(45.84,1626.81)	-0.0025	-0.0036	-0.0034
Hungary	39245(29719,50701)	1693.29(1045.75,2495.50)	332265(249739,421456)	14508.89(10446.80,19136.63)	12204(1360,30716)	533.10(59.61,1315.75)	24243(18180,31285)	1691.49(1044.69,2492.79)	213628(160224,271000)	14491.57(10434.38,19115.32)	7867(917,19531)	533.20(61.06,1326.23)	-0.0011	-0.0012	0.0002
Iceland	1524(1144,1926)	2440.02(1509.67,3543.82)	13396(10220,16939)	20867.53(15186.58,27457.63)	485(30,1217)	755.41(46.57,1852.52)	1651(1243,2077)	2437.63(1508.26,3540.65)	14348(10963,18138)	20851.32(15173.51,27431.31)	519(32,1273)	754.96(46.02,1860.29)	-0.001	-0.0008	-0.0006
India	5004490(4013088,6137137)	1925.62(1292.60,2691.45)	43211045(34218284,54344821)	16872.82(12792.80,21698.84)	1555476(109144,3799479)	607.60(41.87,1462.09)	7541750(6036192,9303188)	1920.50(1290.29,2671.00)	67431037(53640332,83535440)	16772.44(12888.79,21518.45)	2446522(171248,5915021)	608.18(42.33,1471.77)	-0.0027	-0.0059	0.001
Indonesia	1304876(1038178,1593209)	2181.44(1448.04,3037.08)	10512072(8143380,13260654)	17836.83(13387.86,22875.13)	393790(24219,978369)	668.29(41.54,1644.63)	1481411(1175184,1800221)	2167.96(1439.63,3019.29)	12422437(9633138,15641402)	17684.34(13268.52,22687.35)	467062(29121,1159372)	664.71(41.31,1630.46)	-0.0062	-0.0085	-0.0054
Iran (Islamic Republic of)	375598(300623,449133)	1995.20(1364.40,2767.52)	3406790(2718330,4189492)	18737.74(14455.44,23720.52)	131851(12916,317874)	726.04(75.48,1728.58)	357655(292748,429710)	2001.03(1371.46,2736.89)	3312024(2679482,4075506)	18787.96(14488.01,23693.95)	128062(12850,307575)	726.77(74.42,1735.68)	0.0029	0.0027	0.001
Iraq	115966(89890,144629)	1862.59(1174.72,2701.89)	1091618(828167,1414264)	17956.54(13050.64,23851.35)	42331(4060,104337)	696.67(68.15,1701.17)	233944(181344,292620)	1865.46(1176.11,2706.35)	2248546(1705906,2906529)	17983.12(13071.34,23883.89)	87513(8661,214918)	699.96(69.30,1709.02)	0.0015	0.0015	0.0047
Ireland	23849(18064,30355)	2436.16(1507.30,3538.48)	201461(152645,254687)	20836.78(15162.73,27414.51)	7261(445,17870)	750.95(46.80,1839.26)	24058(18257,30464)	2440.31(1509.87,3544.28)	204535(155713,258287)	20872.03(15189.89,27462.39)	7348(448,18381)	749.80(45.60,1836.29)	0.0017	0.0017	-0.0015
Israel	33350(25278,42336)	2436.05(1507.22,3538.33)	281764(213842,356108)	20843.31(15168.19,27424.60)	10258(653,25073)	758.80(46.31,1858.55)	55006(41723,69699)	2436.62(1507.58,3539.10)	468627(356710,591972)	20838.72(15164.26,27417.71)	17010(1067,41615)	756.42(47.49,1853.84)	0.0002	-0.0002	-0.0031
Italy	326163(257322,401630)	2689.57(1806.48,3688.91)	2949465(2319580,3637188)	22694.57(17440.56,28753.63)	107424(6245,263133)	826.38(46.60,2016.00)	230259(182511,276221)	2685.03(1812.56,3697.05)	2004314(1585532,2479404)	22668.81(17333.51,28893.77)	72828(4065,177945)	823.59(46.15,2029.51)	-0.0017	-0.0011	-0.0034
Jamaica	13934(11018,17380)	1825.70(1174.45,2613.91)	143007(108513,183086)	18728.21(13594.14,24776.42)	5279(323,12708)	691.34(43.47,1668.20)	12286(9655,15281)	1815.07(1167.85,2597.84)	133151(101735,169976)	18580.90(13489.55,24577.55)	4911(332,11821)	684.80(44.37,1688.60)	-0.0058	-0.0079	-0.0095
Japan	417382(324132,516844)	1500.50(1001.02,2099.75)	3372933(2650248,4194665)	11739.07(8945.90,14973.04)	122079(14041,313530)	424.24(47.71,1078.29)	264393(203583,328457)	1521.23(1025.68,2144.58)	2136428(1672600,2678798)	11847.20(8985.51,15310.16)	77173(8933,197907)	427.41(47.93,1078.32)	0.0138	0.0092	0.0075
Jordan	25169(19482,31484)	1853.73(1170.10,2687.79)	242069(183501,313363)	17877.44(12994.75,23743.48)	9459(918,23295)	698.67(68.06,1712.06)	69846(54026,87871)	1857.10(1171.81,2692.90)	679923(515515,879103)	17906.57(13013.98,23782.36)	26601(2724,65322)	700.34(68.70,1712.35)	0.0018	0.0016	0.0024
Kazakhstan	76053(58147,96845)	1735.41(1072.65,2564.40)	638964(479720,829904)	14685.83(10590.39,19468.57)	23338(2290,57862)	536.49(51.14,1314.39)	72371(55566,91017)	1735.05(1072.01,2564.26)	591065(444808,767833)	14700.78(10601.58,19485.27)	21584(2017,51980)	537.42(52.60,1327.13)	-0.0002	0.001	0.0017
Kenya	97222(75863,119824)	1211.15(800.48,1697.67)	758720(596322,958669)	9830.71(7444.36,12614.84)	28416(3861,69746)	369.04(52.42,899.31)	209089(162851,257932)	1207.08(797.81,1692.58)	1672558(1313511,2118959)	9799.03(7422.19,12575.45)	62769(8689,153206)	368.00(51.71,900.60)	-0.0034	-0.0032	-0.0028
Kiribati	416(314,537)	1866.63(1164.98,2753.63)	3492(2634,4492)	15546.92(11237.61,20782.17)	128(8,320)	572.00(39.49,1383.90)	667(506,851)	1870.42(1167.28,2759.58)	5452(4122,7030)	15578.23(11260.03,20824.04)	201(13,506)	575.78(38.24,1414.92)	0.002	0.002	0.0066
Kuwait	8641(6769,10734)	1885.78(1165.78,2743.87)	84333(63853,106413)	18231.91(13199.24,23879.86)	3289(317,8003)	710.79(65.89,1714.03)	15540(12112,19420)	1881.50(1174.61,2730.24)	152450(115585,196518)	18176.83(13252.28,24177.90)	5937(574,14553)	707.51(67.53,1707.20)	-0.0023	-0.003	-0.0046
Kyrgyzstan	22617(17290,28777)	1739.10(1074.75,2569.84)	188666(141650,244806)	14725.03(10620.37,19518.17)	6884(630,17417)	537.45(50.17,1344.18)	31082(23951,39180)	1734.69(1071.87,2563.63)	257908(194117,335210)	14693.25(10596.18,19476.11)	9401(911,23117)	535.96(50.60,1322.38)	-0.0025	-0.0022	-0.0028
Lao People's Democratic Republic	27480(20887,35277)	2087.54(1276.19,3043.00)	221247(165772,284065)	17576.47(12553.52,23307.78)	8238(498,20466)	654.80(40.31,1609.07)	42904(32466,55032)	2073.48(1267.85,3021.85)	366672(273940,468446)	17410.54(12435.98,23080.68)	13738(845,34326)	652.15(38.36,1627.86)	-0.0067	-0.0094	-0.004
Latvia	8344(6252,10745)	1570.62(971.27,2316.14)	73971(55904,93955)	13460.86(9762.64,17824.60)	2832(405,6760)	514.47(71.09,1251.33)	4273(3231,5524)	1568.19(969.52,2313.09)	36272(27434,46244)	13447.39(9752.78,17805.34)	1384(194,3326)	513.29(71.99,1243.35)	-0.0015	-0.001	-0.0023
Lebanon	16269(12605,20370)	1871.52(1178.69,2717.06)	156392(118637,202116)	18049.63(13127.35,23968.52)	6061(604,14842)	699.58(70.78,1689.21)	22032(17096,27533)	1854.27(1169.22,2690.22)	211916(160848,273878)	17899.13(13010.89,23779.19)	8229(799,20064)	695.11(68.03,1680.95)	-0.0092	-0.0083	-0.0064
Lesotho	7983(6048,10206)	1620.68(996.52,2384.41)	63980(48155,83122)	13895.91(10002.15,18439.74)	2356(227,5630)	512.51(49.73,1221.81)	9770(7402,12618)	1601.90(985.20,2353.93)	84044(63266,109061)	13691.40(9847.69,18157.35)	3083(311,7361)	502.03(48.10,1218.48)	-0.0116	-0.0147	-0.0204
Liberia	13835(10579,17378)	1864.49(1154.35,2704.99)	120731(91614,156497)	16867.20(12198.05,22395.88)	4332(348,10780)	605.47(48.74,1489.67)	33944(25863,42649)	1858.19(1151.31,2694.01)	298222(226303,386287)	16783.89(12137.45,22292.35)	10808(879,26586)	608.50(49.30,1482.08)	-0.0034	-0.0049	0.005
Libya	28195(21878,35080)	1874.28(1182.07,2718.83)	262699(199490,340588)	18038.48(13107.02,23950.36)	10251(971,25412)	704.74(70.81,1736.53)	31913(24661,40395)	1871.32(1179.38,2715.20)	317347(240824,408987)	18032.45(13111.45,23944.36)	12372(1230,30217)	702.22(69.65,1716.42)	-0.0016	-0.0003	-0.0036
Lithuania	12233(9061,15838)	1516.79(930.43,2237.52)	105957(80167,137780)	12722.86(9209.11,16937.48)	4027(567,9829)	482.69(62.24,1167.45)	6152(4616,7914)	1512.82(927.89,2232.19)	53462(40568,69534)	12693.98(9188.02,16899.13)	2028(274,4943)	480.59(61.37,1155.40)	-0.0026	-0.0023	-0.0044
Luxembourg	1670(1260,2165)	2382.05(1476.19,3476.03)	15153(11522,19189)	20135.15(14569.85,26616.52)	552(45,1337)	732.51(52.89,1776.83)	2491(1884,3203)	2369.80(1468.31,3457.78)	21952(16654,27846)	20030.08(14490.84,26488.55)	799(60,1931)	728.69(52.59,1769.29)	-0.0051	-0.0052	-0.0052
Madagascar	44713(33935,57482)	1153.18(703.79,1716.73)	358486(270049,460011)	9559.81(6862.40,12660.86)	13253(1760,32076)	354.16(48.06,853.96)	111733(84575,143373)	1154.48(704.72,1718.39)	907870(683575,1164994)	9567.30(6867.69,12671.73)	33802(4455,82610)	356.68(46.77,860.36)	0.0011	0.0008	0.0071
Malawi	36810(27919,47151)	1155.53(705.10,1720.12)	298995(225324,383574)	9580.85(6878.87,12688.45)	11019(1462,26833)	353.54(48.88,859.01)	82829(62583,106557)	1155.99(705.53,1720.62)	671649(505096,861779)	9581.27(6878.77,12689.43)	25138(3423,63188)	359.05(48.01,881.35)	0.0004	0	0.0156
Malaysia	102641(77384,129276)	1903.58(1185.42,2784.93)	820404(620108,1052298)	15354.63(11072.24,20273.21)	30904(2067,75621)	578.48(38.78,1430.88)	154340(115495,197875)	1937.64(1188.41,2835.34)	1301708(985394,1675144)	15769.48(11479.76,20921.66)	48994(3274,120877)	593.38(37.46,1477.19)	0.0179	0.027	0.0258
Maldives	1509(1152,1930)	2077.32(1269.93,3027.85)	12300(9221,15766)	17465.49(12474.87,23156.08)	457(27,1128)	649.54(37.73,1597.83)	2010(1532,2572)	2043.83(1250.28,2977.44)	17243(12945,22064)	17045.02(12203.60,22641.67)	646(39,1595)	638.13(37.80,1573.18)	-0.0161	-0.0241	-0.0176
Mali	48965(37492,61890)	1864.11(1153.69,2704.30)	420740(318996,545606)	16872.03(12202.51,22400.63)	15339(1185,38032)	616.07(49.48,1507.74)	152016(116261,191594)	1860.20(1152.35,2697.31)	1320722(1001475,1712137)	16807.93(12155.10,22321.92)	48392(3655,117347)	616.48(48.06,1498.89)	-0.0021	-0.0038	0.0007
Malta	1997(1513,2533)	2430.07(1503.54,3529.60)	16919(12861,21379)	20796.47(15132.08,27360.12)	613(38,1518)	752.89(47.16,1847.60)	1520(1150,1921)	2431.17(1504.26,3531.04)	13523(10343,17092)	20807.57(15140.28,27372.71)	489(32,1197)	752.45(46.64,1844.91)	0.0005	0.0005	-0.0006
Marshall Islands	293(222,376)	1864.81(1164.10,2750.72)	2279(1734,2950)	15520.84(11219.85,20748.17)	84(5,208)	575.19(36.54,1413.43)	310(233,400)	1866.01(1165.07,2752.54)	2570(1936,3309)	15520.16(11220.42,20747.90)	95(6,240)	576.41(37.52,1411.87)	0.0006	0	0.0021
Mauritania	12086(9230,15184)	1862.97(1154.02,2701.84)	105651(80176,136932)	16835.79(12175.14,22355.70)	3880(301,9615)	618.83(49.92,1495.79)	27333(20878,34395)	1865.49(1155.47,2705.97)	238495(180830,309100)	16863.44(12195.23,22390.77)	8787(724,21776)	621.83(50.14,1527.52)	0.0014	0.0016	0.0048
Mauritius	6722(5104,8556)	2072.49(1267.52,3020.05)	56483(42331,72180)	17386.08(12419.24,23050.12)	2112(126,5194)	650.08(40.65,1600.86)	5215(3950,6760)	2074.30(1268.55,3022.84)	46310(34651,59115)	17410.60(12435.97,23080.79)	1729(108,4289)	650.07(38.73,1612.00)	0.0009	0.0014	0
Mexico	517196(419709,622302)	1765.48(1208.37,2433.20)	4991605(3989409,6170371)	17232.71(13162.68,21799.93)	185879(12996,449731)	641.80(46.25,1560.69)	578784(467389,699472)	1769.39(1201.62,2433.78)	5780338(4595374,7148665)	17334.70(13207.86,22001.44)	215155(15717,519768)	645.06(47.07,1573.96)	0.0022	0.0059	0.0051
Micronesia (Federated States of)	658(499,846)	1865.28(1164.15,2751.51)	5161(3917,6686)	15540.77(11233.12,20773.17)	191(13,476)	575.47(38.74,1388.91)	581(437,754)	1861.12(1162.11,2744.85)	4866(3660,6260)	15476.83(11189.97,20689.80)	180(13,453)	572.73(39.02,1409.97)	-0.0022	-0.0041	-0.0048
Monaco	102(76,131)	2431.28(1504.41,3530.54)	955(727,1202)	20851.96(15175.10,27428.82)	35(2,85)	754.61(47.25,1869.11)	126(95,160)	2437.32(1507.96,3539.92)	1120(853,1415)	20829.18(15156.88,27407.42)	40(3,101)	751.63(46.25,1870.16)	0.0025	-0.0011	-0.0039
Mongolia	12425(9510,15764)	1739.69(1075.07,2570.82)	103311(77604,134075)	14734.51(10626.88,19529.02)	3760(341,9243)	536.51(49.08,1318.05)	13380(10328,16761)	1735.27(1072.21,2564.54)	109743(82703,142629)	14700.48(10601.19,19485.34)	3988(354,9842)	534.80(48.54,1312.62)	-0.0025	-0.0023	-0.0032
Montenegro	2660(2003,3438)	1688.92(1043.16,2488.77)	23115(17340,29258)	14464.70(10414.75,19083.39)	853(98,2107)	533.21(58.96,1324.39)	1948(1462,2510)	1685.22(1040.61,2484.06)	17220(12914,21859)	14444.63(10399.93,19055.54)	634(73,1582)	531.16(60.64,1332.18)	-0.0022	-0.0014	-0.0038
Morocco	153496(119110,191372)	1881.91(1185.70,2731.00)	1461094(1108434,1888654)	18113.84(13167.08,24044.45)	56832(5640,138894)	704.87(69.37,1720.97)	173612(134412,218561)	1871.82(1179.58,2716.07)	1690746(1283269,2182122)	18037.95(13116.29,23951.16)	65806(6617,162504)	701.80(71.33,1729.07)	-0.0054	-0.0042	-0.0044
Mozambique	49048(37283,62740)	1164.95(710.10,1734.18)	386185(291382,496586)	9675.67(6954.18,12814.26)	14139(1878,34389)	355.21(48.21,851.78)	124303(94319,159751)	1160.84(707.91,1727.95)	998398(751770,1280776)	9632.37(6919.56,12756.28)	36781(4932,88827)	355.44(47.55,854.12)	-0.0035	-0.0045	0.0006
Myanmar	272746(206647,348386)	2081.66(1272.92,3033.90)	2277762(1704575,2912411)	17496.38(12496.83,23197.94)	84757(5041,210067)	651.09(38.71,1606.89)	314349(237969,403409)	2077.50(1270.31,3027.79)	2681219(2001840,3425262)	17455.12(12467.39,23141.94)	100494(6243,247938)	654.08(37.56,1614.06)	-0.002	-0.0024	0.0046
Namibia	7693(5859,9901)	1607.05(988.49,2362.19)	64525(48450,83768)	13738.10(9885.64,18219.00)	2379(234,5709)	506.61(48.74,1226.27)	11990(9121,15440)	1604.90(987.21,2358.75)	102019(76699,132390)	13713.83(9866.57,18187.11)	3756(354,8922)	504.99(48.87,1212.33)	-0.0013	-0.0018	-0.0032
Nauru	57(43,73)	1867.46(1165.78,2754.86)	465(351,600)	15540.98(11234.52,20775.12)	17(1,43)	577.00(37.85,1434.93)	64(48,82)	1860.58(1161.72,2744.01)	528(398,680)	15479.97(11191.71,20693.28)	20(1,49)	574.67(37.89,1421.67)	-0.0037	-0.0039	-0.004
Nepal	118976(91509,147891)	1952.81(1216.30,2861.85)	1061516(803827,1362156)	18067.82(13055.38,24154.14)	38275(2445,93615)	651.72(42.79,1587.69)	180535(138996,227697)	1945.58(1199.81,2844.42)	1716530(1292360,2205542)	17969.70(12940.95,23892.43)	62612(4075,154811)	655.13(41.08,1606.80)	-0.0037	-0.0054	0.0052
Netherlands	72207(56012,93782)	2284.08(1424.34,3299.88)	656889(508620,825771)	19268.24(14305.60,25288.15)	23804(1476,58452)	697.97(40.79,1704.02)	71033(54064,91990)	2405.65(1502.96,3533.76)	626841(478590,790745)	20326.36(14820.67,26649.64)	22590(1313,56908)	732.24(40.87,1823.36)	0.0532	0.0549	0.0491
New Zealand	16350(12799,20348)	1963.76(1296.59,2719.38)	132015(103294,166471)	15334.65(11545.71,19593.02)	4698(415,11892)	545.37(47.10,1345.50)	19571(15498,24092)	1953.50(1290.65,2704.86)	157366(123605,198350)	15247.18(11479.69,19481.77)	5619(477,14154)	544.30(48.16,1350.92)	-0.0052	-0.0057	-0.002
Nicaragua	23800(18517,29274)	1741.44(1121.60,2524.02)	233071(176259,307231)	17937.59(13156.08,24005.44)	8588(576,20902)	660.93(45.03,1619.31)	32077(25179,39513)	1721.69(1110.25,2495.53)	333519(252017,437279)	17689.24(12968.20,23681.33)	12385(888,30441)	656.79(43.51,1625.87)	-0.0113	-0.0138	-0.0063
Niger	47319(36239,59978)	1872.21(1159.57,2716.83)	404349(306506,523951)	16931.00(12243.91,22478.54)	14777(1172,36952)	619.61(50.50,1532.76)	161493(123524,204658)	1863.61(1154.40,2703.13)	1388189(1051638,1797432)	16843.63(12180.45,22366.20)	51156(4017,125539)	621.58(50.08,1540.70)	-0.0046	-0.0052	0.0032
Nigeria	571947(457590,696585)	1997.72(1359.12,2751.08)	4932058(3895942,6189454)	17673.14(13434.02,22589.97)	179011(14957,437829)	641.90(52.85,1571.79)	1573664(1256327,1955684)	1981.81(1338.68,2760.12)	13208189(10609011,16261289)	17252.32(13095.30,22077.71)	484062(39946,1166174)	632.88(52.61,1550.97)	-0.008	-0.0238	-0.0141
Niue	12(9,15)	1845.85(1153.97,2720.82)	96(72,124)	15324.75(11078.85,20488.82)	4(0,9)	569.46(39.89,1383.75)	7(5,9)	1845.75(1153.83,2720.72)	61(46,78)	15351.71(11100.30,20522.48)	2(0,6)	569.86(38.63,1408.44)	-0.0001	0.0018	0.0007
North Macedonia	8609(6486,11126)	1693.97(1046.07,2496.56)	74522(55903,94340)	14517.10(10452.59,19146.91)	2744(310,6808)	534.42(60.87,1332.40)	6093(4586,7872)	1688.14(1042.62,2487.92)	54830(41204,69656)	14462.32(10413.10,19079.00)	2018(229,5059)	531.41(59.22,1325.64)	-0.0034	-0.0038	-0.0056
Northern Mariana Islands	233(176,305)	1896.96(1183.10,2800.50)	2076(1565,2668)	15808.25(11418.49,21141.81)	77(5,192)	586.82(37.90,1448.19)	214(163,274)	1858.13(1160.45,2740.14)	1756(1325,2264)	15453.27(11173.46,20657.71)	65(5,160)	573.82(38.84,1427.61)	-0.0205	-0.0225	-0.0222
Norway	21018(16688,25729)	2326.44(1549.99,3242.22)	173991(139499,212124)	18241.19(14043.10,23223.96)	6279(430,15116)	657.86(43.89,1584.81)	25119(19917,30557)	2579.92(1755.10,3544.47)	216468(172017,268947)	21598.59(16569.03,27258.55)	7776(471,18901)	775.79(45.19,1897.07)	0.109	0.1841	0.1793
Oman	10379(8075,12825)	1828.47(1157.66,2647.29)	94452(71995,122525)	17649.69(12827.70,23451.09)	3685(347,9029)	690.09(68.77,1672.20)	17397(13592,21491)	1849.81(1168.68,2679.10)	164537(125295,212387)	17828.50(12948.78,23675.05)	6426(640,15941)	696.75(71.07,1710.61)	0.0117	0.0101	0.0097
Pakistan	690744(552234,836505)	1898.80(1280.06,2622.56)	5773027(4530802,7243578)	16505.79(12488.32,21100.78)	207611(13202,504639)	594.14(37.85,1453.11)	1387809(1105150,1685212)	1902.18(1282.18,2627.02)	11919660(9356249,14878840)	16488.93(12489.47,21072.83)	426763(23721,1047913)	590.43(32.69,1455.07)	0.0018	-0.001	-0.0062
Palau	86(65,112)	1857.85(1160.54,2739.66)	730(549,939)	15429.42(11154.07,20627.65)	27(2,68)	573.59(38.16,1414.93)	65(49,84)	1851.53(1157.61,2729.60)	541(407,697)	15332.03(11081.62,20500.25)	20(1,51)	569.59(38.27,1392.71)	-0.0034	-0.0063	-0.007
Palestine	12925(10030,16101)	1869.50(1178.27,2712.46)	121348(92114,157116)	18017.92(13098.88,23926.44)	4722(446,11825)	701.90(70.67,1738.68)	31142(24196,38782)	1868.87(1178.09,2711.33)	296638(225164,383434)	18010.28(13092.25,23917.01)	11546(1182,28606)	701.32(70.87,1717.80)	-0.0003	-0.0004	-0.0008
Panama	13001(10198,16049)	1727.00(1113.36,2502.85)	134227(101476,176174)	17747.88(13012.08,23758.64)	4981(334,12232)	658.56(43.72,1634.48)	18751(14714,23085)	1720.81(1109.97,2493.56)	195207(147449,255706)	17669.04(12952.41,23655.86)	7258(495,17792)	656.91(44.51,1618.19)	-0.0036	-0.0044	-0.0025
Papua New Guinea	24504(18574,31330)	1856.88(1159.75,2738.20)	200460(151337,258470)	15453.31(11172.76,20656.79)	7357(521,18129)	567.23(37.81,1399.20)	56723(42981,72853)	1853.00(1157.72,2732.08)	469405(353850,604882)	15408.55(11140.91,20597.93)	17352(1201,43285)	569.66(37.67,1376.16)	-0.0021	-0.0029	0.0043
Paraguay	27779(22412,33699)	2157.68(1465.09,2988.99)	326060(253025,422683)	26433.50(19892.57,34731.60)	12075(495,29985)	978.37(39.56,2446.72)	41897(33702,50930)	2150.07(1459.93,2978.55)	523365(403830,674435)	26296.03(19779.30,34562.89)	19318(831,48030)	970.90(40.41,2413.19)	-0.0035	-0.0052	-0.0076
Peru	81710(65345,100215)	1147.47(753.63,1616.75)	794740(617945,1005861)	11298.46(8570.26,14659.28)	29106(3270,71284)	414.07(44.99,1020.63)	110056(85656,137024)	1227.91(786.26,1761.58)	1105735(840231,1443856)	11992.07(8818.48,15950.85)	40661(4272,99852)	440.42(42.75,1082.91)	0.0701	0.0614	0.0636
Philippines	449103(356817,549083)	2178.36(1446.29,3032.76)	3608512(2795008,4555540)	17786.31(13347.73,22812.72)	134652(8222,335217)	663.80(40.67,1637.72)	702647(557278,855329)	2169.75(1440.74,3021.62)	5780899(4480570,7283238)	17705.71(13285.17,22713.19)	216275(13497,538361)	662.34(40.80,1629.14)	-0.004	-0.0045	-0.0022
Poland	153622(121410,188659)	1776.29(1195.37,2494.56)	1258582(982448,1567472)	14863.64(11323.63,19085.52)	46285(5453,113721)	546.99(63.13,1350.01)	102891(81530,126008)	1774.63(1194.24,2492.21)	869298(682806,1075709)	14850.61(11313.13,19068.63)	31998(3887,78452)	546.54(63.80,1348.18)	-0.0009	-0.0009	-0.0008
Portugal	60540(45631,76591)	2444.10(1512.24,3549.64)	526020(400543,665250)	20904.92(15214.94,27505.17)	18952(1212,46960)	753.07(46.53,1839.33)	39203(29406,49866)	2438.92(1509.01,3542.33)	350966(267402,442996)	20861.02(15181.46,27447.63)	12615(863,31259)	749.84(47.21,1845.27)	-0.0021	-0.0021	-0.0043
Puerto Rico	17856(14099,22302)	1818.75(1169.60,2603.71)	183309(139053,234818)	18647.64(13537.28,24661.28)	6777(442,16741)	689.41(43.34,1688.43)	10614(8316,13251)	1815.67(1167.84,2599.10)	114897(87521,146859)	18600.61(13503.76,24599.87)	4252(290,10379)	687.81(42.71,1686.97)	-0.0017	-0.0025	-0.0023
Qatar	1745(1362,2180)	1793.47(1140.22,2592.42)	17129(13031,22121)	17342.11(12612.66,23027.23)	672(67,1663)	679.88(69.09,1663.37)	7636(5977,9573)	1795.77(1142.26,2591.57)	77218(58972,99216)	17330.73(12571.04,22984.70)	3035(311,7415)	679.31(67.24,1674.38)	0.0013	-0.0007	-0.0008
Republic of Korea	221801(163793,290588)	1717.08(1048.62,2538.76)	1912782(1443350,2440454)	14207.52(10224.56,18914.87)	68359(6282,177748)	507.23(44.78,1285.51)	124153(92479,160371)	1649.96(1010.06,2427.80)	1081857(820442,1387474)	13510.20(9719.39,17932.23)	38925(3644,99959)	485.45(44.48,1220.92)	-0.0391	-0.0491	-0.0429
Republic of Moldova	16320(12316,21095)	1578.12(975.23,2328.51)	138059(104381,175900)	13553.21(9834.20,17940.78)	5265(734,12757)	517.42(71.06,1246.45)	8493(6393,10892)	1567.80(969.20,2312.67)	74118(56072,94124)	13448.46(9753.60,17805.84)	2831(403,6810)	513.10(73.05,1225.65)	-0.0065	-0.0077	-0.0083
Romania	99632(75178,128642)	1696.67(1047.64,2500.68)	863040(647485,1092121)	14544.33(10472.04,19179.74)	31765(3565,80438)	535.18(59.37,1332.77)	52292(39426,67556)	1691.23(1044.51,2492.45)	451146(338548,571285)	14489.88(10433.13,19113.12)	16613(1893,41331)	533.47(58.78,1334.30)	-0.0032	-0.0037	-0.0032
Russian Federation	539676(427001,657087)	1720.34(1166.94,2407.40)	4613876(3648509,5726878)	14618.76(11059.91,18447.87)	177402(27474,419587)	561.87(84.75,1342.61)	407791(323623,496867)	1717.29(1164.84,2403.42)	3400896(2682917,4227756)	14599.60(11045.14,18423.19)	130530(19719,309591)	561.02(84.30,1329.07)	-0.0018	-0.0013	-0.0015
Rwanda	26537(20169,34133)	1156.11(705.66,1720.70)	212066(159815,272093)	9581.42(6878.64,12690.66)	7895(1032,19280)	357.62(48.22,872.92)	49845(37532,63872)	1152.97(703.86,1716.21)	410697(309150,527591)	9553.96(6857.27,12654.26)	15398(2116,37455)	358.32(49.87,865.51)	-0.0027	-0.0029	0.002
Saint Kitts and Nevis	232(183,290)	1820.98(1171.98,2606.36)	2366(1795,3030)	18647.66(13536.89,24671.03)	87(6,215)	687.07(43.47,1667.60)	208(162,262)	1822.23(1172.46,2608.53)	2306(1762,2942)	18674.95(13556.27,24706.01)	85(6,206)	688.96(44.49,1683.11)	0.0007	0.0015	0.0028
Saint Lucia	834(659,1042)	1825.59(1174.58,2613.66)	8478(6433,10859)	18721.08(13588.93,24769.37)	311(20,751)	686.89(44.46,1677.13)	623(488,779)	1811.56(1165.51,2592.73)	6805(5196,8690)	18535.35(13457.56,24511.89)	250(17,598)	680.53(42.31,1654.62)	-0.0077	-0.0099	-0.0093
Saint Vincent and the Grenadines	690(544,863)	1817.48(1169.69,2601.09)	6937(5263,8904)	18602.29(13504.79,24608.03)	255(17,614)	685.09(43.61,1685.56)	472(373,587)	1811.51(1165.81,2592.38)	4937(3749,6317)	18525.24(13450.08,24503.04)	182(12,439)	681.45(43.46,1677.16)	-0.0033	-0.0041	-0.0053
Samoa	1102(835,1412)	1843.93(1152.97,2717.76)	8892(6706,11500)	15310.94(11067.61,20468.10)	329(22,823)	567.47(37.71,1396.51)	1177(891,1503)	1860.66(1161.87,2744.11)	9557(7219,12335)	15470.92(11185.95,20682.03)	354(24,876)	573.28(38.65,1413.31)	0.0091	0.0104	0.0102
San Marino	133(100,170)	2454.12(1518.51,3563.80)	1212(922,1528)	20998.03(15286.33,27628.15)	44(3,108)	761.58(47.90,1841.10)	129(97,164)	2429.88(1503.45,3529.08)	1147(874,1450)	20811.51(15143.96,27379.25)	41(3,102)	751.16(46.62,1826.90)	-0.0099	-0.0089	-0.0137
Sao Tome and Principe	777(595,988)	1857.77(1151.50,2692.84)	6614(5012,8574)	16768.70(12126.36,22274.20)	244(19,603)	618.95(50.65,1519.53)	1327(1009,1668)	1860.54(1153.15,2697.48)	11743(8915,15195)	16796.20(12145.89,22307.13)	434(37,1065)	620.91(49.47,1525.87)	0.0015	0.0016	0.0032
Saudi Arabia	92211(71943,113908)	1809.36(1142.44,2623.03)	874111(665213,1121031)	17405.14(12734.83,22832.66)	34140(3420,83135)	680.21(67.98,1658.29)	142946(111794,178660)	1800.89(1138.40,2609.34)	1451986(1106274,1849697)	17362.60(12711.57,22780.26)	56996(6297,139960)	680.12(67.63,1637.74)	-0.0047	-0.0024	-0.0001
Senegal	46497(35574,58665)	1871.69(1159.55,2715.62)	402026(304649,520901)	16917.67(12234.27,22461.12)	14656(1167,36750)	617.31(49.23,1497.41)	97803(74352,122703)	1847.82(1145.25,2677.10)	864766(656768,1119034)	16677.93(12061.09,22163.81)	31774(2536,77679)	613.12(47.84,1501.23)	-0.0128	-0.0142	-0.0068
Serbia	36926(27821,47736)	1695.16(1047.30,2497.64)	318713(239164,403516)	14514.63(10445.90,19128.54)	11743(1284,29434)	534.64(58.13,1315.87)	26799(20105,34653)	1677.14(1034.95,2473.28)	235299(176679,298221)	14397.62(10358.24,18977.53)	8682(964,21691)	530.82(59.08,1309.27)	-0.0106	-0.0081	-0.0071
Seychelles	462(350,592)	2076.93(1269.95,3026.99)	3912(2922,4998)	17447.93(12462.64,23131.52)	147(8,366)	655.77(38.14,1605.16)	451(342,578)	2066.86(1264.21,3011.65)	3811(2851,4873)	17314.79(12374.89,22963.69)	143(9,356)	648.74(39.50,1612.78)	-0.0048	-0.0076	-0.0107
Sierra Leone	22909(17469,28594)	1867.85(1155.94,2710.31)	204371(155447,263857)	16910.27(12230.29,22449.30)	7453(601,18503)	616.98(49.24,1500.27)	54402(41277,68047)	1865.41(1155.70,2705.65)	489538(372403,631455)	16855.59(12189.23,22381.14)	18002(1447,44332)	619.90(48.47,1521.07)	-0.0013	-0.0032	0.0047
Singapore	9732(7516,12634)	1200.11(762.06,1756.33)	80421(63085,102021)	9268.02(6899.22,12198.58)	2996(395,7290)	344.29(43.96,853.35)	9888(7285,12811)	1380.02(843.74,2027.70)	79517(60008,102170)	10708.26(7771.23,14370.24)	2912(329,7218)	391.61(44.24,959.33)	0.1499	0.1554	0.1374
Slovakia	21714(16447,28070)	1696.01(1047.41,2499.40)	183589(137955,232929)	14532.23(10463.11,19165.61)	6768(743,16768)	536.02(58.90,1329.12)	14066(10635,18125)	1692.37(1045.20,2494.13)	122147(91709,154689)	14500.36(10440.73,19126.08)	4507(503,11156)	534.72(58.52,1323.05)	-0.0021	-0.0022	-0.0024
Slovenia	7453(5619,9599)	1696.36(1047.30,2500.49)	65153(48891,82578)	14546.99(10473.99,19182.40)	2405(274,6059)	536.66(60.66,1345.25)	5004(3796,6440)	1690.16(1043.89,2490.84)	42842(32199,54236)	14479.39(10425.56,19100.25)	1577(178,3928)	532.97(59.97,1322.26)	-0.0037	-0.0046	-0.0069
Solomon Islands	2181(1653,2791)	1862.22(1162.56,2746.64)	17534(13262,22666)	15504.21(11208.02,20725.02)	649(43,1634)	573.63(37.02,1403.38)	3945(2983,5054)	1859.19(1160.97,2741.84)	32312(24380,41648)	15472.04(11185.69,20682.43)	1197(82,3005)	573.34(39.69,1413.13)	-0.0016	-0.0021	-0.0005
Somalia	29555(22433,37793)	1132.35(691.26,1686.82)	229512(173100,296137)	9389.34(6731.35,12440.79)	8483(1126,20552)	348.44(48.87,852.96)	83729(63356,107511)	1140.65(696.65,1698.44)	676712(509695,869094)	9449.00(6776.05,12517.61)	25252(3336,60941)	353.19(47.23,862.98)	0.0073	0.0064	0.0136
South Africa	199297(156378,247507)	1686.89(1116.08,2345.75)	1654967(1305633,2084281)	14014.85(10603.74,17941.05)	60859(6478,145588)	515.33(53.61,1245.25)	239702(188172,296136)	1675.84(1109.22,2329.48)	1998650(1576980,2521150)	13907.42(10526.21,17817.11)	73349(7738,176656)	510.34(53.00,1228.86)	-0.0066	-0.0077	-0.0097
South Sudan	22800(17258,29230)	1139.86(695.98,1697.59)	185032(139441,237432)	9446.61(6774.77,12513.94)	6873(876,16708)	351.36(50.24,846.94)	39503(29817,50942)	1146.69(699.31,1708.24)	315071(237224,405050)	9517.89(6832.08,12602.46)	11710(1597,28688)	354.49(48.71,853.46)	0.006	0.0075	0.0089
Spain	239058(183992,307626)	2482.99(1557.25,3586.03)	2128359(1612255,2649045)	21553.15(15701.03,28476.78)	77460(4863,191052)	784.11(49.10,1940.38)	173064(133157,222421)	2481.34(1551.04,3586.54)	1513852(1152479,1887386)	21555.91(15740.98,28521.69)	54913(3717,135764)	781.84(52.37,1902.13)	-0.0007	0.0001	-0.0029
Sri Lanka	107555(81558,137457)	2074.92(1268.79,3023.88)	901539(674598,1152383)	17423.58(12445.08,23098.70)	33685(1968,83523)	651.03(38.44,1610.06)	108329(81845,139040)	2076.40(1269.75,3026.03)	915674(683724,1170360)	17437.68(12455.01,23118.05)	34315(2053,85074)	653.38(38.69,1618.04)	0.0007	0.0008	0.0036
Sudan	123939(96226,154262)	1880.63(1183.96,2730.25)	1158557(879701,1499786)	18121.40(13174.51,24062.88)	44907(4388,111631)	703.20(71.67,1717.09)	270458(209775,337004)	1866.12(1176.21,2707.78)	2571007(1950584,3326092)	17993.37(13081.81,23896.77)	100014(9910,247277)	700.33(70.56,1723.66)	-0.0077	-0.0071	-0.0041
Suriname	2172(1714,2700)	1812.92(1167.51,2593.53)	22715(17245,29076)	18516.75(13443.73,24495.83)	835(53,2016)	680.83(43.33,1674.99)	2555(2023,3174)	1808.88(1162.80,2590.40)	26378(20020,33764)	18534.29(13456.57,24506.54)	966(65,2333)	678.80(42.34,1659.39)	-0.0022	0.0009	-0.003
Sweden	41126(32473,49977)	2546.31(1722.05,3487.14)	360805(286763,444369)	21113.97(16251.46,26727.23)	13003(786,31717)	760.77(43.54,1879.50)	44788(35547,54536)	2529.52(1712.33,3483.49)	373283(299369,460777)	20976.43(16179.39,26694.65)	13428(769,32647)	754.53(43.79,1828.14)	-0.0066	-0.0065	-0.0082
Switzerland	29226(22385,37534)	2267.75(1419.15,3300.37)	260066(195790,332332)	18725.69(13641.52,24915.70)	9357(647,22980)	673.95(45.64,1659.65)	30444(22950,39325)	2272.74(1408.01,3346.46)	260841(195653,332905)	18770.30(13657.84,25085.35)	9391(664,23310)	675.51(46.48,1657.51)	0.0022	0.0024	0.0023
Syrian Arab Republic	83507(64923,103714)	1871.51(1179.52,2715.35)	770749(585751,999188)	18032.93(13110.76,23944.80)	30013(2796,74279)	703.34(67.68,1725.94)	86693(66346,110069)	1902.82(1196.35,2764.99)	848693(643228,1096403)	18314.42(13315.15,24336.09)	32784(3054,80228)	706.92(69.76,1731.42)	0.0167	0.0156	0.0051
Taiwan (Province of China)	92646(71365,118836)	1627.42(1041.94,2355.02)	801106(640168,989087)	13947.52(10540.17,17928.54)	29729(2159,73888)	517.57(37.48,1259.20)	54985(41633,70650)	1621.35(999.83,2395.74)	502811(377212,645079)	13714.92(9813.99,18291.16)	18676(1408,45111)	508.66(37.62,1252.71)	-0.0037	-0.0167	-0.0172
Tajikistan	29088(22251,36984)	1742.32(1076.37,2574.80)	242583(182181,314729)	14769.27(10653.82,19570.40)	8855(850,21756)	539.29(51.38,1319.56)	48265(37112,61231)	1729.19(1068.48,2555.83)	405429(304774,527505)	14647.63(10560.67,19416.40)	14813(1408,36281)	535.35(51.30,1326.39)	-0.0075	-0.0082	-0.0073
Thailand	414005(315790,526166)	2337.70(1445.66,3424.88)	3788253(2912512,4797357)	20920.81(15518.97,27104.06)	141780(7604,347275)	782.92(38.44,1947.18)	253408(191097,322778)	2205.97(1361.44,3258.81)	2304502(1737441,2926781)	19173.92(13978.03,25244.34)	86308(4733,216157)	717.83(38.03,1804.74)	-0.0564	-0.0835	-0.0831
Timor-Leste	4720(3577,6034)	2053.53(1254.42,2993.67)	39809(29835,50899)	17254.01(12330.78,22871.36)	1478(92,3617)	640.52(39.67,1560.82)	9776(7382,12566)	2068.84(1264.62,3015.40)	82369(61488,105323)	17380.36(12415.88,23040.35)	3093(187,7670)	652.48(38.30,1610.03)	0.0075	0.0073	0.0187
Togo	22782(17431,28729)	1860.89(1152.36,2698.66)	197226(149539,255764)	16824.59(12167.62,22342.56)	7208(580,17593)	615.66(48.80,1507.44)	49215(37507,61730)	1851.14(1147.13,2682.47)	432693(328482,560363)	16713.04(12086.53,22206.56)	15884(1323,39229)	614.05(50.91,1511.93)	-0.0052	-0.0066	-0.0026
Tokelau	9(6,11)	1855.56(1159.03,2736.14)	70(52,90)	15441.04(11163.51,20641.13)	3(0,7)	573.04(37.78,1406.55)	7(5,9)	1850.48(1156.37,2728.11)	57(43,73)	15388.79(11126.49,20571.12)	2(0,5)	571.58(39.65,1392.02)	-0.0027	-0.0034	-0.0025
Tonga	630(477,807)	1858.94(1160.86,2741.43)	5075(3833,6559)	15461.29(11178.58,20668.90)	189(12,469)	575.78(37.76,1394.69)	583(440,747)	1860.83(1161.82,2744.46)	4768(3597,6145)	15491.77(11199.28,20708.35)	177(12,445)	575.06(38.87,1425.88)	0.001	0.002	-0.0013
Trinidad and Tobago	6300(4975,7855)	1818.05(1169.70,2602.16)	63778(48398,81705)	18620.56(13517.97,24628.72)	2351(148,5716)	686.40(44.18,1676.32)	4954(3922,6171)	1814.84(1167.56,2597.75)	50988(38677,65293)	18582.73(13490.76,24580.08)	1876(128,4587)	683.80(43.85,1673.62)	-0.0018	-0.002	-0.0038
Tunisia	50392(39107,62867)	1873.18(1180.39,2718.15)	481263(365204,621984)	18049.11(13124.60,23964.93)	18809(1853,46366)	705.67(71.69,1726.24)	47051(36507,58821)	1869.23(1177.51,2713.25)	452134(343320,583787)	18027.53(13111.34,23939.27)	17546(1733,43044)	699.70(69.91,1707.74)	-0.0021	-0.0012	-0.0085
Turkmenistan	20033(15317,25506)	1738.22(1074.29,2568.74)	167552(125804,217414)	14719.72(10614.45,19510.60)	6095(557,15332)	535.61(49.82,1324.47)	22898(17470,29220)	1721.83(1064.37,2544.78)	195040(146332,253952)	14562.31(10496.14,19306.57)	7129(697,17496)	532.22(50.49,1318.30)	-0.0094	-0.0107	-0.0063
Tuvalu	46(35,59)	1867.61(1165.35,2755.21)	384(289,493)	15568.40(11252.26,20809.42)	14(1,36)	578.39(38.01,1433.58)	64(48,83)	1850.07(1156.19,2727.44)	538(405,693)	15375.24(11115.70,20553.87)	20(1,50)	572.58(39.16,1408.88)	-0.0094	-0.0124	-0.01
Türkiye	338950(263359,428204)	1833.47(1154.58,2663.43)	3195481(2433207,4106021)	17481.27(12865.07,22869.45)	125248(12742,307698)	685.57(71.05,1663.79)	345458(271023,429410)	1821.92(1140.04,2649.08)	3396187(2610367,4303791)	17512.14(12984.88,22832.28)	133408(14045,316137)	687.27(73.38,1629.06)	-0.0063	0.0018	0.0025
Uganda	66068(50033,84874)	1157.61(706.12,1723.26)	532897(401156,683650)	9603.00(6896.51,12717.74)	19695(2526,47860)	355.41(47.56,854.12)	176251(133455,226477)	1150.08(701.68,1712.63)	1420734(1069589,1823607)	9539.21(6847.28,12631.80)	53058(7114,132055)	356.90(48.49,880.33)	-0.0065	-0.0066	0.0042
Ukraine	177778(139671,218444)	1646.24(1090.13,2302.82)	1506117(1179138,1893536)	13782.03(10449.40,17597.21)	57480(8347,135472)	525.61(75.63,1240.72)	108458(85519,133147)	1638.15(1084.76,2291.22)	894840(702391,1122229)	13712.20(10393.82,17510.53)	34100(4723,80477)	523.03(73.67,1248.83)	-0.0049	-0.0051	-0.0049
United Arab Emirates	7586(5914,9477)	1824.85(1155.30,2635.93)	74330(56626,95876)	17603.06(12803.81,23422.29)	2901(298,7167)	686.40(67.01,1699.55)	20975(16304,26077)	1863.93(1172.05,2690.36)	199651(151787,257572)	17966.24(13080.99,23885.96)	7781(752,19120)	700.49(70.90,1725.24)	0.0214	0.0206	0.0205
United Kingdom	284333(224769,352382)	2464.71(1633.58,3448.44)	2504820(1992004,3109312)	20337.23(15524.54,25999.71)	90314(6228,218203)	732.96(48.51,1760.54)	298000(235669,369381)	2484.95(1660.61,3446.67)	2498325(1993308,30	20388.89(15540.26,25939.18)	89780(6003,217874)	732.69(47.92,1763.86)	0.0082	0.0025	-0.0004
United Republic of Tanzania	98196(75469,125829)	1138.59(712.88,1693.98)	789991(606440,1002314)	9476.09(6951.57,12575.99)	29140(4120,71284)	350.13(49.55,838.33)	228393(173046,289005)	1175.25(716.47,1749.35)	1865517(1411312,2434067)	9809.93(7006.54,13107.34)	70012(9631,170715)	368.63(50.43,893.12)	0.0322	0.0352	0.0528
United States of America	1309042(1039394,1593642)	2406.01(1618.39,3322.82)	10902081(8599163,13444799)	19203.04(14581.95,24385.53)	395007(28284,956570)	695.65(49.28,1670.35)	1549943(1224125,1911553)	2417.57(1621.29,3355.95)	12440481(9815642,15502199)	18806.54(14368.45,24094.20)	444936(32546,1054890)	672.62(49.04,1622.15)	0.0048	-0.0206	-0.0331
United States Virgin Islands	522(410,656)	1822.63(1172.09,2609.61)	5233(3971,6724)	18700.16(13574.32,24734.98)	194(12,468)	692.68(42.38,1676.14)	254(200,318)	1819.64(1170.49,2604.83)	2600(1972,3332)	18649.88(13538.64,24668.51)	96(6,235)	688.68(42.25,1681.18)	-0.0016	-0.0027	-0.0058
Uruguay	12534(9385,16416)	1633.85(1014.30,2409.45)	99221(74547,127789)	12961.90(9324.28,17427.99)	3613(365,8977)	471.98(46.33,1168.94)	11572(8665,15212)	1630.33(1012.16,2404.06)	95357(72275,122918)	12937.17(9306.30,17393.86)	3458(342,8841)	468.78(45.57,1169.48)	-0.0022	-0.0019	-0.0068
Uzbekistan	111906(85593,142414)	1741.54(1075.99,2573.50)	935816(702763,1214265)	14755.99(10644.47,19555.14)	34057(3241,84594)	537.16(51.27,1326.92)	138503(106268,176126)	1730.58(1069.28,2557.85)	1176747(884028,1532799)	14661.42(10571.42,19434.09)	42922(3848,106868)	534.82(48.77,1321.33)	-0.0063	-0.0064	-0.0044
Vanuatu	895(678,1141)	1864.27(1163.61,2749.91)	7216(5463,9314)	15533.84(11228.30,20763.51)	267(18,669)	575.34(37.97,1409.88)	1755(1327,2252)	1862.98(1162.94,2747.87)	14473(10920,18644)	15515.55(11215.50,20740.03)	535(36,1343)	574.03(38.70,1417.65)	-0.0007	-0.0012	-0.0023
Venezuela (Bolivarian Republic of)	102851(81544,127229)	1699.07(1104.15,2430.38)	1027885(795084,1309398)	17190.97(12764.79,22336.10)	38185(2686,93505)	638.75(45.06,1558.55)	105015(82411,130758)	1746.06(1111.66,2490.37)	1061473(799540,1376218)	17969.99(13144.85,23836.65)	39391(2719,95937)	666.94(45.26,1640.74)	0.0277	0.0453	0.0441
Viet Nam	450403(341886,575562)	2078.32(1270.35,3029.57)	3740492(2799361,4785714)	17485.11(12488.89,23182.86)	140106(8124,344416)	654.98(38.65,1601.94)	440560(334396,562025)	2063.63(1261.40,3007.79)	3658775(2740668,4680935)	17322.85(12377.44,22965.41)	137629(7889,337663)	651.72(37.79,1602.19)	-0.0071	-0.0093	-0.005
Yemen	83603(64554,103462)	1867.38(1175.82,2711.56)	737360(562797,958063)	18023.48(13110.28,23935.92)	28270(2554,69415)	693.31(68.63,1703.45)	212078(164585,263667)	1873.04(1180.12,2718.14)	1958850(1488546,2540101)	18050.69(13125.73,23966.97)	75239(7113,189853)	694.47(68.07,1709.02)	0.003	0.0015	0.0017
Zambia	34820(26349,44663)	1242.64(748.19,1837.55)	289852(218755,376766)	10631.51(7647.90,14178.21)	10768(1532,26596)	395.65(54.52,959.28)	82608(62743,105735)	1239.90(746.60,1833.24)	691310(522928,894624)	10616.38(7649.09,14161.29)	25893(3569,63017)	398.33(55.73,963.32)	-0.0022	-0.0014	0.0068
Zimbabwe	58860(44685,75402)	1608.36(989.22,2364.27)	483383(362397,627849)	13755.65(9897.58,18241.99)	17769(1695,42042)	506.18(48.26,1216.09)	82965(63358,106476)	1607.40(988.59,2362.85)	692544(519751,899067)	13747.90(9891.94,18231.80)	25569(2384,60802)	507.94(49.54,1226.82)	-0.0006	-0.0006	0.0035
Values in parentheses are 95% uncertainty intervals. Count data are in millions presented to two significant figures.
